# Supplementary material for: Health economic evaluations of preventative care for perinatal anxiety and associated disorders: a rapid review
Source: PubMed Central journal article supplement (PMC10900391; doi:10.1136/bmjopen-2022-068941), 2024-02-27
Supplement: bmjopen-2022-068941.draft_revisions.pdf [file bmjopen-2022-068941.draft_revisions.pdf]

# BMJ Open

BMJ Open is committed to open peer review. As part of this commitment we make the peer review history of every article we publish publicly available.

When an article is published we post the peer reviewers' comments and the authors' responses online. We also post the versions of the paper that were used during peer review. These are the versions that the peer review comments apply to.

The versions of the paper that follow are the versions that were submitted during the peer review process. They are not the versions of record or the final published versions. They should not be cited or distributed as the published version of this manuscript.

BMJ Open is an open access journal and the full, final, typeset and author-corrected version of record of the manuscript is available on our site with no access controls, subscription charges or pay-per-view fees (<http://bmjopen.bmj.com>).

If you have any questions on BMJ Open's open peer review process please email [info.bmjopen@bmj.com](mailto:info.bmjopen@bmj.com)

# BMJ Open

## Cost-effectiveness of preventative care for perinatal anxiety and associated disorders: A rapid review

|                               |                                                                                                                                                                                                                                                                                                                                                                                         |
|-------------------------------|-----------------------------------------------------------------------------------------------------------------------------------------------------------------------------------------------------------------------------------------------------------------------------------------------------------------------------------------------------------------------------------------|
| Journal:                      | <i>BMJ Open</i>                                                                                                                                                                                                                                                                                                                                                                         |
| Manuscript ID                 | bmjopen-2022-068941                                                                                                                                                                                                                                                                                                                                                                     |
| Article Type:                 | Original research                                                                                                                                                                                                                                                                                                                                                                       |
| Date Submitted by the Author: | 11-Oct-2022                                                                                                                                                                                                                                                                                                                                                                             |
| Complete List of Authors:     | Pisavadia, Kalpa; Bangor University, School of Medical and Health Sciences<br>Spencer, Llinos; Bangor University, Centre for Health Economics and Medicine Evaluation<br>Tuersley, Lorna; Bangor University,<br>Ayers, Susan; City University,<br>Coates, Rose ; City University of London,<br>Edwards, Rhiannon; Bangor University, Centre for Health Economics & Medicines Evaluation |
| Keywords:                     | HEALTH ECONOMICS, PREVENTIVE MEDICINE, MENTAL HEALTH                                                                                                                                                                                                                                                                                                                                    |
|                               |                                                                                                                                                                                                                                                                                                                                                                                         |

SCHOLARONE™  
Manuscripts

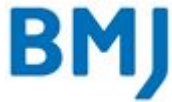

I, the Submitting Author has the right to grant and does grant on behalf of all authors of the Work (as defined in the below author licence), an exclusive licence and/or a non-exclusive licence for contributions from authors who are: i) UK Crown employees; ii) where BMJ has agreed a CC-BY licence shall apply, and/or iii) in accordance with the terms applicable for US Federal Government officers or employees acting as part of their official duties; on a worldwide, perpetual, irrevocable, royalty-free basis to BMJ Publishing Group Ltd ("BMJ") its licensees and where the relevant Journal is co-owned by BMJ to the co-owners of the Journal, to publish the Work in this journal and any other BMJ products and to exploit all rights, as set out in our [licence](#).

The Submitting Author accepts and understands that any supply made under these terms is made by BMJ to the Submitting Author unless you are acting as an employee on behalf of your employer or a postgraduate student of an affiliated institution which is paying any applicable article publishing charge ("APC") for Open Access articles. Where the Submitting Author wishes to make the Work available on an Open Access basis (and intends to pay the relevant APC), the terms of reuse of such Open Access shall be governed by a Creative Commons licence – details of these licences and which [Creative Commons](#) licence will apply to this Work are set out in our licence referred to above.

Other than as permitted in any relevant BMJ Author's Self Archiving Policies, I confirm this Work has not been accepted for publication elsewhere, is not being considered for publication elsewhere and does not duplicate material already published. I confirm all authors consent to publication of this Work and authorise the granting of this licence.

## Cost-effectiveness of preventative care for perinatal anxiety and associated disorders: A rapid review

Miss Kalpa Pisavadia [Kalpa.pisavadia@bangor.ac.uk](mailto:Kalpa.pisavadia@bangor.ac.uk)

Dr Llinos Haf Spencer [L.spencer@bangor.ac.uk](mailto:L.spencer@bangor.ac.uk)

Dr Lorna Tuersley [Lorna.tuersley@gmail.com](mailto:Lorna.tuersley@gmail.com)

Dr Rose Coates [Rose.coates@city.ac.uk](mailto:Rose.coates@city.ac.uk)

Professor Susan Ayers [Susan.ayers.1@city.ac.uk](mailto:Susan.ayers.1@city.ac.uk)

Professor Rhiannon Tudor Edwards [R.t.edwards@bangor.ac.uk](mailto:R.t.edwards@bangor.ac.uk)

**Corresponding author:** Kalpa Pisavadia Research Project Support Officer, Centre for Health Economics and Medicines Evaluation (CHEME), Ardudwy Hall, Normal Site, Bangor University, Bangor, Gwynedd, Wales, UK, LL57 2PZ. Email: [Kalpa.pisavadia@bangor.ac.uk](mailto:Kalpa.pisavadia@bangor.ac.uk)

## Abstract

**Aim:** Perinatal mental health (PMH) problems affect one in five women and cost the United Kingdom (UK) £8.1 billion for every year of births, with 72% of this cost due to the long-term impact on the child. The aim of this rapid review was to evaluate the cost impact of services supporting perinatal mental health on the National Health Service (NHS) and similar systems.

**Methodology:** This study adopted a rapid review approach, using sections of the standard systematic review process to generate quality evidence. This methodology features a systematic database search, PRISMA diagram, screening of evidence, data extraction, critical appraisal, and narrative synthesis.

**Results:** Databases yielded 3,212 results published between January 2000 and July 2022. Titles and abstracts were screened, and an additional four papers were retrieved from existing systematic reviews. Of these twenty-one included papers there were economic evaluations (n=8), modelling studies (n=6), SR's (n=4), randomised controlled trials (RCT) (n=2), a cohort study (n=1).

**Discussion:** The results indicate a lack of economic evaluation specifically for perinatal anxiety, with most study articles focusing on postnatal depression (PND). Interventions to prevent postnatal mental health problems were found to be cost-effective. Modelling studies have also been conducted, which suggest that treating PND with counselling would be cost-effective.

**Conclusion:** The costs of not intervening in maternal mental health outweigh the costs of preventative interventions. Preventative measures such as screening and counselling for maternal mental health are shown to be cost-effective interventions to improve outcomes for women and children.

**Key words:** preventative, life-course, perinatal anxiety, postnatal depression, cost of illness, cost-effectiveness, economic modelling.

## Article summary

### Strengths and limitations of this study

- This review found no RCTs including economic evaluation of perinatal anxiety, which indicates an evidence gap.
- The strength of this rapid review is that it has highlighted costs associated with perinatal mental health interventions in a rigorous, novel way which will benefit the NIHR funded (Award number: NIHR133727), Map Alliance Project team with the economic evaluation for that study (currently in progress).
- Although there are several economic evaluations on perinatal mental health care from the USA, evidence from the UK is limited.
- There is an absence of health economic studies describing the range of public sector costs and costs to individuals from Scotland and Wales in relation to perinatal anxiety.
- Although health economic studies are showing the benefits of investing in PND, there are no published UK-based RCTs investigating perinatal mental

health interventions, which include information on costs (RCT's is the most scientifically rigorous method of hypothesis testing available and is regarded as the gold standard trial for evaluating the effectiveness of interventions [1]).

## Introduction

The perinatal period refers to pregnancy and the first 12 months after childbirth [2]. One in five women experiences mental health problems during this time and the cost is estimated to be £8.1 billion for every year of births in the United Kingdom (UK) [3]. Maternal mental health problems include postnatal depression (PND) (also known as Postpartum Depression (PPD) internationally), characterised by depressed mood and anxiety, feelings of inadequacy, and impaired infant bonding [4]. More severe maternal mental health issues such as postpartum psychosis, can present with feelings of agitation, confusion or even hallucinations and delusions [5]. Crucially, suicide is the leading cause of maternal death in the perinatal period [6]. It is, thus, imperative that proactive planning and cost-effective preventative solutions are a public policy priority.

The Maternal Mental Health Alliance (2020) warns that the COVID-19 pandemic may lead to a potential increase in perinatal mental health (PMH) difficulties. A recent scoping review on the impact of the COVID-19 pandemic on maternal and perinatal health found that during pregnancy, self-reported rates of clinically relevant anxiety and depressive symptoms were higher among pregnant women compared to pre-pandemic levels [7]. Women who experience non-health-related stressors such as marital, housing, and financial difficulties or live in economically deprived areas, were already at higher risk of PMH issues prior to the pandemic [8]. The pandemic has further exacerbated the risk of impaired mental health due to limited antenatal care, reduced family support, social distancing and quarantine rules. These factors, in combination with anxieties surrounding the transmission of the COVID-19 disease, have been found to significantly impact maternal mental health [7].

Untreated maternal mental illness not only impacts mothers, but also adversely impacts their children, significantly contributing to wider societal and National Health Service (NHS) costs. Of the total costs of perinatal mental health difficulties in the UK, 72% is due to the long-term impact on the child [3]. An economic evaluation of a South London cohort found that for each child exposed to maternal perinatal depression, public sector costs exceeded £3,030. Costs due to reduced earnings were £1,400 per child, and health-related quality of life loss was valued at £3,760 per child [9].

Public sector costs are likely to be significantly reduced by utilising a prevention strategy to reduce the incidence of poor maternal mental health [9]. Decreased maternal and infant bonding, reduced breastfeeding initiation rates and duration, low birth weight, and poorer child growth have been associated with PND [10]. The regression analyses from an Australian cohort study revealed that children of mothers experiencing sub-clinical and increasing and persistently high depressive symptoms were twice as likely to have emotional and behavioural difficulties than

1  
2  
3 children of mothers reporting minimal symptoms [11]. Delayed or impaired cognitive,  
4 linguistic, physical, and psychological health development have been reported in  
5 infants and children with mothers with PND (Moore Simas et al., 2020). There is also  
6 a risk of intergenerational transmission of socio-economic disadvantage in which  
7 maternal mental illness impacts the child's quality of life by having a long-term  
8 adverse effect on education and employment prospects [9,12].  
9  
10

11 Despite the long-term risks of untreated maternal mental health issues, as of 2014 in  
12 the UK, only 30-50% of women with PMH problems were identified, and only 7%  
13 were referred to specialist care [3]. Most women with PMH problems did not access  
14 care [3]. This may have been particularly the case for women with mild to moderate  
15 PMH problems or less commonly recognised problems, such as anxiety, obsessive-  
16 compulsive disorder (OCD), or post-traumatic stress disorder (PTSD) [3].  
17 Furthermore, access to care may also be limited by maternal time constraints and  
18 fears of being judged (Posmontier et al., 2016). Web-based approaches for  
19 delivering interventions could be a promisingly cost-effective solution in supporting  
20 mothers in the perinatal period by widening access to care, which hospitals could  
21 adopt as postnatal care support. A recent cost-effectiveness study, within a  
22 randomised controlled trial (RCT), evaluated a web-based approach for delivering a  
23 psychoeducational intervention [14]. This web-based approach was not only cost-  
24 effective in supporting first-time mothers, but also had the best improvements in self-  
25 efficacy, social support, and psychological well-being of women in Singapore.  
26  
27  
28  
29

30 The National Institute for Health and Care Excellence (National Institute for Health  
31 and Care Excellence, 2022) recommend postnatal care for up to eight weeks after  
32 birth. Since 2015, it has been recommended that UK midwives carry out emotional  
33 well-being checks at antenatal check-ups and at each postnatal contact up to eight  
34 weeks after birth. Women should be asked about their emotional wellbeing, what  
35 family and social support they have and their usual coping strategies for dealing with  
36 day-to-day matters. In 2018, the National Collaborating Centre for Mental Health  
37 worked with NICE to develop the Perinatal Mental Health Care Pathway [15]. The  
38 guidance in that report follows a process agreed upon by NICE and sets out  
39 pathways to deliver a strategic transformation of perinatal mental health care.  
40 Psychological interventions, either alone or in conjunction with pharmacological  
41 treatment, are recommended for complex or severe mental health problems  
42 following referral to a specialist community perinatal mental health team [2].  
43  
44  
45  
46

47 Since 2015 there have been improvements to funding plans and commitments in the  
48 provision of more specialist Community Perinatal Mental Health Services across the  
49 UK. For example, in 2019, the Scottish Government revealed that £52 million would  
50 be spent on improving access to perinatal and infant mental health services, and  
51 from 2018 to 2020, the Welsh Government increased recurrent annual funding from  
52 £1.5 million to £2.5 million for specialist PMH services [16]. In England, the  
53 Government committed £365 million to provide specialist perinatal community  
54 services across the country as announced by NHS England in April 2019 (National  
55 Institute of Health and Care Excellence, 2022). However, it is questionable whether  
56 there is sufficient funding for long-term plans and where the investment for the  
57 workforce across the UK will come from [16].  
58  
59  
60

## Aim

The aim of this rapid review was to evaluate evidence relating to the cost impact of health services within the NHS and similar healthcare systems for perinatal anxiety and associated disorders. The full protocol for this rapid review is available from PROSPERO [18].

## Methods

This study adopted a rapid review approach, utilising sections of the standard systematic review process to generate quality evidence in a shorter timeframe. This methodology follows the minimum requirements for rapid reviews, featuring a systematic database search, PRISMA diagram [19] screening of evidence, data extraction, critical appraisal and narrative synthesis. This revised methodology is used by the Wales COVID-19 Evidence Centre [20–22].

## Patient and Public Involvement

No patient involvement

## Search Strategy

The key evidence sources of this rapid review included PubMed, Cumulative Index to Nursing and Allied Health Literature (CINAHL), Cochrane Library, Applied Social Sciences Index and Abstracts (ASSIA), PsycINFO and MEDLINE. The search terms consisted of words related to perinatal anxiety and/or depression, health and psychiatric services and economic evaluation terms. The searches were conducted on 23<sup>rd</sup> April 2022. Mendeley reference management software was used to manage study articles found and remove duplicates. See supplementary material for the full search strategy.

The eligibility criteria for the review are presented in Table 1 and are based on the Population, Intervention, Comparison and Outcome (PICO) framework [23]. This consisted of peer-reviewed economic evaluations of perinatal anxiety and associated disorders such as PND and PTSD from Organisation for Economic Co-operation and Development (OECD) countries in English published after January 2000.



Table 1: Participants, Intervention/exposure, Comparator and Outcomes (PICO) framework

| Question                                                                                    |                                                                                                              |
|---------------------------------------------------------------------------------------------|--------------------------------------------------------------------------------------------------------------|
| What is the cost of care for women experiencing perinatal anxiety and associated disorders? |                                                                                                              |
| Participants                                                                                | Pregnant women or perinatal women                                                                            |
| Intervention / exposure                                                                     | Perinatal anxiety and associated disorders                                                                   |
| Comparator                                                                                  | No comparator                                                                                                |
| Outcomes                                                                                    | Costs of primary care and support services for women experiencing perinatal anxiety and associated disorders |
| Study Considerations                                                                        |                                                                                                              |
| Primary, secondary, grey literature, preprints                                              |                                                                                                              |
| Databases                                                                                   |                                                                                                              |
| PubMed, CINAHL, Cochrane Library, ASSIA, PsycINFO, MEDLINE                                  |                                                                                                              |

### Selection of studies

One reviewer (KP) independently selected potentially eligible studies based on a screening of titles and abstracts. Two reviewers (LHS and KP) selected additional studies from existing systematic reviews. The full texts of selected studies were assessed for eligibility by three reviewers (KP and LHS, with mediation by LT) in the data extraction process.

### Data extraction

Data extraction and study quality assessment were performed by three reviewers (KP, LHS, LT). Data was collected on country, study design, intervention type, data collection methods and dates, sample size, and type of participants (See supplementary material 1 for results tables).

### Quality assessment

The quality assessment was undertaken by two reviewers (LHS and KP) and four papers were checked by a third reviewer for quality assurance purposes (LT). The Drummond checklist [24] was used for the quality appraisal of health economic papers and the Checklist for critical appraisal and data extraction for systematic reviews of prediction modelling studies (CHARMS) checklist was used for the

1  
2  
3 modelling studies [25]. The Joanna Briggs Institute (JBI) critical appraisal tools were  
4 used for the quality appraisal of systematic reviews, randomised clinical trials, cohort  
5 studies and cross-sectional studies [26–28] (see supplementary materials 2).  
6  
7  
8

9 **[Insert figure 1 here]**  
10  
11  
12  
13  
14  
15  
16  
17  
18  
19  
20  
21  
22  
23  
24  
25  
26  
27  
28  
29  
30  
31  
32  
33  
34  
35  
36  
37  
38  
39  
40  
41  
42  
43  
44  
45  
46  
47  
48  
49  
50  
51  
52  
53  
54  
55  
56  
57  
58  
59  
60

For peer review only

## Results

Searches of databases yielded 3212 results, of which 1226 duplicates were removed. The remaining 1986 results were screened against titles and abstracts, and an additional four papers were retrieved from existing systematic reviews. A total of 28 papers met the criteria for full-text screening. Seven papers were excluded due to not being able to access the full text (n=4), ineligible study design (n=1), or lack of relevancy (non-OECD country) (n=2). Twenty-one study articles were included in the final rapid review (see Figure 1 and Table 2). Seventeen of these were identified from database searchers, and four were identified from included Systematic Reviews (SR's).

Of these twenty-one included papers there were economic evaluations (n=8), modelling studies (n=6), SR's (n=4), randomised controlled trials (RCT) (n=2), a cohort study (n=1). All included study articles were peer-reviewed. The included study articles were separated into five sub-categories: children, prevention, cost of maternal health, cost of single interventions, and comparison cost of interventions. The following discussion provides a more detailed overview of the findings (see Table 2).

**Table 2: Map of maternal cost of illness studies by evidence type (including studies on depression, anxiety and maternal health and wellbeing)**

| Type of Evidence                  | Cost of Illness studies   |                         |                         |                              |                                  | Number of studies |
|-----------------------------------|---------------------------|-------------------------|-------------------------|------------------------------|----------------------------------|-------------------|
|                                   | Children                  | Prevention              | Cost of maternal health | Cost of single interventions | Comparison cost of interventions |                   |
| Randomised Controlled Trial (RCT) |                           |                         |                         | Morrell et al. (2000)        | Grote et al. (2017)              | 2                 |
| Systematic Review (SR)            |                           | Moran et al. (2020)     |                         | Morrell et al. (2016)        | Camacho and Shields (2018)       |                   |
|                                   |                           |                         |                         |                              | Gurung et al., (2018)            | 4                 |
| Cohort study                      | Moore Simas et al. (2020) |                         |                         |                              |                                  | 1                 |
| Economic evaluation               |                           | Petrou et al. (2006)    | Petrou et al. (2002)    |                              | Henderson et al. (2019)          |                   |
|                                   |                           | Ride et al. (2016)      | Dagher et al. (2012)    |                              |                                  |                   |
|                                   |                           | Ride (2018)             | Ammerman et al. (2016)  |                              |                                  |                   |
|                                   |                           |                         | Roberts et al. (2001)   |                              |                                  | 8                 |
| Economic modelling studies        | Bauer et al. (2015)       | Counts et al. (2022)    | Franta et al. (2022)    | Stevenson et al. (2010)      |                                  |                   |
|                                   |                           | Wilkinson et al. (2017) | Chojenta et al. (2019)  |                              |                                  | 6                 |
| <b>Total number of studies</b>    | <b>2</b>                  | <b>6</b>                | <b>6</b>                | <b>3</b>                     | <b>4</b>                         | <b>21</b>         |

1  
2  
3 The included papers are organised under three different themes. The first theme is  
4 studies including perinatal anxiety, the second theme is perinatal depression, and  
5 the third theme is perinatal health and wellbeing. These included studies are detailed  
6 below.  
7  
8  
9

### 10 Studies including perinatal anxiety

11 This review found only two studies focussing on perinatal anxiety [31,32]. Camacho  
12 and Shields conducted a systematic review of eight studies focussing on maternal  
13 mental health in the UK. This review searched for economic evaluations of  
14 interventions for the prevention or treatment of perinatal anxiety and depression  
15 (PAD), intending to guide researchers and commissioners of perinatal mental health  
16 services toward potentially cost-effective strategies. Camacho and Shields (2018)  
17 found that two interventions were likely to be cost-effective, in which both  
18 incorporated identification plus treatment of PND. These treatments included health  
19 visitor screening with counselling, GP and psychiatrist collaborative screening and  
20 treatment. This systematic review also found that psychiatric day hospital treatment,  
21 health visitor counsellors, and telephone-delivered peer support are possibly cost-  
22 effective.  
23  
24  
25  
26

27 The second study found on perinatal anxiety was an economic evaluation that  
28 consisted of a cost-effectiveness and cost-utility analysis of the What Were We  
29 Thinking (WWWT) intervention which was conducted alongside a cluster-randomised  
30 controlled trial by Ride et al. (2016). WWWT is a psychoeducational intervention  
31 targeted at the partner relationship, management of infant behaviour and parental  
32 fatigue for the prevention of postnatal maternal mental health problems. Although  
33 WWWT shows promise as a preventive intervention there is uncertainty over its cost-  
34 effectiveness as the analysis showed no statistically significant difference between  
35 the intervention and control groups in costs or outcomes. The intervention was  
36 estimated to cost £74.48<sup>1</sup> per participant.  
37  
38  
39

### 40 Studies including perinatal depression

41 This review found fifteen studies focussing on perinatal depression [4,5,9,10,29,33–  
42 37,39–42,46]. A cross-sectional study from the USA conducted between 2006 and  
43 2011 investigated the out-of-pocket expenses and insurer expenses of depressed  
44 mothers compared to non-depressed mothers [33]. Depressed mothers were more  
45 likely to incur insurer and out-of-pocket expenses (£1,285 vs £853<sup>□</sup>) and have  
46 higher insurer expenses (£10,485 vs £7,508<sup>□</sup>). A study by Bauer et al. (2015) used  
47 the perspective of the public sector, individuals, and society to examine some of the  
48 outcomes and long-term economic implications experienced by offspring who have  
49 been exposed to perinatal depression in a South London cohort. Bauer et al. (2015)  
50 found that for each child exposed to perinatal depression, public sector costs  
51 exceeded £3,380<sup>□</sup>, costs due to reduced earnings were £1,562<sup>□</sup>, and health-related  
52 quality of life loss was valued at £3760<sup>□</sup>.<sup>2</sup>  
53  
54  
55  
56  
57

---

58 1 <sup>□□</sup> Prices have been inflated and converted to GBP [53]

59 2 <sup>□</sup> Prices have been inflated to 2021 prices [54].  
60

1  
2  
3 A decision analytic model used a simulated cohort of 1,000 Medicaid-enrolled  
4 pregnant individuals to evaluate the health care costs for individuals receiving PND  
5 preventive intervention or not, for 1 to 5 years post-partum (Counts et al., 2022). This  
6 study found that providing preventive interventions for PPS resulted in an estimated  
7 5-year saving of £602<sup>□□</sup>.<sup>3</sup>  
8  
9

10  
11 Dagher et al., (2012) conducted a cross-sectional study in the USA which  
12 investigated expenditure on health care services from hospital discharge until 11  
13 weeks postpartum. There was a significant difference in healthcare expenditure  
14 between depressed and non-depressed women. The Edinburgh Postnatal  
15 Depression Scale (EPDS) was used to measure depression [47]. The total cost of all  
16 mental health counselling visits for the depressed group (n=31) was £165<sup>□□</sup> and the  
17 cost for the non-depressed group (n= 607) was £15.50<sup>□□</sup> (in 2007). This was a  
18 statistically significant difference ( $p < 0.001$ ).  
19  
20

21 Using a theoretical cohort of 180,000 individuals, Franta et al. (2022) developed a  
22 decision-analytic model using TreeAge Pro software to compare outcomes in  
23 pregnant adolescents who received versus did not receive counselling interventions.  
24 This study found that it is cost-effective to refer all pregnant adolescents for  
25 preventive counselling interventions. Within the theoretical cohort for counselling,  
26 there were 8,935 fewer cases of perinatal depression, 1,606 fewer cases of chronic  
27 depression, 166 fewer preterm deliveries, four fewer neonatal deaths, 20 fewer  
28 cases of sudden infant death syndrome (SIDS), and one fewer case of cerebral  
29 palsy. In total, there were 21,976 additional QALYs and cost savings of  
30 £183,463,169<sup>^</sup>, making it the dominant strategy that had better outcomes with lower  
31 costs.<sup>4</sup>  
32  
33  
34

35 An RCT trial by Grote et al. (2017) compared a multicomponent collaborative care  
36 intervention for depression (MOMcare - a choice of brief interpersonal psychotherapy  
37 or pharmacotherapy or both) with enhanced maternity support services (MSS-Plus)  
38 in the public health system of Seattle, USA. The incremental benefit and cost and the  
39 net benefit for women with major depression and PTSD was estimated. When  
40 controlled for baseline depression severity, women with probable depression and  
41 PTSD in MOMCare had 68 more depression-free days over 18 months than those in  
42 MSS-Plus ( $p < .05$ ). There was an additional £1,943<sup>□□</sup> depression care cost per  
43 MOMCare participant with comorbid PTSD. The incremental net benefit of MOMCare  
44 was positive if depression free days was valued below £18<sup>□□</sup>. For women with  
45 probable major depression and PTSD, MOMCare had a significant clinical benefit  
46 over MSS-Plus, with only a moderate increase in health services cost.<sup>5</sup>  
47  
48  
49

50 A systematic review of papers published between 2000 and 2015 found that a  
51 combination of PND screening and treatment was cost-effective and that treatments  
52 such as psychological therapy, facilitated self-help, and customised treatment was  
53 more cost-effective than standard care. This review also found positive results for  
54 preventive strategies which involved peer support or counselling and other specific  
55  
56

57 <sup>3</sup> □□ Prices have been inflated and converted to GBP [52].

58 <sup>4</sup> ^ Prices have been converted to GBP [55]

59 <sup>5</sup> □□ Prices have been inflated and converted to GBP [52].  
60

1  
2  
3 support. However, group cognitive behavioural therapy (CBT) was not found to be  
4 cost-effective compared to standard care in one study [37].  
5

6  
7 Henderson et al. (2019) conducted a cluster RCT of health visitors trained to assess  
8 PND and deliver psychological approaches to women at risk of depression plus  
9 either a cognitive behavioural approach or a person-centred approach weekly for  
10 eight weeks. A cost-effectiveness analysis was run parallel to this for all mothers at  
11 low risk of depression in accordance with the EPDS at six months postnatal. This  
12 study found that CBT had a marginally higher probability of being cost-effective than  
13 a person-centred approach.  
14

15  
16 A cohort study with a sample size of 135,678 mother-child pairs with and without  
17 PND exposure revealed similar findings (Moore Simas et al., 2020). The results of  
18 this analysis suggest that the health resource utilisation and costs over the first 24  
19 months of life in children of mothers with PND exceeded that of children of mothers  
20 without evidence of PND £22,940<sup>□□</sup> and £20,487<sup>□□</sup>, respectively. This was a  
21 significant difference of £2,453.<sup>6</sup>  
22

23  
24 A systematic review and meta-analysis conducted by the National Institute for Health  
25 and Care Research (NIHR) aimed to evaluate the clinical effectiveness, cost-  
26 effectiveness, acceptability, and safety of antenatal and postnatal interventions for  
27 pregnant and postnatal women to prevent PND postnatal depression [39]. This  
28 review found that the most beneficial and cost-effective interventions appeared to be  
29 midwifery redesigned postnatal care, person-centred approach (PCA) and  
30 interpersonal psychotherapy (IPT). Women valued seeing the same health worker,  
31 partners' involvement, and access to several visits from a midwife or health visitor  
32 trained in person-centred or cognitive-behavioural approaches [39].  
33  
34  
35

36  
37 A longitudinal study by Petrou et al. (2002) estimated the economic costs of PND in  
38 a geographically defined cohort of women at high risk of developing the condition  
39 with the use of an RCT to identify women considered to be of high risk. Unit costs  
40 were applied to estimates of health and social care resource use made by 206  
41 women and their infants recruited from antenatal clinics, and net costs per mother-  
42 infant dyad over the first 18 months post-partum were estimated. This study found  
43 that costs were £587<sup>□</sup> higher for women with PND than for women without PND.  
44 Economic costs were also higher for women with extended experiences of the  
45 condition.<sup>7</sup>  
46  
47

48  
49 A cost-effectiveness analysis of preventive interventions, which consisted of  
50 counselling and support for the mother–infant relationship, targeted at women at high  
51 risk of developing PND, was conducted by Petrou, et al. (2006). This study found  
52 that given the negative impact of PND on later child development, preventive  
53 interventions are likely to be cost-effective even at relatively low willingness to pay  
54 thresholds for preventing one month of PND during the first 18 months post-partum.  
55 The mean health and social care costs were estimated at £3,345<sup>□</sup> per mother–infant  
56  
57

58  
59 <sup>6 □□</sup> Prices have been inflated and converted to GDP [52].  
60

<sup>7 □</sup> Prices have been inflated to 2021 prices [54].

1  
2  
3 dyad in the preventive intervention group and £3,277<sup>□</sup> per mother–infant dyad in the  
4 routine primary care group, providing a mean cost difference of £166<sup>□</sup>.<sup>8</sup>  
5  
6

7 A cross-sectional study of 1,250 mothers of infants in a Canadian setting used the  
8 EPDS to investigate the costs associated with perinatal depression [41]. It was found  
9 that costs were notably different for mothers with and without depression. The total  
10 cost for health and social care was £833<sup>□□</sup> for mothers with depression and their  
11 infants, compared to £406<sup>□□</sup> for those with lower depression scores. This was  
12 statistically a significant difference at  $p < .01$ .<sup>9</sup>  
13  
14

15  
16 An economic evaluation conducted by Stevenson et al. (2010) compared the cost-  
17 effectiveness of group Cognitive Behavioural Therapy (gCBT) compared with routine  
18 primary care for women with PND in the UK. This economic evaluation found that  
19 gCBT does not appear to be cost-effective due to the lack of literature providing  
20 robust information. Only one study, an RCT, was deemed applicable to the decision  
21 problem.  
22  
23

24 A cost-effectiveness analysis found that screening for and treating post-partum  
25 depression is a cost-effective intervention and should be considered as a part of  
26 usual postnatal care [5]. This study followed a hypothetical cohort of 1,000 pregnant  
27 women experiencing one live birth over a 2-year time horizon. The analysis found  
28 that screening for and treating PND and psychosis produced 29 more healthy  
29 women at the cost of £938<sup>□□</sup> per woman. The incremental cost-effectiveness ratios  
30 (ICERs) of the intervention branch compared to usual care were £13,702<sup>□□</sup> per  
31 quality-adjusted life year (QALY) gained (below the commonly accepted willingness  
32 to pay threshold of \$50,000/QALY gained) and \$10,182 per remission achieved.  
33  
34

### 35 36 Studies including maternal health and wellbeing

37 This review found four studies relating to health and wellbeing of perinatal women  
38 [30,43,44,48].  
39

40 A systematic review by Moran et al. (2020) estimated the economic burden of a  
41 range of common health problems associated with pregnancy and childbirth. This  
42 review found eight studies that reported incremental costs associated with antenatal  
43 or postnatal mental health problems. Among the four studies that examined costs  
44 during pregnancy, birth, or the immediate post-partum period, the estimated  
45 incremental costs of poor maternal mental health ranged from £422 to £742<sup>□□</sup>.  
46  
47  
48

49 A RCT by Morrell et al. (2000) aimed to establish the relative cost-effectiveness of  
50 postnatal support in the community in addition to the usual care provided by the  
51 community midwives. Three hundred and eleven women were allocated to the  
52 intervention of up to 10 home visits by a community postnatal support worker within  
53 the first postnatal month for a duration of up to three hours. This study found that  
54 there were no savings to the NHS over six months after the introduction of a  
55  
56  
57

58 <sup>8</sup> □ Prices have been inflated to 2021 prices [52].

59 <sup>9</sup> □□ Prices have been inflated and converted to GBP [56].  
60

1  
2  
3 community support worker service and no improvement to the health status among  
4 the women in the intervention group, which was measured by an SF-36  
5 questionnaire [49]. At six weeks, the mean total NHS costs were £975<sup>□</sup> for the  
6 intervention group and £700<sup>□</sup> for the control group. At six months, the figures were  
7 £1,250<sup>□</sup> and £980<sup>□</sup>, respectively.<sup>10</sup>  
8  
9

10 Authors have suggested that prenatal interventions that do not seem cost-effective in  
11 the short term may be cost-effective over a longer time horizon [45]. Ride (2018)  
12 noted that it is important to consider caregiving and family health effects in the  
13 outcomes of maternal health studies. By not including broader sets of costs and  
14 outcomes, resources in postnatal mental health may be misallocated. As a result,  
15 some women may not benefit as much from interventions that might be cost-effective  
16 given a broader time horizon.  
17  
18

19 A modelling study from Australia, published in 2019, utilised cohort data from 1921 to  
20 1995 and found that the healthcare costs for postnatal women who had poor mental  
21 health prior to birth was £1,066<sup>^</sup> [30]. This is on average 11% more than for mothers  
22 with no previous history of poor mental health.<sup>11</sup>  
23  
24  
25

## 26 Discussion

27 This aim of this rapid review was to identify the costs of support, care and treatments  
28 for perinatal anxiety and associated disorders in the UK NHS and similar healthcare  
29 systems. Twenty-one papers were included in this review from Australia, Canada,  
30 Ireland, the USA and the UK, each examining maternal mental health.  
31  
32

33 The results indicate a lack of economic evaluation specifically for perinatal anxiety,  
34 with most study articles focusing on PND [42]. Only two included papers focussed on  
35 anxiety with one being a systematic review looking at anxiety alongside depression  
36 [31]. The other was an economic evaluation of a maternal mental health intervention.  
37 Treatments for maternal mental health in the WWWT intervention consisted of health  
38 visitors with psychiatric training and group sessions focusing on parenting  
39 confidence and emotional well-being with online and face-to-face components (Ride  
40 et al., 2016). The WWWT intervention shows promise as a preventive intervention.  
41 However, there is uncertainty as to its cost-effectiveness. The analysis showed no  
42 statistically significant difference between the intervention and control groups in  
43 costs or outcomes with the intervention estimated to cost £74.48<sup>12</sup> per participant.  
44  
45  
46  
47

48 The majority of the studies included (n=15) focussed on the cost of services and  
49 interventions for PND. The evidence suggests significant health resource costs  
50 outside of mental health services as well as social care costs for PND for mother and  
51 mother-infant dyad. Costs were significantly higher for children of mothers with PND  
52 than for children of mothers without PND. This was a statistically significant  
53 difference of £2,453 (p <.001) [10].  
54  
55  
56

57 <sup>10</sup> □ Prices have been inflated to 2021 prices [54].

58 <sup>11</sup> ^ Prices have been converted to GBP [55]

59 <sup>12</sup> □□ Prices have been inflated and converted to GBP [53]  
60



1  
2  
3 Significantly, counselling was found to be a cost-effective, preventative intervention  
4 for high-risk groups such as pregnant adolescents [36]. Using a hypothetical cohort,  
5 Franta et al. (2022) found that counselling was a cost-effective preventative  
6 measure, leading to fewer cases of perinatal and chronic depression. Counts et al.  
7 (2022) estimated that group counselling (costing £114 per mother) cost around £73<sup>□</sup>  
8 less than individual counselling (£187 per mother) for mothers with PND. Counts et  
9 al. (2022) found that screening for PND costs less than £2 per mother. Studies that  
10 combined screening for PND with an intervention were also found to be cost-  
11 effective resulting in 29 more healthy women at a cost of £938<sup>□□</sup> per woman  
12 (Wilkinson et al., 2017). The incremental cost-effectiveness ratios of the intervention  
13 branch compared to usual care were \$13,857 per QALY gained (below the  
14 commonly accepted willingness to pay threshold of \$50,000/QALY gained) and  
15 \$10,182 per remission achieved.  
16  
17  
18  
19

20 Within this rapid review, the EPDS, a validated measure for postnatal depression  
21 and anxiety [47], was the most frequently used instrument to detect perinatal and  
22 PND in the included studies, followed by the SF-36 scale (Ware, 2000), postal  
23 questionnaires such as the Ontario health survey, Health and Social Service  
24 Utilisation Questionnaire (HSUQ), blinded telephone assessments and medical  
25 records, Medicaid data, resource use logs completed by health visitors based on GP  
26 records, and prospective diaries and face-to-face interviews.  
27  
28

29 In summary, screening was found to be a relatively low-cost method of identifying  
30 women in need of mental health support during the perinatal period. Interventions to  
31 prevent postnatal mental health problems were found to be cost-effective (Ride et  
32 al., 2016). Also, two modelling studies found that treating PND with counselling  
33 would be cost-effective (Stevenson et al., 2010; Wilkinson et al., 2017).  
34  
35

36 Future research in this area should investigate how best to screen all mothers to  
37 prevent and treat further adverse outcomes such as anxiety, OCD, or PTSD [3].  
38 Various psycho-social methods could be used to screen and provide treatment over  
39 the telephone, online or face-to-face. Interventions could be provided by a range of  
40 healthcare professionals such as midwives, health visitors, counsellors,  
41 psychologists, and psychiatrists. The effectiveness and cost-effectiveness of each  
42 intervention, including screening, should be evaluated.  
43  
44

45 Web-based approaches are already promising to be cost-effective solutions to  
46 support mothers in the perinatal period. Most women of childbearing age, including  
47 women who reside in rural areas, now have access to the internet in the UK and  
48 similar health care systems. There is concern regarding web-based interventions, for  
49 example, the lack of engagement could lead to significant drop out [50]. Being able  
50 to access support and treatment using online resources has widened access to care  
51 to postnatal care support. A recent cost-effectiveness study alongside an RCT in  
52 Singapore, evaluated a web-based approach for delivering a psychoeducational  
53 intervention (Zheng et al., 2022). This web-based approach was cost-effective in  
54 supporting first-time mothers and provided the best improvements in self-efficacy,  
55 social support, and psychological well-being of mothers in the perinatal period.  
56  
57  
58  
59  
60

1  
2  
3 The MAP ALLIANCE, funded by the NIHR (Award ID: NIHR133727), project in the  
4 UK aims to examine the care offered and accessed by women experiencing perinatal  
5 anxiety and associated disorders. This study includes an economic component to  
6 evaluate the cost-of-service use for perinatal anxiety and associated disorders. It is  
7 anticipated that the MAP ALLIANCE study will lead to recommendations for  
8 accessible, integrated care acceptable to women. It will assist NHS commissioners  
9 and providers in designing and transforming services for perinatal women. This will  
10 increase the chances for women to receive better care to improve maternal and child  
11 outcomes [51].  
12  
13

## 14 Conclusion

15  
16 However, as depression during pregnancy is strongly associated with both PND and  
17 anxiety following childbirth, study articles that found preventative treatment  
18 interventions to be cost-effective were included and reviewed. The findings from this  
19 review show that the costs of not intervening in maternal mental health far outweigh  
20 the costs of preventative interventions. Maternal mental health has significant long-  
21 term economic consequences in which children are affected well into adulthood  
22 regarding cognitive, psychological, and physical development, education, and career  
23 through the life-course [9,10]. Preventative measures, such as screening, combined  
24 with treatment, such as counselling, for maternal mental health are proven to be  
25 cost-effective interventions to improve outcomes for women and children.  
26  
27  
28  
29

## 30 Recommendations

31 It is recommended that:

- 32 • Mothers should be screened for maternal mental health issues to identify  
33 mothers at risk and provide treatment, leading to better outcomes for the  
34 mother and child dyad.
- 35 • Studies focussing on interventions for perinatal anxiety as distinct condition to  
36 other mental health issues such as depression should be conducted.
- 37 • The cost of interventions to reduce perinatal anxiety should be carried out.  
38  
39

40  
41  
42 **Acknowledgements:** The authors thank the wider MAP ALLIANCE team from City  
43 University of London and University of Stirling for input into the development of this  
44 review. We would also like to thank Yasmine Noorani, Academic Support Librarian at  
45 Bangor University, for her assistance in creating our search strategy. Additional  
46 thanks to Dr Catherine Lawrence for early input and feedback on this paper.  
47  
48

49 **Contributors:** The review was conceived by RTE, and the protocol was developed  
50 by LT, KP and LHS [18]; searches were undertaken by KP; article screening was  
51 carried out by KP and LHS with mediation by LT; quality appraisal was undertaken  
52 by KP, LHS and LT; data were interpreted by all authors; the manuscript was drafted  
53 by KP and LHS and critically reviewed by all authors.  
54

55 **Funding:** This review is to compliment the MAP ALLIANCE study, funded by the  
56 National Institute for Health and Care Research (NIHR) (Award ID: NIHR133727).  
57

58 **Conflict of interest:** All authors declare that they have no conflicts of interest.  
59  
60

1  
2  
3 **Ethical approval:**

4 This study does not involve human participants.  
5  
6

7 **Data statement:** Data extraction tables are available from the corresponding author  
8 on request.  
9  
10  
11  
12  
13  
14  
15  
16  
17  
18  
19  
20  
21  
22  
23  
24  
25  
26  
27  
28  
29  
30  
31  
32  
33  
34  
35  
36  
37  
38  
39  
40  
41  
42  
43  
44  
45  
46  
47  
48  
49  
50  
51  
52  
53  
54  
55  
56  
57  
58  
59  
60

For peer review only

## References

- [1] Akobeng AK. Principles of evidence based medicine. *Arch Dis Child* 2005;90:837–40. <https://doi.org/10.1136/adc.2005.071761>.
- [2] NHS England and NHS Improvement. *The Perinatal Mental Health Care Pathways NHS England and NHS Improvement*. 2018.
- [3] Bauer A, Personage M, Knapp M, Lemmi V, Adeleja B. *Costs of perinatal mental health problems*. London: 2014.
- [4] Petrou S, Cooper P, Murray L, Davidson LL, Lawson C, Woolgar M, et al. Cost-effectiveness of a preventive counseling and support package for postnatal depression. *Int J Technol Assess Health Care* 2006;22:443–53. <https://doi.org/10.1017/S0266462306051361>.
- [5] Wilkinson A, Anderson S, Wheeler SB. Screening for and Treating Postpartum Depression and Psychosis: A Cost-Effectiveness Analysis. *Matern Child Health J* 2017;21:903–14. <https://doi.org/10.1007/s10995-016-2192-9>.
- [6] Howard LM, Flach C, Mehay A, Sharp D, Tylee A. The prevalence of suicidal ideation identified by the Edinburgh Postnatal Depression Scale in postpartum women in primary care: Findings from the RESPOND trial. *BMC Pregnancy Childbirth* 2011;11. <https://doi.org/10.1186/1471-2393-11-57>.
- [7] Kotlar B, Gerson E, Petrillo S, Langer A, Tiemeier H. The impact of the COVID-19 pandemic on maternal and perinatal health: a scoping review. *Reprod Health* 2021;18. <https://doi.org/10.1186/S12978-021-01070-6>.
- [8] Pilav S, Easter A, Silverio SA, de Backer K, Sundares S, Roberts S, et al. Experiences of Perinatal Mental Health Care among Minority Ethnic Women during the COVID-19 Pandemic in London: A Qualitative Study. *Int J Environ Res Public Health* 2022;19. <https://doi.org/10.3390/IJERPH19041975>.
- [9] Bauer A, Pawlby S, Plant DT, King D, Pariante CM, Knapp M. Perinatal depression and child development: Exploring the economic consequences from a South London cohort. *Psychol Med* 2015;45:51–61. <https://doi.org/10.1017/S0033291714001044>.
- [10] Moore Simas TA, Huang MY, Packnett ER, Zimmerman NM, Moynihan M, Eldar-Lissai A. Matched cohort study of healthcare resource utilization and costs in young children of mothers with postpartum depression in the United States. *J Med Econ* 2020;23:174–83. <https://doi.org/10.1080/13696998.2019.1679157>.
- [11] Giallo R, Woolhouse H, Gartland D, Hiscock H, Brown S. The emotional–behavioural functioning of children exposed to maternal depressive symptoms across pregnancy and early childhood: a prospective Australian pregnancy cohort study. *Eur Child Adolesc Psychiatry* 2015;24:1233–44. <https://doi.org/10.1007/s00787-014-0672-2>.

- 1  
2  
3 [12] Hardcastle K, Bellis MA, Ford K, Hughes K, Garner J, Ramos Rodriguez G.  
4 Measuring the relationships between adverse childhood experiences and  
5 educational and employment success in England and Wales: findings from a  
6 retrospective study. *Public Health* 2018;165:106–16.  
7 <https://doi.org/10.1016/J.PUHE.2018.09.014>.  
8  
9  
10 [13] Posmontier B, Neugebauer R, Stuart S, Chittams J, Shaughnessy R.  
11 Telephone-Administered Interpersonal Psychotherapy by Nurse-Midwives for  
12 Postpartum Depression. *J Midwifery Womens Health* 2016;61:456–66.  
13 <https://doi.org/10.1111/JMWH.12411>.  
14  
15 [14] Zheng Q, Shi L, Zhu L, Jiao N, Chong YS, Chan SWC, et al. Cost-  
16 effectiveness of Web-Based and Home-Based Postnatal Psychoeducational  
17 Interventions for First-time Mothers: Economic Evaluation Alongside  
18 Randomized Controlled Trial. *J Med Internet Res* 2022;24.  
19 <https://doi.org/10.2196/25821>.  
20  
21 [15] National Institute for Health and Care Excellence. Maternity and mental health  
22 2022. [https://www.nice.org.uk/about/what-we-do/into-practice/measuring-the-  
23 use-of-nice-guidance/impact-of-our-guidance/niceimpact-maternity/ch2-  
24 maternity-and-mental-health](https://www.nice.org.uk/about/what-we-do/into-practice/measuring-the-use-of-nice-guidance/impact-of-our-guidance/niceimpact-maternity/ch2-maternity-and-mental-health) (accessed July 27, 2022).  
25  
26 [16] Maternal Mental Health Alliance. Map of Specialist Community Perinatal  
27 Mental Health Teams (UK). 2020.  
28  
29 [17] The National Institute of Health and Care Excellence. NICE | The National  
30 Institute for Health and Care Excellence 2022. <https://www.nice.org.uk/>  
31 (accessed February 9, 2022).  
32  
33 [18] Spencer LH, Pisavadia K, Tuersley L, Edwards RT. A structured review of the  
34 costs and services for perinatal anxiety and associated disorders: MAP  
35 ALLIANCE. PROSPERO 2022 CRD42022347859. PROSPERO 2022.  
36  
37 [19] Page M, McKenzie J, Bossuyt P, Boutron I, Hoffmann T, Mulrow C. The  
38 PRISMA 2020 statement: an updated guideline for reporting systematic  
39 reviews. *BMJ* 2021. *BMJ* 2021. <https://doi.org/doi:10.1136/bmj.n71>.  
40  
41 [20] Health and Care Research Wales. Impact of the COVID-19 pandemic on the  
42 health and access to health care of disabled people: a rapid review 2022.  
43 [https://healthandcareresearchwales.org/impact-covid-19-pandemic-disabled-  
44 people](https://healthandcareresearchwales.org/impact-covid-19-pandemic-disabled-people) (accessed May 10, 2022).  
45  
46 [21] Health and Care Research Wales. Modelling studies used to evaluate the  
47 effect of population-level non-pharmaceutical interventions on the reproduction  
48 number of Severe Acute Respiratory Syndrome Coronavirus 2 (SARS-CoV-2)  
49 2022. [https://healthandcareresearchwales.org/modelling-studies-used-  
50 evaluate-effect-population-level-non-pharmaceutical-interventions](https://healthandcareresearchwales.org/modelling-studies-used-evaluate-effect-population-level-non-pharmaceutical-interventions) (accessed  
51 May 10, 2022).  
52  
53  
54  
55  
56  
57  
58  
59  
60

- 1  
2  
3 [22] Tricco AC, Khalil H, Holly C, Feyissa G, Godfrey C, Evans C, et al. Rapid  
4 reviews and the methodological rigor of evidence synthesis. *JB I Evid Synth*  
5 2022;Publish Ah:944–9. <https://doi.org/10.11124/jbies-21-00371>.  
6  
7 [23] Schardt C, Adams MB, Owens T, Keitz S, Fontelo P. Utilization of the PICO  
8 framework to improve searching PubMed for clinical questions. *BMC Med*  
9 *Inform Decis Mak* 2007;7:1–6.  
10  
11 [24] Drummond MF, Sculpher MJ, Claxton K, Stoddart GL, Torrance G W. *Methods*  
12 *for the economic evaluation of health care programmes*. 4th ed. Oxford: Oxford  
13 University Press; 2015.  
14  
15 [25] Moons KGM, de Groot JAH, Bouwmeester W, Vergouwe Y, Mallett S, Altman  
16 DG, et al. Critical Appraisal and Data Extraction for Systematic Reviews of  
17 Prediction Modelling Studies: The CHARMS Checklist. *PLoS Med* 2014;11.  
18 <https://doi.org/10.1371/journal.pmed.1001744>.  
19  
20 [26] Aromataris E, Fernandez R, Godfrey C, Holly C, Kahlil H, Tungpunkom P.  
21 Summarizing systematic reviews: methodological development, conduct and  
22 reporting of an Umbrella review approach. *Int J Evid Based Healthc* 2015  
23 2015;13:132–40.  
24  
25 [27] Tufanaru C, Munn Z, Aromataris E, Campbell J, Hopp L. Systematic reviews of  
26 effectiveness. In: Aromataris E, Munn Z, editors. *JB I Manual for Evidence*  
27 *Synthesis*, JBI; 2020.  
28  
29 [28] Moola S, Munn Z, Tufanaru C, Aromataris E, Sears K, Sfetcu R, et al.  
30 Systematic reviews of etiology and risk. In: Aromataris E, Munn Z, editors.  
31 *Manual for Evidence Synthesis*, JBI; 2020.  
32  
33 [29] Grote NK, Simon GE, Russo J, Lohr MJ, Carson K, Katon W. Incremental  
34 benefit-cost of MOMCare: Collaborative care for perinatal depression among  
35 economically disadvantaged women. *Psychiatric Services* 2017;68:1164–71.  
36 <https://doi.org/10.1176/APPI.PS.201600411>.  
37  
38 [30] Chojenta C, William J, Martin MA, Byles J, Loxton D. The impact of a history of  
39 poor mental health on health care costs in the perinatal period. *Arch Womens*  
40 *Ment Health* 2019;22:467–73. <https://doi.org/10.1007/S00737-018-0912-4>.  
41  
42 [31] Camacho EM, Shields GE. Cost-effectiveness of interventions for perinatal  
43 anxiety and/or depression: A systematic review. *BMJ Open* 2018;8.  
44 <https://doi.org/10.1136/bmjopen-2018-022022>.  
45  
46 [32] Ride J, Lorgelly P, Tran T, Wynter K, Rowe H, Fisher J. Preventing postnatal  
47 maternal mental health problems using a psychoeducational intervention: the  
48 cost-effectiveness of What Were We Thinking. *BMJ Ope* 2016;6.  
49 <https://doi.org/10.1136/bmjopen-2016>.  
50  
51 [33] Ammerman RT, Chen J, Mallow PJ, Rizzo JA, Folger AT, van Ginkel JB.  
52 Annual direct health care expenditures and employee absenteeism costs in  
53 high-risk, low-income mothers with major depression. *J Affect Disord*  
54 2016;190:386–94. <https://doi.org/10.1016/J.JAD.2015.10.025>.  
55  
56  
57  
58  
59  
60

- 1  
2  
3 [34] Counts NZ, Kuklinski MR, Wong V, Feinberg ME, Creedon TB. Comparison of  
4 Estimated Incentives for Preventing Postpartum Depression in Value-Based  
5 Payment Models Using the Net Present Value of Care vs Total Cost of Care.  
6 JAMA Netw Open 2022;5:e229401.  
7 <https://doi.org/10.1001/JAMANETWORKOPEN.2022.9401>.  
8  
9  
10 [35] Dagher RK, McGovern PM, Dowd BE, Gjerdingen DK. Postpartum depression  
11 and health services expenditures among employed women. J Occup Environ  
12 Med 2012;54:210–5. <https://doi.org/10.1097/JOM.0B013E31823FDF85>.  
13  
14 [36] Franta G, Hersh AR, Cirino NH, Caughey AB. Prevention of perinatal  
15 depression with counseling in adolescents: a cost-effectiveness analysis. The  
16 Journal of Maternal-Fetal & Neonatal Medicine: The Official Journal of the  
17 European Association of Perinatal Medicine 2022.  
18 <https://doi.org/10.1080/14767058.2022.2049746>.  
19  
20 [37] Gurung B, Jackson LJ, Monahan M, Butterworth R, Roberts TE. Identifying  
21 and assessing the benefits of interventions for postnatal depression: A  
22 systematic review of economic evaluations. BMC Pregnancy Childbirth  
23 2018;18. <https://doi.org/10.1186/S12884-018-1738-9>.  
24  
25 [38] Henderson C, Dixon S, Bauer A, Knapp M, Jane Morrell C, Slade P, et al.  
26 Cost-effectiveness of PoNDER health visitor training for mothers at lower risk  
27 of depression: Findings on prevention of postnatal depression from a cluster-  
28 randomised controlled trial. Psychol Med 2019;49:1324–34.  
29 <https://doi.org/10.1017/S0033291718001940>.  
30  
31 [39] Morrell CJ, Sutcliffe P, Booth A, Stevens J, Scope A, Stevenson M, et al. A  
32 systematic review, evidence synthesis and meta-analysis of quantitative and  
33 qualitative studies evaluating the clinical effectiveness, the cost-effectiveness,  
34 safety and acceptability of interventions to prevent postnatal depression.  
35 Health Technol Assess 2016;20:1–414. <https://doi.org/10.3310/HTA20370>.  
36  
37 [40] Petrou S, Cooper P, Murray L, Davidson LL. Economic costs of post-natal  
38 depression in a high-risk British cohort. British Journal of Psychiatry  
39 2002;181:505–12. <https://doi.org/10.1192/bjp.181.6.505>.  
40  
41 [41] Roberts J, Sword W, Watt S, Gafni A, Krueger P, Sheehan D, et al. Costs of  
42 postpartum care examining associations from the Ontario mother and infant  
43 survey. Canadian Journal of Nursing Research 2001;33:19–34.  
44  
45 [42] Stevenson MD, Scope A, Sutcliffe PA. The Cost-Effectiveness of Group  
46 Cognitive Behavioral Therapy Compared with Routine Primary Care for  
47 Women with Postnatal Depression in the UK. Value in  
48 Health 2010;13:580–4. <https://doi.org/10.1111/j.1524-4733.2010.00720.x>.  
49  
50 [43] Moran PS, Wuytack F, Turner M, Normand C, Brown S, Begley C, et al.  
51 Economic burden of maternal morbidity – A systematic review of cost-of-illness  
52 studies. PLoS One 2020;15.  
53 <https://doi.org/10.1371/JOURNAL.PONE.0227377>.  
54  
55  
56  
57  
58  
59  
60

- 1  
2  
3 [44] Morrell CJ, Spiby H, Stewart P, Walters S, Morgan A. Costs and effectiveness  
4 of community postnatal support workers: Randomised controlled trial. *Br Med J*  
5 2000;321:593–8. <https://doi.org/10.1136/BMJ.321.7261.593>.  
6  
7 [45] Ride J. *Setting the Boundaries for Economic Evaluation: Investigating Time*  
8 *Horizon and Family Effects in the Case of Postnatal Depression* 2018.  
9 <https://doi.org/10.1016/j.jval.2017.10.016>.  
10  
11 [46] Henderson J. *The cost effectiveness of prenatal care* - ProQuest 1994.  
12 [https://www.proquest.com/assia/docview/196971225/abstract/36297FA264EA](https://www.proquest.com/assia/docview/196971225/abstract/36297FA264EA438FPQ/1?accountid=14874)  
13 [438FPQ/1?accountid=14874](https://www.proquest.com/assia/docview/196971225/abstract/36297FA264EA438FPQ/1?accountid=14874) (accessed May 21, 2022).  
14  
15 [47] Cox JL, Chapman G, Murray D, Jones P. Validation of the Edinburgh postnatal  
16 depression scale ( EPDS) in non-postnatal women. vol. 39. 1996.  
17  
18 [48] Ride J. *Setting the Boundaries for Economic Evaluation: Investigating Time*  
19 *Horizon and Family Effects in the Case of Postnatal Depression*. *Value in*  
20 *Health* 2018;21:573–80. <https://doi.org/10.1016/j.jval.2017.10.016>.  
21  
22 [49] Ware JE. SF-36 Health Survey Update. *Spine (Phila Pa 1976)* 2000;25:3130–  
23 9.  
24  
25 [50] Davis J, Ohan JL, Gibson LY, Prescott SL, Finlay-Jones AL. Understanding  
26 engagement in digital mental health and wellbeing programs for sub-clinical  
27 women in the perinatal period: A Systematic Review without Meta-Analysis  
28 (SWiM) (Preprint). *J Med Internet Res* 2022. <https://doi.org/10.2196/36620>.  
29  
30 [51] Ayers S, Coates R, Sinesi A, Best C, Shakespeare J, Hollins K, et al.  
31 *OptiMising cAre for Perinatal Anxiety: evaLUation of heaLth servlce utilisAtioN,*  
32 *outComEs and costs (MAP ALLIANCE) - NIHR Funding and Awards*. National  
33 Institute for Health and Care Research 2022.  
34 <https://fundingawards.nihr.ac.uk/award/NIHR133727> (accessed August 16,  
35 2022).  
36  
37 [52] U.S. Bureau of Labor Statistics. *CPI Inflation Calculator* 2022.  
38 [https://www.bls.gov/data/inflation\\_calculator.htm](https://www.bls.gov/data/inflation_calculator.htm) (accessed August 18, 2022).  
39  
40 [53] Reserve Bank of Australia 2022.  
41  
42 [54] Bank of England. *Inflation calculator* 2022.  
43 <https://www.bankofengland.co.uk/monetary-policy/inflation/inflation-calculator>  
44 (accessed August 18, 2022).  
45  
46 [55] Google. *Google currency converter* 2022.  
47 [https://www.google.com/search?q=currency+converter&rlz=1C1GCEA\\_enGB9](https://www.google.com/search?q=currency+converter&rlz=1C1GCEA_enGB991GB991&oq=currency+converter&aqs=chrome..69i57j0i10i131i433i2j0i10i7.4286j1j3&sourceid=chrome&ie=UTF-8)  
48 [991GB991&oq=currency+converter&aqs=chrome..69i57j0i10i131i433i2j0i10i7.4](https://www.google.com/search?q=currency+converter&rlz=1C1GCEA_enGB991GB991&oq=currency+converter&aqs=chrome..69i57j0i10i131i433i2j0i10i7.4286j1j3&sourceid=chrome&ie=UTF-8)  
49 [286j1j3&sourceid=chrome&ie=UTF-8](https://www.google.com/search?q=currency+converter&rlz=1C1GCEA_enGB991GB991&oq=currency+converter&aqs=chrome..69i57j0i10i131i433i2j0i10i7.4286j1j3&sourceid=chrome&ie=UTF-8) (accessed September 5, 2022).  
50  
51 [56] Bank of Canada. *Inflation Calculator* 2022.  
52 <https://www.bankofcanada.ca/rates/related/inflation-calculator/> (accessed  
53 August 18, 2022).  
54  
55  
56  
57  
58  
59  
60



1  
2  
3  
4  
5  
6  
7  
8  
9  
10  
11  
12  
13  
14  
15  
16  
17  
18  
19  
20  
21  
22  
23  
24  
25  
26  
27  
28  
29  
30  
31  
32  
33  
34  
35  
36  
37  
38  
39  
40  
41  
42  
43  
44  
45  
46  
47  
48  
49  
50  
51  
52  
53  
54  
55  
56  
57  
58  
59  
60

Figure 1. PRISMA study selection flowchart.

For peer review only

Figure 1. PRISMA study selection flowchart (Page et al., 2021b)

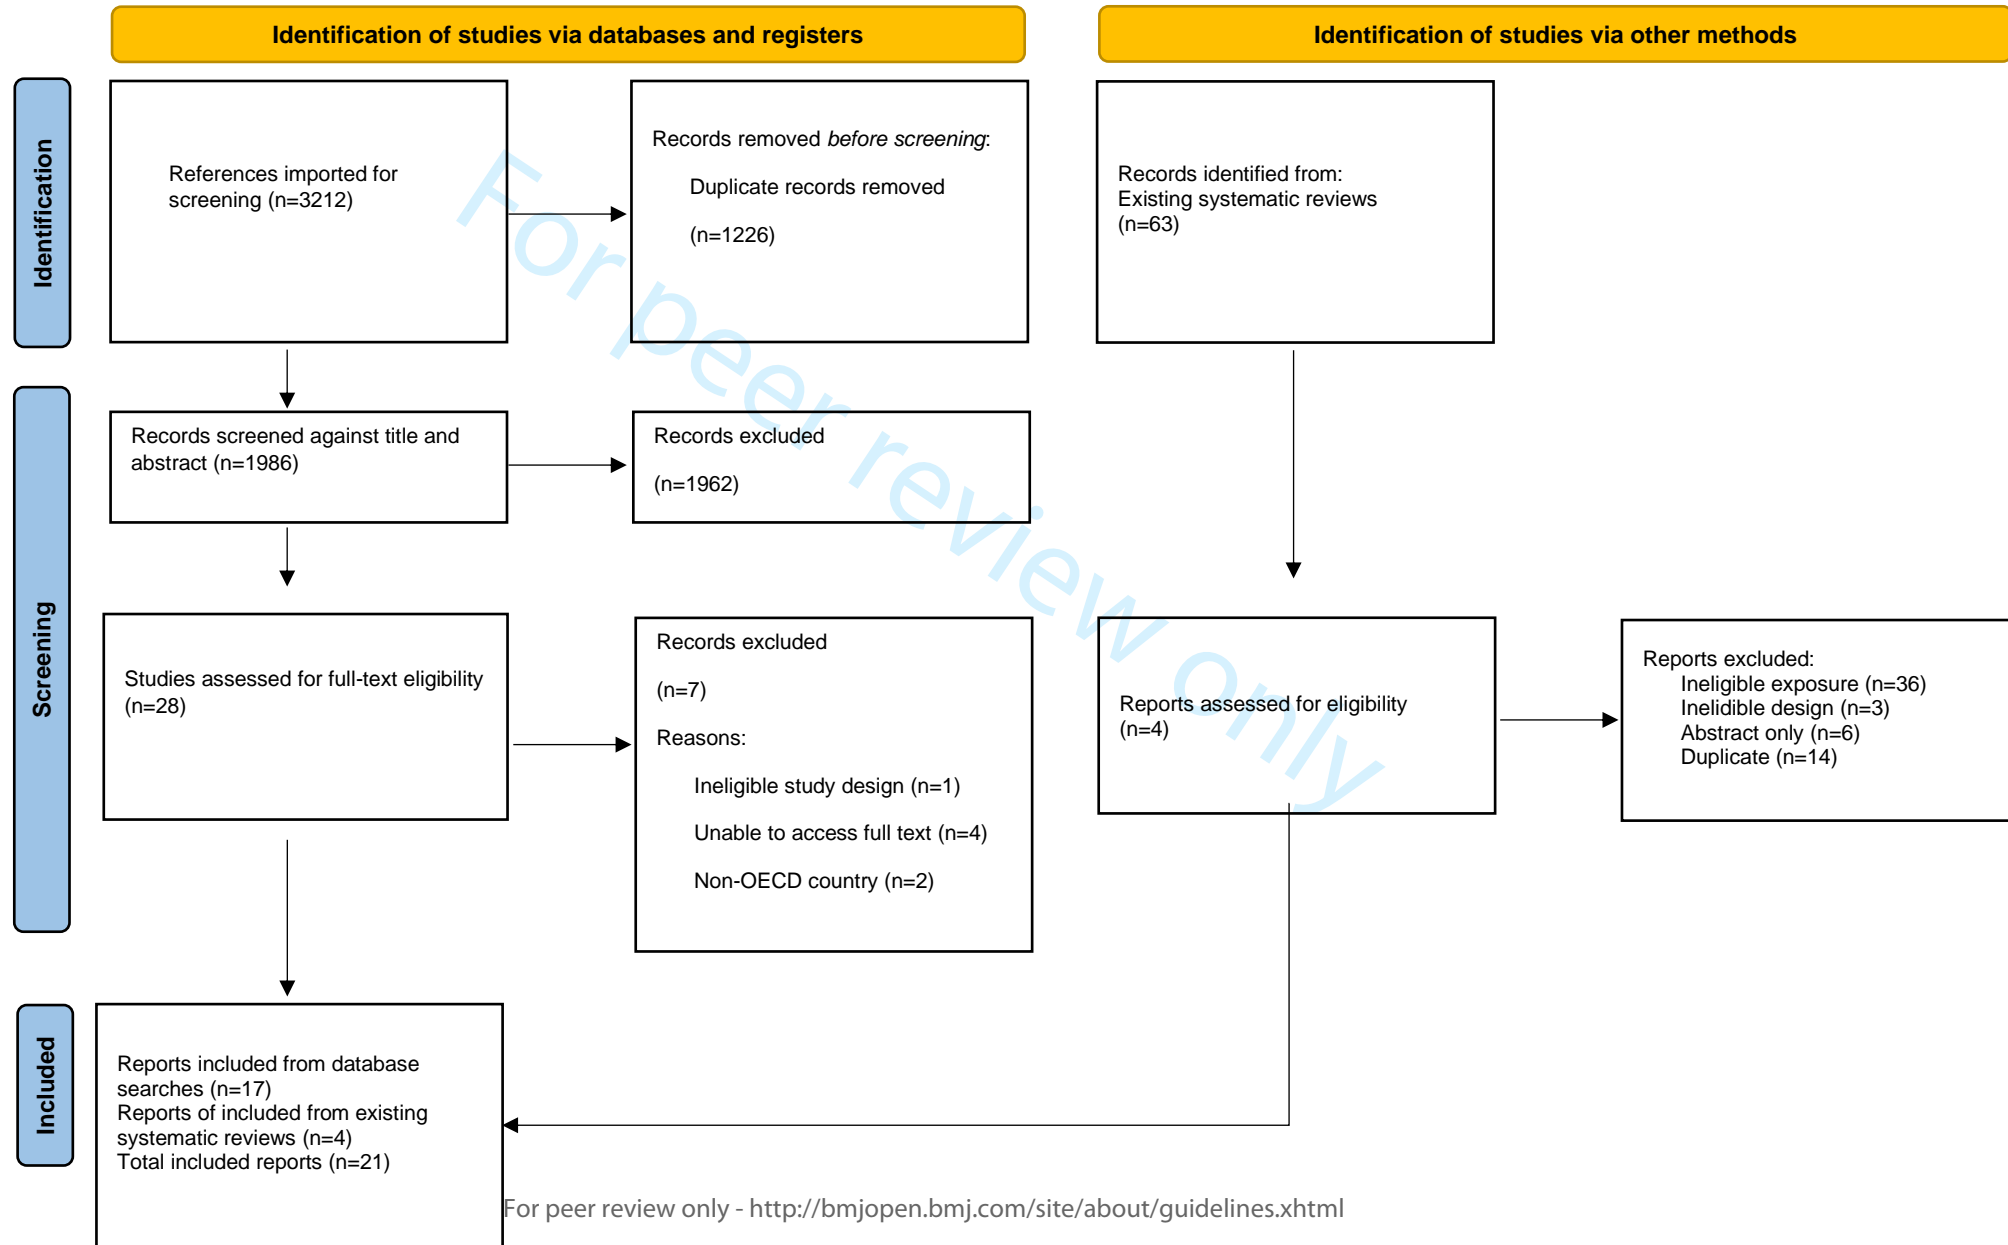

1  
2  
3  
4  
5  
6  
7  
8  
9  
10  
11  
12  
13  
14  
15  
16  
17  
18  
19  
20  
21  
22  
23  
24  
25  
26  
27  
28  
29  
30  
31  
32  
33  
34  
35  
36  
37  
38  
39  
40  
41  
42  
43  
44  
45  
46

The study selection flow chart is shown as a PRISMA flow chart (Page et al., 2021a)

*From:* Page MJ, McKenzie JE, Bossuyt PM, Boutron I, Hoffmann TC, Mulrow CD, et al. The PRISMA 2020 statement: an updated guideline for reporting systematic reviews. BMJ 2021;372:n71. doi: 10.1136/bmj.n71. For more information, visit: <http://www.prisma-statement.org/>

For peer review only

1  
2  
3  
4  
5  
6  
7  
8  
9  
10  
11  
12  
13  
14  
15  
16  
17  
18  
19  
20  
21  
22  
23  
24  
25  
26  
27  
28  
29  
30  
31  
32  
33  
34  
35  
36  
37  
38  
39  
40  
41  
42  
43  
44  
45  
46

For peer review only

Table 3: Data extraction table for studies including perinatal anxiety

| Citation (Country)                                    | Study Details                                                                                                                                                                                                                                                                                                                                                                                                                                                                                                             | Participants and setting                                                                                                                                                                                                                                                                                                                                                                                                                                      | Key findings                                                                                                                                                                                                                                                                                                                                                                                                                                                                                                                                                                                                                                                                                                                                                                                                                                                                                                                                                                                                                                      | Observations                                                                                                                                                                                                                                                                                                                                                                                                                                                         |
|-------------------------------------------------------|---------------------------------------------------------------------------------------------------------------------------------------------------------------------------------------------------------------------------------------------------------------------------------------------------------------------------------------------------------------------------------------------------------------------------------------------------------------------------------------------------------------------------|---------------------------------------------------------------------------------------------------------------------------------------------------------------------------------------------------------------------------------------------------------------------------------------------------------------------------------------------------------------------------------------------------------------------------------------------------------------|---------------------------------------------------------------------------------------------------------------------------------------------------------------------------------------------------------------------------------------------------------------------------------------------------------------------------------------------------------------------------------------------------------------------------------------------------------------------------------------------------------------------------------------------------------------------------------------------------------------------------------------------------------------------------------------------------------------------------------------------------------------------------------------------------------------------------------------------------------------------------------------------------------------------------------------------------------------------------------------------------------------------------------------------------|----------------------------------------------------------------------------------------------------------------------------------------------------------------------------------------------------------------------------------------------------------------------------------------------------------------------------------------------------------------------------------------------------------------------------------------------------------------------|
| Camacho and Shields (2018)<br>[31]<br>UK              | <p><b>Study Design:</b> SR of Cost-effectiveness studies of interventions for perinatal anxiety and/or depression</p> <p><b>Type of intervention [exposure]:</b> Perinatal anxiety and/or depression (PND)</p> <p><b>Data collection methods:</b> Search strategy within MEDLINE, PsycINFO and NHS Economic Evaluation and Health Technology Assessment databases</p>                                                                                                                                                     | <p><b>Sample size:</b> 8 studies were included in the SR.</p> <p><b>Participants:</b> Mothers</p> <p><b>Setting:</b> Maternal health care setting in the UK.</p> <p><b>Dates of data collection:</b> January 2000 to September 2017.</p>                                                                                                                                                                                                                      | <p><b>Primary Findings:</b></p> <ul style="list-style-type: none"> <li>8 studies met the inclusion criteria for the review: all but one focussed solely on PND in mothers.</li> <li>Interventions included prevention (n=3), treatment (n=3) or identification plus treatment (n=2).</li> <li>Two interventions were likely to be cost-effective, both incorporated identification plus treatment. Where the cost per QALY gained was reported, interventions ranged from being dominant (cheaper and more effective than usual care) to costing £39,875/QALY.</li> </ul>                                                                                                                                                                                                                                                                                                                                                                                                                                                                         | <p>This SR from the UK found that two interventions were likely to be cost-effective, in which both incorporated identification plus treatment of PND. These treatments included health visitor screening with counselling, GP and psychiatrist collaborative screening and treatment. This systematic review also found that psychiatric day hospital treatment, health visitor counsellors, and telephone-delivered peer support were possibly cost-effective.</p> |
| Ride et al (2016)<br>(Ride et al., 2016)<br>Australia | <p><b>Study Design:</b> Economic evaluation, including cost-effectiveness and cost-utility analyses, conducted alongside a cluster-randomised trial</p> <p><b>Type of intervention [exposure]:</b> What Were We Thinking (WWWT) - a psychoeducational intervention targeted at the partner relationship, management of infant behaviour and parental fatigue.</p> <p><b>Data collection methods:</b> Data were collected from participants via computer-assisted telephone interview at baseline (6 weeks postpartum)</p> | <p><b>Sample size:</b> 359</p> <p><b>Participants:</b> English-speaking first-time mothers who had recently given birth and attended participating Maternal and Child Health Centres (MCHCs)</p> <p><b>Setting:</b> 48 Maternal and Child Health Centres in Victoria, Australia.</p> <p><b>Dates of data collection:</b> Baseline interviews took place between May 2013 and April 2014, and follow-up interviews between September 2013 and August 2014.</p> | <p><b>Primary Findings:</b><br/>           The intervention was estimated to cost \$A118.16 per participant. The analysis showed no statistically significant difference between the intervention and control groups in costs or outcomes. The incremental cost-effectiveness ratios were \$A36 451 per QALY gained and \$A152 per percentage point reduction in 30-day prevalence of depression, anxiety and adjustment disorders. The estimate lies under the unofficial cost-effectiveness threshold of \$A55 000 per QALY; however, there was considerable uncertainty surrounding the results, with a 55% probability that WWWT would be considered cost-effective at that threshold</p> <p><b>Additional Findings:</b><br/>           The results suggest that, although WWWT shows promise as a preventive intervention for postnatal maternal mental health problems, further research is required to reduce the uncertainty over its cost-effectiveness as there were no statistically significant differences in costs or outcomes.</p> | <p>Cost-effectiveness analysis of the intervention, What Were We Thinking (WWWT), for the prevention of postnatal maternal mental health problems</p>                                                                                                                                                                                                                                                                                                                |

|  |                                      |  |  |  |
|--|--------------------------------------|--|--|--|
|  | and follow-up (26 weeks postpartum). |  |  |  |
|--|--------------------------------------|--|--|--|

Table 4: Data extraction table for cross-sectional studies including maternal depression

| Citation (Country)                                      | Study Details                                                                                                                                                                                                                                                                           | Participants and setting                                                                                                                                                                                                                                       | Key findings                                                                                                                                                                                                                                                                                                                                                                                                                                                                                                                                               | Observations                                                                                                                                                                                                                                                                                                                                                                                                                                                                                                                    |
|---------------------------------------------------------|-----------------------------------------------------------------------------------------------------------------------------------------------------------------------------------------------------------------------------------------------------------------------------------------|----------------------------------------------------------------------------------------------------------------------------------------------------------------------------------------------------------------------------------------------------------------|------------------------------------------------------------------------------------------------------------------------------------------------------------------------------------------------------------------------------------------------------------------------------------------------------------------------------------------------------------------------------------------------------------------------------------------------------------------------------------------------------------------------------------------------------------|---------------------------------------------------------------------------------------------------------------------------------------------------------------------------------------------------------------------------------------------------------------------------------------------------------------------------------------------------------------------------------------------------------------------------------------------------------------------------------------------------------------------------------|
| Ammerman et al (2016)<br>(Ammerman et al., 2016)<br>USA | <b>Study design:</b> Cross-sectional<br><br><b>Data collection methods:</b> MEPS database, a subset of the National Health Interview Survey (NHIS) that includes information on health care utilisation and expenditures for the civilian, non-institutionalised population in the USA. | <b>Sample size:</b> 20,531<br><br><b>Participants:</b> 2,310 high-risk mothers with depression and 18,221 high-risk mothers without depression<br><br><b>Setting:</b> USA healthcare setting<br><br><b>Dates of data collection:</b> 1996 to 2011              | <b>Primary findings:</b><br>Depressed mothers were more likely to incur insurer (0.88 vs. 0.80) and out of pocket expenses (0.86 vs. 0.77) and to have higher insurer expenses (\$4916 vs. \$3521) and out of pocket expenses (\$786 vs. \$522) (in 2015).<br><b>Additional findings:</b><br>A higher proportion of the depressed sample was Caucasian and in relatively worse health than women from other ethnic groups. The depressed sample was more likely to have public insurance, to be English-speaking and to have a usual health care provider. | This cross-sectional study from the USA conducted between 2006 and 2011 investigated the out-of-pocket expenses and insurer expenses of depressed vs non-depressed mothers. Depressed mothers were more likely to incur insurer and out of pocket expenses and to have higher insurer expenses (\$4916 vs. \$3521) and out of pocket expenses (\$786 vs. \$522) (in 2015).                                                                                                                                                      |
| Dagher et al (2012)<br>(Dagher et al., 2012)<br>USA     | <b>Study design:</b> Cross-sectional<br><br><b>Data collection methods:</b> Prices of service use and EPDS                                                                                                                                                                              | <b>Sample size:</b> 638 women.<br><br><b>Participants:</b> Women receiving maternal healthcare services, from hospital discharge to 11 weeks postpartum.<br><br><b>Setting:</b> USA healthcare setting.<br><br><b>Dates of data collection:</b> The year 2001. | <b>Primary findings:</b><br>The total cost of all mental health counselling visits for the depressed group n =31 was \$138 and the cost for the non-depressed group n= 607 was \$13. This was a statistically significant difference (p < 0.001).<br><br><b>Additional findings:</b> The total cost of emergency department visits for the postpartum women was \$84 for the depressed group n = 31 and \$13 for the non-depressed group n = 607. This was a statistically significant difference (p < 0.001).                                             | The Dagher et al., (2012) cross-sectional study from the USA investigated expenditure from health care service from discharge until 11 weeks postpartum. There was a significant difference in healthcare expenditure between depressed and non-depressed women. The EPDS was used to measure depression. The total cost of all mental health counselling visits for the depressed group n =31 was \$138 and the cost for the non-depressed group n= 607 was \$13. This was a statistically significant difference (p < 0.001). |

Table 5: Data extraction table for economic evaluations on maternal depression

| Citation (Country)                                          | Study Details                                                                                                                                                                                                                                                                                                                                                                                                                                                                                                                                                                                                                                                                                                                                           | Participants and setting                                                                                                                                                                                                                                            | Key findings                                                                                                                                                                                                                                                                                                                                                                                                                                                                                                                                                                                                                                                                                                                                                                                                                                                                                                                                                                               | Observations                                                                                                                                        |
|-------------------------------------------------------------|---------------------------------------------------------------------------------------------------------------------------------------------------------------------------------------------------------------------------------------------------------------------------------------------------------------------------------------------------------------------------------------------------------------------------------------------------------------------------------------------------------------------------------------------------------------------------------------------------------------------------------------------------------------------------------------------------------------------------------------------------------|---------------------------------------------------------------------------------------------------------------------------------------------------------------------------------------------------------------------------------------------------------------------|--------------------------------------------------------------------------------------------------------------------------------------------------------------------------------------------------------------------------------------------------------------------------------------------------------------------------------------------------------------------------------------------------------------------------------------------------------------------------------------------------------------------------------------------------------------------------------------------------------------------------------------------------------------------------------------------------------------------------------------------------------------------------------------------------------------------------------------------------------------------------------------------------------------------------------------------------------------------------------------------|-----------------------------------------------------------------------------------------------------------------------------------------------------|
| Bauer et al (2015)<br><br>(Bauer et al., 2015)<br><br>UK    | <b>Study Design:</b> The economic analysis takes a life-course perspective from the viewpoints of the public sector, individual and society. The study analysed the effects of perinatal depression on child development outcomes of children at ages 11 and 16 years from the community-based South London Child Development Study. Economic consequences were attached to those outcomes through simple decision-analytic techniques, building on evidence from studies of epidemiology, health-related quality of life, public sector costs and employment.                                                                                                                                                                                          | <b>Sample size:</b> 120<br><br><b>Participants:</b> Mothers and children<br><br><b>Setting:</b> Two antenatal clinics in the UK<br><br><b>Dates of data collection:</b> January to December 1986                                                                    | <b>Primary Findings:</b><br>Additional risks that children exposed to perinatal depression develop emotional, behavioural or cognitive problems ranged from 5% to 21%. In addition, there was a high risk (24%) that children would have special educational needs.<br><br>For each child exposed to perinatal depression, public sector costs exceeded £3,030, costs due to reduced earnings were £1,400 and health-related quality of life loss was valued at £3,760.                                                                                                                                                                                                                                                                                                                                                                                                                                                                                                                    | The study examined some of the outcomes and long-term economic implications experienced by offspring who have been exposed to perinatal depression. |
| Counts et al (2022)<br><br>(Counts et al., 2022)<br><br>USA | <b>Study Design:</b> Modelling study. A decision analytic model used a simulated cohort of 1,000 Medicaid-enrolled pregnant individuals. Health care costs for individuals receiving postpartum depression preventive intervention or not, over 1 or 5 years postpartum, in a variety of scenarios, including varying rates of Medicaid churn (i.e., transitions to a new Medicaid managed care plan, commercial insurance plan, or loss of coverage) were estimated for the period 2020 to 2025. The model was developed between March 5 2021 and July 30 2021.<br><br><b>Type of intervention [exposure]:</b> Individual counselling and group-based counselling.<br><br><b>Data collection methods:</b> Simulation based on collected Medicaid data. | <b>Sample size:</b> 1,000<br><br><b>Participants:</b> simulated cohort of 1,000 Medicaid enrolled pregnant individuals<br><br><b>Setting:</b> USA healthcare system.<br><br><b>Dates of data collection:</b> Model developed between March 5 2021 and July 30 2021. | <b>Primary Findings:</b><br>The main outcome was the amount of clinician incentive shared in a Value-based payment (VBP) model from providing preventive interventions. The likelihood of the health care payer realising a positive return on investment if it shared 50% of 5-year expected savings with a clinician up front was also measured.<br><br>The simulated cohort was designed to be reflective of the demographics characteristics of pregnant individuals receiving Medicaid; however, no specific demographic features were simulated. Providing preventive interventions for postpartum depression resulted in an estimated 5-year savings of \$734.12 (95% credible interval [CrI], \$217.21-\$1235.67) per person. Without health insurance churn, sharing 50% of 5-year expected savings could offer more than double the financial incentives for clinicians to prevent postpartum depression compared with traditional VBP (\$367.06 [95% CrI, \$108.61-\$617.83] vs | This economic modelling study found that providing preventive interventions for PND resulted in an estimated 5-year saving of £602 <sup>□</sup>     |

|                                                               |                                                                                                                                                                                                                                                                                                   |                                                                                                                                                                                                                                             |                                                                                                                                                                                                                                                                                                                                                                                                                                                                                                                                                                                                                                                                                                                                                                                                                                                                                        |                                                                                                                                                                               |
|---------------------------------------------------------------|---------------------------------------------------------------------------------------------------------------------------------------------------------------------------------------------------------------------------------------------------------------------------------------------------|---------------------------------------------------------------------------------------------------------------------------------------------------------------------------------------------------------------------------------------------|----------------------------------------------------------------------------------------------------------------------------------------------------------------------------------------------------------------------------------------------------------------------------------------------------------------------------------------------------------------------------------------------------------------------------------------------------------------------------------------------------------------------------------------------------------------------------------------------------------------------------------------------------------------------------------------------------------------------------------------------------------------------------------------------------------------------------------------------------------------------------------------|-------------------------------------------------------------------------------------------------------------------------------------------------------------------------------|
|                                                               |                                                                                                                                                                                                                                                                                                   |                                                                                                                                                                                                                                             | \$177.74 [95% CrI, \$52.66-\$296.60], respectively), with a high likelihood of positive return for the health care payer (91%). As health insurance churn increased, clinician incentives from sharing estimated savings decreased (73% reduction with 50% annual churn).                                                                                                                                                                                                                                                                                                                                                                                                                                                                                                                                                                                                              |                                                                                                                                                                               |
| Franta et al (2022)<br>(Franta et al., 2022)<br>USA           | <p><b>Study Design:</b> Modelling study</p> <p><b>Type of intervention [exposure]:</b> Comparison of outcomes in pregnant adolescents who received versus did not receive counselling interventions</p> <p><b>Data collection methods:</b> Decision-analytic model using TreeAge Pro software</p> | <p><b>Sample size:</b> Theoretical cohort of 180,000 individuals</p> <p><b>Participants:</b> pregnant adolescents</p> <p><b>Setting:</b> Obstetric setting</p> <p><b>Dates of data collection:</b> 2018</p>                                 | <p><b>Primary Findings:</b></p> <ul style="list-style-type: none"> <li>A strategy of referral to counselling interventions was cost effective in the theoretical cohort, with 8,935 fewer cases of perinatal depression, 1,606 fewer cases of chronic depression, 166 fewer preterm deliveries, 4 fewer neonatal deaths, 1 fewer case of cerebral palsy, 20 fewer cases of SIDS. In total, there were 21,976 additional QALYs and cost savings of \$223,549,872, making it the dominant strategy (better outcomes with lower costs).</li> <li>Counselling interventions remained cost saving until the annual direct and indirect cost of chronic, severe depression was set below \$30,000, at which point it became cost effective (baseline input: \$182,309).</li> <li>It is cost effective to refer all pregnant adolescents for preventive counselling interventions.</li> </ul> | Using a theoretical cohort, Franta et al. (2022) found that counselling was a cost-effective preventative measure, leading to fewer cases of perinatal and chronic depression |
| Moore Simas et al (2020)<br>(Moore Simas et al., 2020)<br>USA | <p><b>Study Design:</b> Cohort study – economic evidence</p> <p><b>Type of intervention [exposure]:</b> PND.</p> <p><b>Data collection methods:</b> Administrative claims data from the IBM Watson Health MarketScan Databases</p>                                                                | <p><b>Sample size:</b> 135,678</p> <p><b>Participants:</b> mother-child pairs with and without postpartum depression (PND) exposure</p> <p><b>Setting:</b> USA healthcare setting.</p> <p><b>Dates of data collection:</b> 2010 to 2016</p> | <p><b>Primary Findings:</b></p> <ul style="list-style-type: none"> <li>33,314 mother-child pairs with PND exposure were propensity score matched to 102,364 mother-child pairs without PND exposure.</li> <li>During the 24-month follow-up period, HRU across most service categories was significantly higher among children in the PND exposure cohort than non-PND exposure cohort.</li> <li>Among outpatient services, the percentages of children with a physician specialist service (68% versus 64%), early-intervention screening (40% versus 37%), and an emergency room visit (48% versus 42%)</li> </ul>                                                                                                                                                                                                                                                                   | This cohort study assessed healthcare resource utilization (HRU) and costs in children of mothers with and without PND                                                        |



1  
2  
3  
4  
5  
6  
7  
8  
9  
10  
11  
12  
13  
14  
15  
16  
17  
18  
19  
20  
21  
22  
23  
24  
25  
26  
27  
28  
29  
30  
31  
32  
33  
34  
35  
36  
37  
38  
39  
40  
41  
42  
43  
44  
45  
46

|                                                                              |                                                                                                                                                                                                                                                                                                                                                                                                                                                                                                                                                                                                                                                                                                                                                                                                                                                                                                                                                                                                                                                                  |                                                                                                                                                                                                                     |                                                                                                                                                                                                                                                                                                                                                                                                                                                                                                                                                                                                                                                                                                                                                                                                                                                                                 |                                                                                                                                          |
|------------------------------------------------------------------------------|------------------------------------------------------------------------------------------------------------------------------------------------------------------------------------------------------------------------------------------------------------------------------------------------------------------------------------------------------------------------------------------------------------------------------------------------------------------------------------------------------------------------------------------------------------------------------------------------------------------------------------------------------------------------------------------------------------------------------------------------------------------------------------------------------------------------------------------------------------------------------------------------------------------------------------------------------------------------------------------------------------------------------------------------------------------|---------------------------------------------------------------------------------------------------------------------------------------------------------------------------------------------------------------------|---------------------------------------------------------------------------------------------------------------------------------------------------------------------------------------------------------------------------------------------------------------------------------------------------------------------------------------------------------------------------------------------------------------------------------------------------------------------------------------------------------------------------------------------------------------------------------------------------------------------------------------------------------------------------------------------------------------------------------------------------------------------------------------------------------------------------------------------------------------------------------|------------------------------------------------------------------------------------------------------------------------------------------|
|                                                                              |                                                                                                                                                                                                                                                                                                                                                                                                                                                                                                                                                                                                                                                                                                                                                                                                                                                                                                                                                                                                                                                                  |                                                                                                                                                                                                                     | <p>were greater in children of mothers with PND (all <math>p &lt; .001</math>).</p> <ul style="list-style-type: none"> <li>• Furthermore, children of mothers with PND incurred 12% higher total healthcare costs in the first 24 months of life compared to children of mothers without PND (\$24,572 versus \$21,946; <math>p &lt; .001</math>).</li> <li>• After excluding mothers with preterm delivery, the proportion of children with ER visits, physician specialist services, and outpatient pharmacy claims was significantly higher in the PND exposure cohort than non-PND exposure cohort (all <math>p &lt; .001</math>).</li> </ul> <p><b>Additional Findings:</b><br/>The results of this analysis suggest that HRU and costs over the first 24 months of life in children of mothers with PND exceeded that of children of mothers without evidence of PND.</p> |                                                                                                                                          |
| <p>Petrou et al (2002)<br/><br/>(Petrou et al., 2002)<br/><br/><b>UK</b></p> | <p><b>Study Design:</b> Economic evaluation in which unit costs were applied to resource-use data collected alongside a longitudinal study of women at high risk of developing PND. Unit costs were applied to estimates of health and social care resource use made by 206 women recruited from antenatal clinics and their infants. Net costs per mother-infant dyad over the first 18 months post-partum were estimated.</p> <p><b>Type of intervention [exposure]:</b> Preventative PND intervention.</p> <p><b>Data collection methods:</b> primiparous women attending antenatal clinics at 26–28 weeks of gestation were screened using a predictive index for PND. Women identified as being at high risk of developing PND were entered into an RCT of a preventive intervention for PND delivered by trained health visitors. Economic data of women in the trial and in the observational study were pooled. An independent researcher assessed the mental state of all women at 8 weeks, 18 weeks, 12 months and 18 months post-partum using the</p> | <p><b>Sample size:</b> 206</p> <p><b>Participants:</b> Primiparous women at high risk of developing PND</p> <p><b>Setting:</b> antenatal clinics</p> <p><b>Dates of data collection:</b> May 1997 to April 1999</p> | <p><b>Primary Findings:</b><br/>Mean mother-infant dyad costs were estimated at £2,419.00 for women with PND and £2026.90 for women without PND, a mean cost difference of £392.10 (<math>P=0.17</math>). The mean cost differences between women with and without PND reached statistical significance for community care services (<math>P=0.01</math>), but not for other categories of service. Economic costs were higher for women with extended experiences of the condition.</p>                                                                                                                                                                                                                                                                                                                                                                                        | <p>Aimed to estimate the economic costs of PND in a geographically defined cohort of women at high risk of developing the condition.</p> |

|                                                                   |                                                                                                                                                                                                                                                                                                                                                                                                                                                                          |                                                                                                                                                                                                                                                                                                                                           |                                                                                                                                                                                                                                                                                                                                                                                                                                                                                                                                                                                                                                                                                                                                                                                                                                                                                                                                                                                                                                                                                                                                                                                       |                                                                                                                                                                                                                                                                                                                                                                                |
|-------------------------------------------------------------------|--------------------------------------------------------------------------------------------------------------------------------------------------------------------------------------------------------------------------------------------------------------------------------------------------------------------------------------------------------------------------------------------------------------------------------------------------------------------------|-------------------------------------------------------------------------------------------------------------------------------------------------------------------------------------------------------------------------------------------------------------------------------------------------------------------------------------------|---------------------------------------------------------------------------------------------------------------------------------------------------------------------------------------------------------------------------------------------------------------------------------------------------------------------------------------------------------------------------------------------------------------------------------------------------------------------------------------------------------------------------------------------------------------------------------------------------------------------------------------------------------------------------------------------------------------------------------------------------------------------------------------------------------------------------------------------------------------------------------------------------------------------------------------------------------------------------------------------------------------------------------------------------------------------------------------------------------------------------------------------------------------------------------------|--------------------------------------------------------------------------------------------------------------------------------------------------------------------------------------------------------------------------------------------------------------------------------------------------------------------------------------------------------------------------------|
|                                                                   | Structured Clinical Interview for DSM–III–R diagnoses (SCID–II).                                                                                                                                                                                                                                                                                                                                                                                                         |                                                                                                                                                                                                                                                                                                                                           |                                                                                                                                                                                                                                                                                                                                                                                                                                                                                                                                                                                                                                                                                                                                                                                                                                                                                                                                                                                                                                                                                                                                                                                       |                                                                                                                                                                                                                                                                                                                                                                                |
| Petrou et al (2006)<br><br>(Petrou et al., 2006)<br><br><b>UK</b> | <p><b>Study Design</b> A prospective economic evaluation was conducted alongside a pragmatic RCT</p> <p><b>Type of intervention [exposure]:</b> psychosocial and psychological interventions including counselling for the prevention of PND.</p> <p><b>Data collection methods:</b> Data on health and social care use by women and their infants up to 18 months postpartum were collected, using a combination of prospective diaries and face-to-face interviews</p> | <p><b>Sample size:</b> 151 women</p> <p><b>Participants:</b> Women considered at high risk of developing PND were allocated randomly to the preventive intervention (<math>n = 74</math>) or to routine primary care (<math>n = 77</math>)</p> <p><b>Setting:</b> Health care setting.</p> <p><b>Dates of data collection:</b> c.2000</p> | <p><b>Primary Findings:</b></p> <ul style="list-style-type: none"> <li>Women in the preventive intervention group were depressed for an average of 2.21 months (9.57 weeks) during the study period, whereas women in the routine primary care group were depressed for an average of 2.70 months (11.71 weeks).</li> <li>The mean health and social care costs were estimated at £2,396.9 per mother–infant dyad in the preventive intervention group and £2,277.5 per mother–infant dyad in the routine primary care group, providing a mean cost difference of £119.5 (bootstrap 95 percent confidence interval [CI], –535.4, 784.9).</li> <li>At a willingness to pay threshold of £1,000 per month of PND avoided, the probability that the preventive intervention is cost-effective is .71 and the mean net benefit is £383.4 (bootstrap 95 percent CI, –£863.3–£1,581.5).</li> </ul> <p><b>Additional Findings:</b><br/>The preventive intervention is likely to be cost-effective even at relatively low willingness to pay thresholds for preventing 1 month of PND during the first 18 months postpartum. Given the negative impact of PND on later child development.</p> | This cost-effectiveness analysis found that given the negative impact of PND on later child development, preventive interventions are likely to be cost-effective even at relatively low willingness to pay thresholds for preventing one month of PND during the first 18 months postpartum.                                                                                  |
| Roberts et al (2001) [41]<br><br><b>Canada</b>                    | <p><b>Study design:</b> Cross-sectional economic evaluation</p> <p><b>Data collection methods:</b> EPDS and the Health and Social Service Utilization Questionnaire (HSUQ)</p>                                                                                                                                                                                                                                                                                           | <p><b>Sample size:</b> 1,250</p> <p><b>Participants:</b> mothers of infants.</p> <p><b>Setting:</b> Canadian healthcare setting</p> <p><b>Dates of data collection:</b> 1999</p>                                                                                                                                                          | <p><b>Primary findings:</b><br/>Costs were notably different for mothers with and without depression as determined by the EPDS (score of &gt; 12). The total cost for health and social care \$845 for mothers with depression and their infant's vs \$413 for those with lower scores. This was statistically significant difference at the (<math>p &lt; .01</math>).</p> <p><b>Additional findings:</b><br/>Costs for social work visits were higher for mothers with depression and mothers with low incomes.</p>                                                                                                                                                                                                                                                                                                                                                                                                                                                                                                                                                                                                                                                                 | A cross-sectional study of 1250 mothers of infants in a Canadian setting used the EPDS to investigate the costs associated with perinatal depression. It was found that costs were notably different for mothers with and without depression. The total cost for health and social care was \$845 for mothers with depression and their infant's vs \$413 for those with lower |

1  
2  
3  
4  
5  
6  
7  
8  
9  
10  
11  
12  
13  
14  
15  
16  
17  
18  
19  
20  
21  
22  
23  
24  
25  
26  
27  
28  
29  
30  
31  
32  
33  
34  
35  
36  
37  
38  
39  
40  
41  
42  
43  
44  
45  
46

|                                                               |                                                                                                                                                                                                                                                      |                                                                                                                                                                                                                                                                                                                                                                                                          |                                                                                                                                                                                                                                                                                                                                                                                                                                                                                                                                                                                                                                                                                                                                                                                                                                               |                                                                                                                                                                                                                  |
|---------------------------------------------------------------|------------------------------------------------------------------------------------------------------------------------------------------------------------------------------------------------------------------------------------------------------|----------------------------------------------------------------------------------------------------------------------------------------------------------------------------------------------------------------------------------------------------------------------------------------------------------------------------------------------------------------------------------------------------------|-----------------------------------------------------------------------------------------------------------------------------------------------------------------------------------------------------------------------------------------------------------------------------------------------------------------------------------------------------------------------------------------------------------------------------------------------------------------------------------------------------------------------------------------------------------------------------------------------------------------------------------------------------------------------------------------------------------------------------------------------------------------------------------------------------------------------------------------------|------------------------------------------------------------------------------------------------------------------------------------------------------------------------------------------------------------------|
|                                                               |                                                                                                                                                                                                                                                      |                                                                                                                                                                                                                                                                                                                                                                                                          | Total health and social care costs were double for mothers with family income below \$20,000 (\$788 v \$399) and for mothers with clinical depression (\$845 v \$413). Nursing care costs were greater for mothers with high depression scores (\$135 v \$81).                                                                                                                                                                                                                                                                                                                                                                                                                                                                                                                                                                                | depression scores. This was statistically significant different at p < .01.                                                                                                                                      |
| Stevenson et al (2010)<br>(Stevenson et al., 2010)<br><br>UK  | <b>Study Design:</b> cost-effectiveness analysis to assess group-CBT (gCBT) in comparison with routine primary care for women with PND in the UK.<br><br><b>Type of intervention [exposure]:</b> Group-CBT<br><br><b>Data collection methods:</b> SR | <b>Sample size:</b> 401<br><br><b>Participants:</b> Data were analysed from 401 women with an EPDS score of 12 or greater at 6 weeks after childbirth, which had completed both the EPDS and the SF-6D questionnaire at both 6 weeks and 6 months<br><br><b>Setting:</b> Postnatal healthcare setting in the UK<br><br><b>Dates of data collection:</b> Pre July 2009 (when PONDER study was published). | <b>Primary Findings:</b><br>The mean cost per QALY from the stochastic analysis was estimated to be £36,062; however, there was considerable uncertainty around this value. The EVPI was estimated to be greater than £64 million; the key uncertainties were in the cost per woman of providing treatment and in the statistical relationship between changes in EPDS values and changes in SF-6D values. The expected value of perfect partial information for both of these parameters was in excess of £25 million.<br><br><b>Additional Findings:</b><br>The use of gCBT does not appear to be cost-effective; however, this decision is uncertain. The value of information analyses conducted indicates that further research to provide robust information on key parameters is needed and appears justified in cost-effective terms. | This economic evaluation found that gCBT does not appear to be cost-effective due to the lack of literature providing robust information. Only one study, an RCT, was deemed applicable to the decision problem. |
| Wilkinson et al (2017)<br>(Wilkinson et al., 2017)<br><br>USA | <b>Study Design:</b> Modelling study<br><br><b>Type of intervention [exposure]:</b> N/A<br><br><b>Data collection methods:</b> Hypothetical cohort                                                                                                   | <b>Sample size:</b> 1,000<br><br><b>Participants:</b> follows a hypothetical cohort of 1000 pregnant women experiencing one live birth over a 2-year time horizon.<br><br><b>Setting:</b> USA healthcare setting.<br><br><b>Dates of data collection:</b> data were obtained from literature published between 1995 and 2015.                                                                            | <b>Primary Findings:</b><br><ul style="list-style-type: none"> <li>Screening for and treating postpartum depression and psychosis produced 29 more healthy women at a cost of \$943 per woman.</li> <li>The incremental cost-effectiveness ratios of the intervention branch compared to usual care were \$13,857 per QALY gained (below the commonly accepted willingness to pay threshold of \$50,000/QALY gained) and \$10,182 per remission achieved.</li> <li>These results were robust in both the deterministic and probabilistic sensitivity analyses of input parameters.</li> </ul> <b>Additional Findings:</b>                                                                                                                                                                                                                     | This economic modelling study modelled the cost-effectiveness of physicians screening for and treating postpartum depression and psychosis in partnership with a psychiatrist.                                   |

|  |  |  |                                                                                                                                                                                                                                                   |
|--|--|--|---------------------------------------------------------------------------------------------------------------------------------------------------------------------------------------------------------------------------------------------------|
|  |  |  | Screening for and treating postpartum depression is a cost-effective intervention and should be considered as part of usual postnatal care, which aligns with the recently proposed recommendations from the U.S. Preventive Services Task Force. |
|--|--|--|---------------------------------------------------------------------------------------------------------------------------------------------------------------------------------------------------------------------------------------------------|

Table 6: Data extraction table for Randomised Controlled Trials on maternal depression

| Citation (Country)                                      | Study Details                                                                                                                                                                                                                                                                                                                                                                                                                                                                                            | Participants and setting                                                                                                                                                                                                                                                                                                                                        | Key findings                                                                                                                                                                                                                                                                                                                                                                                                                                                                                                                                                                                                                                                                                                                                                    | Observations                                                                                                                                                                                                                                                                                                                                                                                                                                                                                                                                                                                                                                                                                                                                                                                                                                                                                                                                                        |
|---------------------------------------------------------|----------------------------------------------------------------------------------------------------------------------------------------------------------------------------------------------------------------------------------------------------------------------------------------------------------------------------------------------------------------------------------------------------------------------------------------------------------------------------------------------------------|-----------------------------------------------------------------------------------------------------------------------------------------------------------------------------------------------------------------------------------------------------------------------------------------------------------------------------------------------------------------|-----------------------------------------------------------------------------------------------------------------------------------------------------------------------------------------------------------------------------------------------------------------------------------------------------------------------------------------------------------------------------------------------------------------------------------------------------------------------------------------------------------------------------------------------------------------------------------------------------------------------------------------------------------------------------------------------------------------------------------------------------------------|---------------------------------------------------------------------------------------------------------------------------------------------------------------------------------------------------------------------------------------------------------------------------------------------------------------------------------------------------------------------------------------------------------------------------------------------------------------------------------------------------------------------------------------------------------------------------------------------------------------------------------------------------------------------------------------------------------------------------------------------------------------------------------------------------------------------------------------------------------------------------------------------------------------------------------------------------------------------|
| Grote et al (2017)<br><br>Grote et al., 2017<br><br>USA | <p><b>Study Design:</b> RCT with blinded assessment</p> <p><b>Type of intervention [exposure]:</b> 18 months MOMCare collaborative care depression intervention (choice of brief interpersonal psychotherapy or pharmacotherapy or both) with enhanced maternity support services (MSS-Plus).</p> <p><b>Data collection methods:</b> Blinded telephone assessments, including depression severity on SCL-20. Unit costs of MOMCare intervention actual salary rate + fringe benefits + 30% overheads</p> | <p><b>Sample size:</b> 152</p> <p><b>Participants:</b> 152 pregnant women 12-32 wks gestation with probable major depression or dysthymia (PTSD). Plus 12 excluded from analysis due to missing final data.</p> <p><b>Setting:</b> 10 county public health centres</p> <p><b>Dates of data collection:</b> Recruited Jan 2010 – July 2012. Study ended 2014</p> | <p><b>Primary Findings:</b> when controlled for baseline depression severity, women with probable depression and PTSD in MOMCare had 68 more depression-free days over 18 months than those in MSS-Plus (p,.05). Additional \$1,312. depression care cost per MOMCare participant with comorbid PTSD. Incremental net benefit of MOMCare was positive if a depression free days was valued at ≥ \$20</p> <p><b>Additional Findings:</b><br/>Unit costs used 2013:<br/>\$80 per 45-50 min depression care specialist (DCS) visit<br/>\$31 per 20-30 min DCS phone call (Both included time for outreach efforts and record keeping)<br/>\$247 fixed cost per patient for caseload supervision and info support<br/>Other references to US-based data sources</p> | <p>In this RCT a multicomponent collaborative care intervention for depression (MOMcare - a choice of brief interpersonal psychotherapy or pharmacotherapy or both) with enhanced maternity support services (MSS-Plus) in the public health system of Seattle, USA. The incremental benefit and cost and the net benefit for women with major depression and PTSD was estimated. When controlled for baseline depression severity, women with probable depression and PTSD in MOMCare had 68 more depression-free days over 18 months than those in MSS-Plus (p&lt;.05). There was an additional £1,943** depression care cost per MOMCare participant with comorbid PTSD. The incremental net benefit of MOMCare was positive if depression free days was valued below £18**. For women with probable major depression and PTSD, MOMCare had a significant clinical benefit over MSS-Plus, with only a moderate increase in health services cost.<sup>1</sup></p> |
| Henderson et al (2019)                                  | <p><b>Study Design:</b> PONDER Cluster RCT</p>                                                                                                                                                                                                                                                                                                                                                                                                                                                           | <p><b>Sample size:</b> From 101 GP practices, 4,084 participants consented, baseline data from 3,449 participants.</p>                                                                                                                                                                                                                                          | <p><b>Primary Findings:</b> 99% probability of cost effectiveness at £20,000 at 6 months postnatal</p>                                                                                                                                                                                                                                                                                                                                                                                                                                                                                                                                                                                                                                                          | <p>This study found that CBT had a marginally higher probability of being cost-effective than a person-centred approach.</p>                                                                                                                                                                                                                                                                                                                                                                                                                                                                                                                                                                                                                                                                                                                                                                                                                                        |

1 \*\* Prices have been inflated and converted to GBP [52].

|                                                  |                                                                                                                                                                                                                                                                                                                                                                                                                                                              |                                                                                                                                                                                                                                                         |                                                                                                                                                                                                                               |  |
|--------------------------------------------------|--------------------------------------------------------------------------------------------------------------------------------------------------------------------------------------------------------------------------------------------------------------------------------------------------------------------------------------------------------------------------------------------------------------------------------------------------------------|---------------------------------------------------------------------------------------------------------------------------------------------------------------------------------------------------------------------------------------------------------|-------------------------------------------------------------------------------------------------------------------------------------------------------------------------------------------------------------------------------|--|
| <p>(Henderson et al., 2019)</p> <p><b>UK</b></p> | <p><b>Type of intervention [exposure]:</b> GP practices assigned to usual health visitor (HV) care, HV trained to assess for PND plus offering either a CBA or a person-centred approach (PCA) weekly for 8 weeks</p> <p><b>Data collection methods:</b> Postal questionnaires: Baseline incl EPDS and SF36 at 6 weeks, Postnatal questionnaires at 6, 12 and 18 months postnatal. Resource use logs were completed by HVs based on their and GP records</p> | <p><b>Participants:</b> 2,241 lower risk women completed EPDS at 6 months – 767 control, 1,474 intervention. 1,459 women provided economic data.</p> <p><b>Setting:</b> GP practices</p> <p><b>Dates of data collection:</b> April 2003 for 3 years</p> | <p>Compared with controls, adjusted 6 months costs were £82 lower with the interventions</p> <p><b>Additional Findings:</b><br/>Little difference CBA to PCA – CBA marginally higher probability of being cost effective.</p> |  |
|--------------------------------------------------|--------------------------------------------------------------------------------------------------------------------------------------------------------------------------------------------------------------------------------------------------------------------------------------------------------------------------------------------------------------------------------------------------------------------------------------------------------------|---------------------------------------------------------------------------------------------------------------------------------------------------------------------------------------------------------------------------------------------------------|-------------------------------------------------------------------------------------------------------------------------------------------------------------------------------------------------------------------------------|--|

Table 7: Data extraction table for Systematic Reviews on maternal depression

| Citation (Country)                                      | Study Details                                                                                                                                                                                                         | Participants and setting                                                                                                                                                                                    | Key findings                                                                                                                                                                                                                                                                                                                                                                                                                                                                                                                                                                                                                                                                                                                                                         | Observations                                                                                                                                                                                                                                                         |
|---------------------------------------------------------|-----------------------------------------------------------------------------------------------------------------------------------------------------------------------------------------------------------------------|-------------------------------------------------------------------------------------------------------------------------------------------------------------------------------------------------------------|----------------------------------------------------------------------------------------------------------------------------------------------------------------------------------------------------------------------------------------------------------------------------------------------------------------------------------------------------------------------------------------------------------------------------------------------------------------------------------------------------------------------------------------------------------------------------------------------------------------------------------------------------------------------------------------------------------------------------------------------------------------------|----------------------------------------------------------------------------------------------------------------------------------------------------------------------------------------------------------------------------------------------------------------------|
| <p>Gurung et al (2018)</p> <p>[37]</p> <p><b>UK</b></p> | <p><b>Study Design:</b> SR of economic evaluations</p> <p><b>Type of intervention [exposure]:</b> PND</p> <p><b>Data collection methods:</b> Search strategy across eight electronic databases and other sources.</p> | <p><b>Sample size:</b> 17 economic evaluations met the criteria for this SR.</p> <p><b>Setting:</b> UK maternal healthcare setting.</p> <p><b>Dates of data collection:</b> papers found from 2000-2015</p> | <p><b>Primary Findings:</b></p> <ul style="list-style-type: none"> <li>• Three studies found that a combination of PND screening and treatment was cost-effective.</li> <li>• Three studies reported that treatments such as psychological therapy, facilitated self-help and customized treatment were more cost-effective than standard care</li> <li>• Four studies found positive results for preventive strategies which involved peer support or counselling and other specific support</li> <li>• Group CBT was not found to be cost-effective compared to standard care in one study.</li> </ul> <p><b>Additional Findings:</b> Study aimed to identify interventions to prevent or treat PND for which an economic evaluation had been conducted and to</p> | <p>This SR found positive results for preventive strategies which involved peer support or counselling and other specific support. However, group cognitive behavioural therapy (CBT) was not found to be cost-effective compared to standard care in one study.</p> |

|                                                              |                                                                                                                                                                                                                                                                                                                                                                                                                                                                                                                                                               |                                                                                                                                                                                                                                                                                          |                                                                                                                                                                                                                                                                                                                                                                                                                                                                                                                                                                                                                                                                                                                                                                                                                                                                                                                                                                                                                                                                                                                                            |                                                                                                                                                                                                                                                                                                                                                                                                                           |
|--------------------------------------------------------------|---------------------------------------------------------------------------------------------------------------------------------------------------------------------------------------------------------------------------------------------------------------------------------------------------------------------------------------------------------------------------------------------------------------------------------------------------------------------------------------------------------------------------------------------------------------|------------------------------------------------------------------------------------------------------------------------------------------------------------------------------------------------------------------------------------------------------------------------------------------|--------------------------------------------------------------------------------------------------------------------------------------------------------------------------------------------------------------------------------------------------------------------------------------------------------------------------------------------------------------------------------------------------------------------------------------------------------------------------------------------------------------------------------------------------------------------------------------------------------------------------------------------------------------------------------------------------------------------------------------------------------------------------------------------------------------------------------------------------------------------------------------------------------------------------------------------------------------------------------------------------------------------------------------------------------------------------------------------------------------------------------------------|---------------------------------------------------------------------------------------------------------------------------------------------------------------------------------------------------------------------------------------------------------------------------------------------------------------------------------------------------------------------------------------------------------------------------|
|                                                              |                                                                                                                                                                                                                                                                                                                                                                                                                                                                                                                                                               |                                                                                                                                                                                                                                                                                          | evaluate the health and non-health outcomes included.                                                                                                                                                                                                                                                                                                                                                                                                                                                                                                                                                                                                                                                                                                                                                                                                                                                                                                                                                                                                                                                                                      |                                                                                                                                                                                                                                                                                                                                                                                                                           |
| Morrell et al (2016)<br><br>(Morrell et al., 2016)<br><br>UK | <p><b>Study Design:</b> SR, evidence synthesis and meta-analysis.</p> <p><b>Type of intervention [exposure]:</b> person-centred approach (PCA)-based and CBT, interpersonal psychotherapy (IPT) and education on preparing for parenting, promoting parent–infant interaction, peer support, the involvement of partners and access to several visits from a midwife or health visitor trained in person-centred or cognitive–behavioural approaches.</p> <p><b>Data collection methods:</b> MEDLINE, EMBASE, Science Citation Index and other databases.</p> | <p><b>Sample size:</b> 122 studies met the inclusion criteria for this SR</p> <p><b>Participants:</b> postnatal women, their infants, and their families.</p> <p><b>Setting:</b> UK maternal healthcare setting.</p> <p><b>Dates of data collection:</b> December 2012 to July 2013.</p> | <p><b>Primary Findings:</b></p> <ul style="list-style-type: none"> <li>The most beneficial interventions appeared to be midwifery redesigned postnatal care [as shown by the mean 12-month EPDS score difference of -1.43 (95% credible interval - 4.00 to 1.36)], person-centred approach (PCA)-based and cognitive-behavioural therapy (CBT) interpersonal psychotherapy (IPT) and education on preparing for parenting, promoting parent-infant interaction, peer support, IPT and PCA and CBT.</li> <li>Women valued seeing the same health worker, the involvement of partners and access to several visits from a midwife or health visitor trained in person-centred or cognitive-behavioural approaches.</li> <li>The most cost-effective interventions were estimated to be midwifery redesigned postnatal care, PCA and IPT-based intervention.</li> <li>Expected value of partial perfect information (EVPPi) for efficacy data was in excess of £150M for each population. Given the EVPPi values, future trials assessing the relative efficacies of promising interventions appears to represent value for money.</li> </ul> | <p>This SR with meta-analysis found that the most beneficial and cost-effective interventions appeared to be midwifery redesigned postnatal care, person-centred approach (PCA) and interpersonal psychotherapy (IPT). Women valued seeing the same health worker, partners' involvement, and access to several visits from a midwife or health visitor trained in person-centred or cognitive-behavioural approaches</p> |

Table 8: Data extraction table for studies including maternal health and wellbeing

| Citation (Country) | Study Details | Participants and setting | Key findings | Observations |
|--------------------|---------------|--------------------------|--------------|--------------|
|--------------------|---------------|--------------------------|--------------|--------------|

1  
2  
3  
4  
5  
6  
7  
8  
9  
10  
11  
12  
13  
14  
15  
16  
17  
18  
19  
20  
21  
22  
23  
24  
25  
26  
27  
28  
29  
30  
31  
32  
33  
34  
35  
36  
37  
38  
39  
40  
41  
42  
43  
44  
45  
46

|                                                                        |                                                                                                                                                                                                                                                                                                                                                                                                                                                                             |                                                                                                                                                                                                                                                                                    |                                                                                                                                                                                                                                                                                                                                                                                                                                                                                                                                                                                                                                                                                                                                                                                                                                                                                                                                                                                                                                                                                                                                                                                                                                                                                                                                                                                             |                                                                                                                                                                                                                                                                                                   |
|------------------------------------------------------------------------|-----------------------------------------------------------------------------------------------------------------------------------------------------------------------------------------------------------------------------------------------------------------------------------------------------------------------------------------------------------------------------------------------------------------------------------------------------------------------------|------------------------------------------------------------------------------------------------------------------------------------------------------------------------------------------------------------------------------------------------------------------------------------|---------------------------------------------------------------------------------------------------------------------------------------------------------------------------------------------------------------------------------------------------------------------------------------------------------------------------------------------------------------------------------------------------------------------------------------------------------------------------------------------------------------------------------------------------------------------------------------------------------------------------------------------------------------------------------------------------------------------------------------------------------------------------------------------------------------------------------------------------------------------------------------------------------------------------------------------------------------------------------------------------------------------------------------------------------------------------------------------------------------------------------------------------------------------------------------------------------------------------------------------------------------------------------------------------------------------------------------------------------------------------------------------|---------------------------------------------------------------------------------------------------------------------------------------------------------------------------------------------------------------------------------------------------------------------------------------------------|
| <p>Chojenta et al (2019)<br/>(Chojenta et al., 2019)<br/>Australia</p> | <p><b>Study design:</b> Cross- sectional<br/><b>Data collection methods:</b> Health economics modelling study.<br/>Data were taken from the Australian Longitudinal Study on Women’s Health (ALSWH), an ongoing population-based study of health and well-being.</p>                                                                                                                                                                                                        | <p><b>Sample size:</b>12,689<br/><b>Participants:</b> Three cohorts of women born 1973–78, 1946–1951 and 1921–1926, with a fourth cohort born in 1989–1995 added in 2012.<br/><b>Setting:</b> Australian healthcare setting.<br/><b>Dates of data collection:</b> 1921 to 1995</p> | <p><b>Primary findings:</b><br/>The healthcare costs for postnatal women who had poor mental health prior to birth was \$1,792 (AUD). This is on average 11% more than for mothers with no previous history of poor mental health.</p>                                                                                                                                                                                                                                                                                                                                                                                                                                                                                                                                                                                                                                                                                                                                                                                                                                                                                                                                                                                                                                                                                                                                                      | <p>This modelling study from Australia, utilising cohort data from 1921 to 1995 found that the healthcare costs for postnatal women who had poor mental health prior to birth was \$1,792 (AUD). This is on average 11% more than for mothers with no previous history of poor mental health.</p> |
| <p>Moran et al (2020)<br/>(Moran et al., 2020)<br/>Ireland</p>         | <p><b>Study Design:</b> SR<br/><b>Type of intervention [exposure]:</b> SR with the aim to estimate the economic burden of common health problems associated with pregnancy and childbirth, such as incontinence, mental health problems, or gestational diabetes, excluding acute complications of labour or birth, or severe acute adverse maternal outcomes.<br/><b>Data collection methods:</b> Searches of Medline, Embase, CINAHL, PsycINFO and EconLit databases.</p> | <p><b>Sample size:</b> 38 studies met the inclusion criteria for this SR.<br/><b>Participants:</b> pregnant women and women who have given birth<br/><b>Setting:</b> Irish healthcare setting.<br/><b>Dates of data collection:</b> Up to November 2019</p>                        | <p><b>Primary Findings:</b><br/>Thirty-eight relevant studies were identified, some of which reported incremental costs for more than one health problem (16 gestational diabetes, 13 overweight/obesity, 8 mental health, 4 hypertensive disorders, 2 nausea and vomiting, 2 epilepsy, 1 intimate partner violence). A high level of heterogeneity was observed in both the methods used, and the incremental cost estimates obtained for each morbidity. Average incremental costs tended to be higher in studies that modelled a hypothetical cohort of women using data from a range of sources (compared to analyses of primary data), and in studies set in the United States. No studies that examined the economic burden of some common pregnancy-related morbidities, such as incontinence, pelvic girdle pain, or sexual health problems, were identified.<br/><b>Additional Findings:</b><br/>Our findings indicate that maternal morbidity is associated with significant costs to health systems and society, but large gaps remain in the evidence base for the economic burden of some common health problems associated with pregnancy and childbirth. More research is needed to examine the economic burden of a range of common maternal health problems, and future research should adopt consistent methodological approaches to ensure comparability of results.</p> | <p>In this SR, among the four included studies that examined costs during pregnancy, birth, or the immediate post-partum period, the estimated incremental costs of poor maternal mental health ranged from £422 to £742.</p>                                                                     |
| <p>Morrell et al (2000)</p>                                            | <p><b>Study Design:</b> RCT</p>                                                                                                                                                                                                                                                                                                                                                                                                                                             | <p><b>Sample size:</b> 623</p>                                                                                                                                                                                                                                                     | <p><b>Primary Findings:</b> 551 completed 6 weeks questionnaire, 493 at 6 months.</p>                                                                                                                                                                                                                                                                                                                                                                                                                                                                                                                                                                                                                                                                                                                                                                                                                                                                                                                                                                                                                                                                                                                                                                                                                                                                                                       | <p>This study found that there were no savings to the NHS</p>                                                                                                                                                                                                                                     |

|                                            |                                                                                                                                                                                                                                                                                                                                                                                                                                                                     |                                                                                                                                                                                                                                                                                                                                                                                                                                                                                                                                                                                                                                                                                                                                             |                                                                                                                                                                                                                                                                                                                                                                                                                                                                                                                                                                                                                                  |                                                                                                                                                                                                                                                                                                                                                                                                             |
|--------------------------------------------|---------------------------------------------------------------------------------------------------------------------------------------------------------------------------------------------------------------------------------------------------------------------------------------------------------------------------------------------------------------------------------------------------------------------------------------------------------------------|---------------------------------------------------------------------------------------------------------------------------------------------------------------------------------------------------------------------------------------------------------------------------------------------------------------------------------------------------------------------------------------------------------------------------------------------------------------------------------------------------------------------------------------------------------------------------------------------------------------------------------------------------------------------------------------------------------------------------------------------|----------------------------------------------------------------------------------------------------------------------------------------------------------------------------------------------------------------------------------------------------------------------------------------------------------------------------------------------------------------------------------------------------------------------------------------------------------------------------------------------------------------------------------------------------------------------------------------------------------------------------------|-------------------------------------------------------------------------------------------------------------------------------------------------------------------------------------------------------------------------------------------------------------------------------------------------------------------------------------------------------------------------------------------------------------|
| <p>[44]<br/>UK</p>                         | <p><b>Type of intervention [exposure]:</b><br/>Up to 10 home visits in the first postnatal month of up to three hours duration by a community postnatal support worker.</p> <p>Impact of community postnatal support worker in addition to usual community midwife care on rest and recovery, health status, satisfaction with services and NHS Resource use and costs.</p> <p><b>Data collection methods:</b> Postal questionnaires (including SF36 and EPDS).</p> | <p><b>Participants:</b> Postnatal women delivering at a university hospital</p> <p><b>Setting:</b> Home and community</p> <p><b>Dates of data collection:</b> Recruitment on labour wards from October 1996 to November 1997</p>                                                                                                                                                                                                                                                                                                                                                                                                                                                                                                            | <p>No evidence of use of fewer NHS services by women using the support worker versus controls at 6 weeks or 6 months.</p> <p>Additional costs per woman at 6 weeks of £179.58 mostly due to support worker training (<math>p &lt; 0.001</math>).</p> <p><b>Additional Findings:</b> No diff primary outcome at 6 weeks but <math>p &lt; 0.05</math> for physical and social functioning and <math>p = 0.005</math> EPDS for controls. No difference in SF36 health status scores, EPDS scale or Duke Functional Social Support scale, rate of breastfeeding).</p>                                                                | <p>over six months after the introduction of a community support worker service and no improvement to the health status among the women in the intervention group, which was measured by an SF-36 questionnaire. At six weeks, the mean total NHS costs were £975<sup>□</sup> for the intervention group and £700 for the control group. At six months, the figures were £1,250 and £980, respectively.</p> |
| <p>Ride (2018)<br/>(Ride, 2018)<br/>UK</p> | <p><b>Study Design:</b> Modelling study (health economics)</p> <p><b>Data collection methods:</b> Decision analytic modelling</p>                                                                                                                                                                                                                                                                                                                                   | <p><b>Date of model:</b> 2018</p> <p>The models were developed using TreeAge Pro 2015 software (TreeAge Software, Inc., Williamstown, MA, USA). The population of interest was postnatal women and their children in the United Kingdom, because much of the data came from that setting; this gave an explicit societal threshold of £20,000 to £30,000 per QALY for cost-effectiveness analysis in health care. A health sector perspective was taken, except for the children's model, which expanded to a public sector perspective to accommodate educational costs. A discount rate of 3.5% was applied to costs and QALYs, with discounting applied back to the child's birth. All costs were converted to 2014 pounds sterling.</p> | <p><b>Primary Findings:</b> The results suggest that broader boundaries, particularly extension of the time horizon, could make substantial differences to estimated cost-effectiveness. Inclusion of family effects without extension of the time horizon had little impact, but where a longer time horizon was used, family effects could make a significant difference to the conclusions drawn from cost-effectiveness analysis</p> <p><b>Additional Findings:</b><br/>The authors note that it is important not only to consider caregiving but also family health effects in the outcomes of maternal health studies.</p> | <p>By ignoring broader sets of costs and outcomes, resources in postnatal mental health may be misallocated, and as a result, some women may not benefit as much from interventions that might be cost-effective given a broader time-horizon.</p>                                                                                                                                                          |



1  
2  
3  
4  
5  
6  
7  
8  
9  
10  
11  
12  
13  
14  
15  
16  
17  
18  
19  
20  
21  
22  
23  
24  
25  
26  
27  
28  
29  
30  
31  
32  
33  
34  
35  
36  
37  
38  
39  
40  
41  
42  
43  
44  
45  
46

For peer review only

## Search strategy

Below is an example of a search strategy for the Medline database.

| ID | Search terms                                                                                                                                              |
|----|-----------------------------------------------------------------------------------------------------------------------------------------------------------|
| 1  | exp Pregnancy/                                                                                                                                            |
| 2  | (pregnan* or childbearing).ti,ab,kw.                                                                                                                      |
| 3  | (postpartum or post-partum or postnatal or postnatal or perinatal or peri-natal or prenatal or pre-natal or antenatal or ante-natal or matern*).ti,ab,kw. |
| 4  | perinatal anxiety.ti,ab,kw. or exp Perinatal anxiety/                                                                                                     |
| 5  | exp Depression/                                                                                                                                           |
| 6  | depress\$.ti,ab,kw.                                                                                                                                       |
| 7  | 5 or 6                                                                                                                                                    |
| 8  | (Infant or baby or child).ti,ab,kw                                                                                                                        |
| 9  | (care* or treatment).tiab.kw                                                                                                                              |
| 10 | NHS.ti,ab,kw                                                                                                                                              |
| 11 | hospitali\$ation*.ti,ab,kw                                                                                                                                |
| 12 | exp Resource allocation/                                                                                                                                  |
| 13 | economic evaluation\$.ti,ab,kw.                                                                                                                           |
| 14 | (cost* or economic* or pharmacoeconomic*).ti.                                                                                                             |
| 15 | 13 or 14                                                                                                                                                  |
| 16 | exp "costs and cost analysis"/ or exp Health Care Costs/                                                                                                  |
| 17 | exp Cost-Benefit Analysis/                                                                                                                                |
| 18 | (cost* adj2 (effective* or utility* or benefit* or consequence* or minimi*)).ti,ab,kw.                                                                    |
| 19 | 16 or 17 or 18                                                                                                                                            |
| 20 | quality-adjusted life year\$.ti,ab,kw. or exp Quality-Adjusted Life Years/                                                                                |
| 21 | Or 7 and 15 and 19                                                                                                                                        |

## Abbreviations

| Abbreviation | Full                                         | Aspect       |
|--------------|----------------------------------------------|--------------|
| ANOVA        | Analysis of Variance                         | Analysis     |
| ANRQ-R       | Antenatal Risk Questionnaire                 | Tool         |
| CATi         | Computer Assisted Telephone Interviews       | Research     |
| CBA          | Cognitive Behavioural Approach               | Intervention |
| CBT          | Cognitive Behavioural Therapy                | Intervention |
| CEA          | Cost Effectiveness Analysis                  | Analysis     |
| CIDI         | Composite International Diagnostic Interview | Research     |
| CUA          | Cost Utility Analysis                        | Analysis     |
| DASS21       | Depression, Anxiety and Stress Scale         | Tool         |

|                     |                                                                      |                   |
|---------------------|----------------------------------------------------------------------|-------------------|
| DCS                 | Depression Care Specialist                                           | Staff             |
| DFD                 | Disease Free Day                                                     | Research          |
| DSM-IV              | Diagnostic and Statistical Manual for Mental Disorders 4th Edition   | Source            |
| eMBI                | electronic Mindfulness-based Intervention                            | Intervention      |
| EPDS                | Edinburgh Postnatal Depression Scale                                 | Tool              |
| ePRO                | electronic Patient Reported Outcomes                                 | Research          |
| EQ-5D-3L            | EuroQol 5 Dimension 3 Level                                          | Tool              |
| GP                  | General Practitioner                                                 | Staff             |
| gCBT                | Group cognitive behavioural therapy                                  | Intervention      |
| HRU                 | Healthcare resource utilization                                      | Analysis          |
| HV                  | Health Visitor                                                       | Staff             |
| ICD                 | International Classification of Diseases                             | Source            |
| ICER                | Incremental Cost-Effectiveness Ratio                                 | Analysis          |
| IG                  | Intervention Group                                                   | Research          |
| IPT                 | Interpersonal psychotherapy                                          | Intervention      |
| ITT                 | Intention to Treat                                                   | Research          |
| LGA                 | Local Government Area                                                | Organisation      |
| MBS                 | Medical Benefits Schedule                                            | Source            |
| MCH                 | Maternal and Child Health                                            | Setting           |
| MFAS                | Maternal-Fetal Attachment Scale                                      | Tool              |
| MOMcare             |                                                                      | <i>Study name</i> |
| MINI                | Mini-International Neuropsychiatric Interview                        | Tool              |
| NHS                 | National Health Service                                              | Setting           |
| OOP                 | Out of Pocket                                                        | Research          |
| PAD                 | perinatal anxiety and/or depression                                  | Diagnosis         |
| PBS                 | Pharmaceutical Benefits Scheme                                       | Source            |
| PCA                 | Personalised Care Approach                                           | Intervention      |
| PHQ-9               | Patient Health Questionnaire                                         | Tool              |
| PND                 | Postnatal depression                                                 | Diagnosis         |
| PND                 | Post-partum depression                                               | Diagnosis         |
| <i>PoNDER trial</i> | <b>POstNatal Depression Economic evaluation and Randomised trial</b> | <i>Study name</i> |
| PRAQ-R              | Pregnancy-Related Anxiety Questionnaire                              | Tool              |
| PTSD                | Post-Traumatic Stress Disorder                                       | Diagnosis         |
| QALY                | Quality Adjusted Life Year                                           | Analysis          |
| RCT                 | Randomised controlled trial                                          | Research          |
| SCL-20              | Hopkins Symptom Checklist-20                                         | Tool              |
| SF36                | Short-Form 36                                                        | Tool              |
| SIDS                | Sudden infant death syndrome                                         | Diagnosis         |
| <i>SPARCS</i>       | <i>Sleep, Parenting and Relationships in a Community Setting</i>     | <i>Study name</i> |
| STAI                | State-Trait Anxiety Questionnaire                                    | Tool              |
| TAU                 | Treatment as Usual                                                   | Research          |
| TENS                | Transcutaneous Electrical Nerve Stimulation                          | Intervention      |
| WHO                 | World Health Organisation                                            | Organisation      |
| WWWT                | What Were We Thinking                                                | Tool              |

Quality appraisal of health economic evaluation studies (Drummond et al., 2015)

| Drummond et al checklist 2015                                                                    | Petrou et al (2002)<br>(Petrou et al., 2002) | Petrou et al (2006)<br>(Petrou et al., 2006) | Ride et al (2016)<br>(Ride et al., 2016) | Henderson et al (2019)<br>(Henderson et al., 2019) |
|--------------------------------------------------------------------------------------------------|----------------------------------------------|----------------------------------------------|------------------------------------------|----------------------------------------------------|
| 1. Was a well defined question posed in an answerable form?                                      | Yes                                          | Yes                                          | Yes                                      | Yes                                                |
| 2. Was a comprehensive description of the competing alternatives given?                          | n/a                                          | n/a                                          | Yes                                      | Yes                                                |
| 3. Was the effectiveness of the programs or services established?                                | n/a                                          | n/a                                          | Yes                                      | Yes                                                |
| 4. Were all the important and relevant costs and consequences for each alternative identified?   | n/a                                          | n/a                                          | Yes                                      | Yes                                                |
| 5. Were costs and consequences measured accurately in appropriate physical units?                | Yes                                          | Yes                                          | Yes                                      | Yes                                                |
| 6. Were costs and consequences valued credibly?                                                  | Yes                                          | Yes                                          | Yes                                      | Yes                                                |
| 7. Were costs and consequences adjusted for differential timing                                  | n/a                                          | n/a                                          | No                                       | No                                                 |
| 8. Was an incremental analysis of costs and consequences of alternatives performed?              | n/a                                          | n/a                                          | No                                       | Yes                                                |
| 9. Was allowance made for uncertainty in the estimates of costs and consequences?                | Yes                                          | Yes                                          | Yes                                      | Yes                                                |
| 10. Did the presentation and discussion of study results include all issues of concern to users? | Yes                                          | Yes                                          | Yes                                      | Yes                                                |

Source of checklist: Drummond, M. F., Sculpher, M. J., Claxton, K., Stoddart, G. L., & Torrance G W. (2015). *Methods for the economic evaluation of health care programmes* (4th ed.). Oxford: Oxford University Press.

Quality appraisal of health economic modelling studies with CHARMS  
Checklist (Moons et al., 2014)

| Domain                            | Key items                                                                                 | Counts et al (2022) - (Counts et al., 2022) | Franta et al (2022) - (Franta et al., 2022) | Ride (2018) - (Ride, 2018) | Wilkins et al (2017) - (Wilkins et al., 2017) | Bauer et al (2015) (Bauer et al, 2015) | Stevenso n et al, (2010) (Stevenso n et al., 2010) |
|-----------------------------------|-------------------------------------------------------------------------------------------|---------------------------------------------|---------------------------------------------|----------------------------|-----------------------------------------------|----------------------------------------|----------------------------------------------------|
| <b>SOURCE OF DATA</b>             | Source of data (e.g., cohort, case-control, randomized trial participants).               | p.3                                         | p.2                                         | p.575                      | p.3                                           | p.52                                   | p.581                                              |
| <b>PARTICIPANTS</b>               | Participant eligibility and recruitment method (e.g., consecutive participants, location, | p.3                                         | p.2                                         | p.575                      | p.3                                           | p.52                                   | p.581                                              |
|                                   | Participant description                                                                   | p.3                                         | p.2                                         | p.575                      | p.3                                           | p.52                                   | p.581                                              |
|                                   | Details of treatments received, if                                                        | p.5                                         | p.2                                         | p.575                      | p.3                                           | p.52                                   | N/A                                                |
|                                   | Study dates                                                                               | p.4                                         | p.2                                         | p.575                      | p.3                                           | p.52                                   | p.581                                              |
| <b>OUTCOME(S) TO BE PREDICTED</b> | Definition and method for measurement of outcome                                          | p.4                                         | p.2                                         | p.574                      | p.4                                           | p.53                                   | p.581-582                                          |
|                                   | Was the same outcome definition (and method for measurement ) used in all                 | Yes p.5                                     | p.2                                         | p.574                      | p.4                                           | p.53                                   | p.581-582                                          |
|                                   | Type of outcome (e.g., single or combined                                                 | p.3                                         | p.5                                         | p.574                      | p.4                                           | p.53                                   | p.581                                              |
|                                   | Was the outcome assessed without knowledge of                                             | No                                          | No                                          | No                         | No                                            | No                                     | p.581                                              |
|                                   | Were candidate predictors part of the outcome                                             | No                                          | No                                          | No                         | No                                            | No                                     | p.581                                              |

|                                              |                                                                                                    |         |         |         |         |         |           |
|----------------------------------------------|----------------------------------------------------------------------------------------------------|---------|---------|---------|---------|---------|-----------|
|                                              | Time of outcome occurrence or summary of duration of follow-up                                     | p.5     | p.5     | p.578   | p.4     | p.52    | p.581     |
| <b>CANDIDATE PREDICTORS (OR INDEX TESTS)</b> | Number and type of predictors (e.g., demographics, patient history, physical examination,          | p.5     | p.5     | p.577   | p.6     | p.55    | p.582     |
|                                              | Definition and method for measurement of candidate predictors                                      | p.5     | p.5     | p.575   | p.6     | p.55    | p.580-582 |
|                                              | Timing of predictor measurement (e.g., at patient presentation, at diagnosis.                      | p.5     | p.5     | p.577   | p.6     | p.55    | p.581     |
|                                              | Were predictors assessed blinded for outcome, and for each other                                   | No      | No      | No      | No      | No      | p.582     |
|                                              | Handling of predictors in the modelling (e.g., continuous, linear, non-linear transformation       | Unclear | Unclear | Unclear | Unclear | p.52    | p.582     |
| <b>SAMPLE SIZE</b>                           | Number of participants and number of outcomes/ev                                                   | p.3     | p.2     | p.575   | P.3     | p.55    | p.582     |
|                                              | Number of outcomes/ev ents in relation to the number of candidate predictors (Events Per Variable) | p.5     | p.3     | p.577   | p.20    | p.57    | p.582     |
| <b>MISSING DATA</b>                          | Number of participants with any missing value                                                      | p.4     | Unclear | Unclear | Unclear | Unclear | Unclear   |

|                          |                                                                                                                                                                                                     |                                  |                        |                         |                        |                         |                    |
|--------------------------|-----------------------------------------------------------------------------------------------------------------------------------------------------------------------------------------------------|----------------------------------|------------------------|-------------------------|------------------------|-------------------------|--------------------|
|                          | Number of participants with missing data for each predictor                                                                                                                                         | Unclear                          | Unclear                | Unclear                 | Unclear                | Unclear                 | Unclear            |
|                          | Handling of missing data (e.g., complete-case analysis, imputation, or                                                                                                                              | Unclear                          | Unclear                | Unclear                 | Unclear                | Unclear                 | Unclear            |
| <b>MODEL DEVELOPMENT</b> | Modelling method (e.g., logistic, survival, neural network, or                                                                                                                                      | Simulated cohort model           | Simulated cohort model | Decision analytic model | Simulated cohort model | Decision analytic model | Mathematical model |
|                          | Modelling assumptions satisfied                                                                                                                                                                     | See Appendix 1 in the supplement | p.5                    | p.577                   | p.4                    | p.53                    | p.580              |
|                          | Method for selection of predictors <b>for inclusion</b> in multivariable modelling (e.g., all candidate predictors, pre-selection based on unadjusted association with the                          | Unclear                          | Unclear                | p.577                   | p.4                    | p.53                    | p.581              |
|                          | Method for selection of predictors <b>during multivariable modelling</b> (e.g., full model approach, backward or forward selection) and criteria used (e.g., p-value, Akaike Information Criterion) | Unclear                          | Unclear                | Unclear                 | Unclear                | p.53                    | Unclear            |

|                          |                                                                                                                                                                                                                      |                  |         |         |         |         |         |
|--------------------------|----------------------------------------------------------------------------------------------------------------------------------------------------------------------------------------------------------------------|------------------|---------|---------|---------|---------|---------|
|                          | Shrinkage of predictor weights or regression coefficients (e.g., no shrinkage,                                                                                                                                       | Unclear          | Unclear | Unclear | Unclear | Unclear | Unclear |
| <b>MODEL PERFORMANCE</b> | Calibration (calibration plot, calibration slope, Hosmer-Lemeshow test) and Discrimination (C-statistic, D-statistic, log-rank)                                                                                      | p.5              | Unclear | Unclear | Unclear | Unclear | Unclear |
|                          | Classification measures (e.g., sensitivity, specificity, predictive values, net reclassification improvement) and whether a-priori cut                                                                               | See e-appendix 3 | p.6     | p.577   | p.6     | No      | p.581   |
| <b>MODEL EVALUATION</b>  | Method used for testing model performance: development dataset only (random split of data, resampling methods e.g. bootstrap or cross-validation, none) or separate external validation (e.g. temporal, geographical | See e-appendix 3 | Unclear | Unclear | p.6     | No      | Unclear |



|                |                                                                                                                                                                                                            |         |         |         |         |    |         |
|----------------|------------------------------------------------------------------------------------------------------------------------------------------------------------------------------------------------------------|---------|---------|---------|---------|----|---------|
|                | In case of poor validation, whether model was adjusted or updated (e.g., intercept recalibrated, predictor effects)                                                                                        | Unclear | Unclear | Unclear | Unclear | No | Unclear |
|                | Final and other multivariable models (e.g., basic, extended, simplified) presented, including predictor weights or regression coefficients, intercept, baseline survival, model performance measures (with | Unclear | Unclear | Unclear | Unclear | No | No      |
| <b>RESULTS</b> | Any alternative presentation of the final prediction models, e.g., sum score, nomogram, score chart, predictions for specific risk subgroups                                                               | No      | No      | p.578   | p.23    | No | No      |
|                | Comparison of the distribution of predictors (including missing data) for development and validation                                                                                                       | No      | No      | No      | No      | No | No      |

|                                      |                                                                                                                            |     |     |       |     |      |       |
|--------------------------------------|----------------------------------------------------------------------------------------------------------------------------|-----|-----|-------|-----|------|-------|
| <b>INTERPRETATION AND DISCUSSION</b> | Interpretation of presented models (confirmatory, i.e., model useful for practice versus exploratory, i.e., more research) | p.7 | p.5 | p.577 | p.6 | p.56 | p.583 |
|                                      | Comparison with other studies, discussion of generalizability, strengths and limitations.                                  | p.7 | p.5 | p.577 | p.6 | p.58 | p.583 |

**JBI critical appraisal checklist for Systematic Reviews and Research Syntheses (Aromataris et al., 2015)**

| Citation                  | Q1. Is the review question clearly and explicitly stated? | Q2. Were the inclusion criteria appropriate for the review question? | Q3. Was the search strategy appropriate? | Q4. Were the sources and resources used to search for studies adequate? | Q5. Were the criteria for appraising studies appropriate? | Q6. Was critical appraisal conducted by two or more reviewers independently? | Q7. Were there methods to minimize errors in data extraction? | Q8. Were the methods used to combine studies appropriate? | Q9. Was the likelihood of publication bias assessed? | Q10. Were recommendations for policy and/or practice supported by the reported data? | Q11. Were the specific directives for new research appropriate? |
|---------------------------|-----------------------------------------------------------|----------------------------------------------------------------------|------------------------------------------|-------------------------------------------------------------------------|-----------------------------------------------------------|------------------------------------------------------------------------------|---------------------------------------------------------------|-----------------------------------------------------------|------------------------------------------------------|--------------------------------------------------------------------------------------|-----------------------------------------------------------------|
| (Camacho & Shields, 2018) | Yes                                                       | Yes                                                                  | Yes                                      | Yes                                                                     | Yes                                                       | Unclear                                                                      | Yes                                                           | Yes                                                       | Yes                                                  | Yes                                                                                  | Yes                                                             |
| (Gurung et al., 2018)     | Yes                                                       | Yes                                                                  | Yes                                      | Yes                                                                     | Yes                                                       | Unclear                                                                      | Yes                                                           | Unclear                                                   | Yes                                                  | Yes                                                                                  | Yes                                                             |
| (Moran et al., 2020)      | Yes                                                       | Yes                                                                  | Yes                                      | Yes                                                                     | Yes                                                       | Yes                                                                          | Yes                                                           | Yes                                                       | Yes                                                  | Unclear                                                                              | Yes                                                             |
| (Morrell et al., 2016)    | Yes                                                       | Yes                                                                  | Yes                                      | Yes                                                                     | Yes                                                       | Yes                                                                          | Yes                                                           | Yes                                                       | Yes                                                  | Yes                                                                                  | Yes                                                             |

**JBI Critical appraisal checklist for randomized controlled trials (Tufanaru et al., 2020)**

| Citation | Q1. Was true randomization used for assignment of | Q2. Was allocation to treatment groups | Q3. Were treatment groups similar | Q4. Were participants blind to treatment | Q5. Were those delivering treatment blind | Q6. Were outcomes assessed by assessors blind to | Q7. Were treatment groups treated identically | Q8. Was follow up complete and if not, | Q9. Were participants analyzed in the | Q10. Were outcomes measured in the | Q11. Were outcomes measured in a | Q12. Was appropriate statistical analysis | Q13. Was the trial design appropriate, and any |
|----------|---------------------------------------------------|----------------------------------------|-----------------------------------|------------------------------------------|-------------------------------------------|--------------------------------------------------|-----------------------------------------------|----------------------------------------|---------------------------------------|------------------------------------|----------------------------------|-------------------------------------------|------------------------------------------------|
|          |                                                   |                                        |                                   |                                          |                                           |                                                  |                                               |                                        |                                       |                                    |                                  |                                           |                                                |

|                        | participants to treatment groups? | concealed? | at the baseline? | assignment? | to treatment assignment? | treatment assignment? | ly other than the intervention of interest? | were differences between groups in terms of their follow up adequately described and analyzed? | to which they were randomized? | same way for treatment groups? | reliable way? | s used? | deviations from the standard RCT design (individual randomization, parallel groups) accounted for in the conduct and analysis of the trial? |
|------------------------|-----------------------------------|------------|------------------|-------------|--------------------------|-----------------------|---------------------------------------------|------------------------------------------------------------------------------------------------|--------------------------------|--------------------------------|---------------|---------|---------------------------------------------------------------------------------------------------------------------------------------------|
| (Grote et al., 2017)   | Yes                               | Yes        | Yes              | Unclear     | Yes                      | Unclear               | Yes                                         | Yes                                                                                            | No                             | Yes                            | Unclear       | Yes     | N/A                                                                                                                                         |
| (Morrill et al., 2000) | Yes                               | Yes        | Yes              | Yes         | Yes                      | Unclear               | Yes                                         | Yes                                                                                            | Yes                            | Yes                            | Yes           | Yes     | Yes                                                                                                                                         |

### JBICritical Appraisal Checklist for Cohort Studies (Moola et al., 2020)

| Citation                   | Q1. Were the two groups similar and recruited from the same population? | Q2. Were the exposures measured similarly to assign people to both exposed and unexposed groups? | Q3. Was the exposure measured in a valid and reliable way? | Q4. Were confounding factors identified? | Q5. Were strategies to deal with confounding factors stated? | Q6. Were the groups/ participants free of the outcome at the start of the study (or at the moment of exposure)? | Q7. Were the outcomes measured in a valid and reliable way? | Q8. Was the follow up time reported and sufficient to be long enough for outcomes to occur? | Q9. Was follow up complete, and if not, were the reasons to loss to follow up described and explored? | Q10. Were strategies to address incomplete follow up utilized? | Q11. Was appropriate statistical analysis used? |
|----------------------------|-------------------------------------------------------------------------|--------------------------------------------------------------------------------------------------|------------------------------------------------------------|------------------------------------------|--------------------------------------------------------------|-----------------------------------------------------------------------------------------------------------------|-------------------------------------------------------------|---------------------------------------------------------------------------------------------|-------------------------------------------------------------------------------------------------------|----------------------------------------------------------------|-------------------------------------------------|
| (Moore Simas et al., 2020) | Yes                                                                     | Yes                                                                                              | Yes                                                        | No                                       | No                                                           | Yes                                                                                                             | Yes                                                         | Yes                                                                                         | Unclear                                                                                               | N/A                                                            | Yes                                             |

### JBICritical Appraisal Checklist for Cross-sectional studies (Moola et al., 2020)

| Citation            | Q1. Were the criteria for inclusion in the sample clearly defined? | Q2. Were the study subjects and the setting described in detail? | Q3. Was the exposure measured in a valid and reliable way? | Q4. Were objective, standard criteria used for measurement of the condition? | Q5. Were confounding factors identified? | Q6. Were strategies to deal with confounding factors stated? | Q7. Were the outcomes measured in a valid and reliable way? | Q8. Was appropriate statistical analysis used? |
|---------------------|--------------------------------------------------------------------|------------------------------------------------------------------|------------------------------------------------------------|------------------------------------------------------------------------------|------------------------------------------|--------------------------------------------------------------|-------------------------------------------------------------|------------------------------------------------|
| Dagher et al., 2012 | Yes                                                                | Yes                                                              | Yes                                                        | Yes                                                                          | No                                       | No                                                           | Yes                                                         | Yes                                            |

1  
2  
3  
4  
5  
6  
7  
8  
9  
10  
11  
12  
13  
14  
15  
16  
17  
18  
19  
20  
21  
22  
23  
24  
25  
26  
27  
28  
29  
30  
31  
32  
33  
34  
35  
36  
37  
38  
39  
40  
41  
42  
43  
44  
45  
46  
47  
48  
49  
50  
51  
52  
53  
54  
55  
56  
57  
58  
59  
60

|                       |     |     |     |     |     |     |     |         |
|-----------------------|-----|-----|-----|-----|-----|-----|-----|---------|
| Chojenta et al., 2019 | Yes | Yes | Yes | Yes | Yes | Yes | Yes | Unclear |
| Ammerman et al., 2016 | Yes | Yes | Yes | Yes | Yes | Yes | Yes | Yes     |
| Roberts et al., 2001  | Yes | Yes | Yes | Yes | No  | N/A | Yes | Yes     |

For peer review only

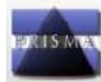

## PRISMA 2020 checklist

| Section and Topic             | Item # | Checklist item                                                                                                                                                                                                                                                                                       | Location where item is reported |
|-------------------------------|--------|------------------------------------------------------------------------------------------------------------------------------------------------------------------------------------------------------------------------------------------------------------------------------------------------------|---------------------------------|
| <b>TITLE</b>                  |        |                                                                                                                                                                                                                                                                                                      |                                 |
| Title                         | 1      | Identify the report as a systematic review.                                                                                                                                                                                                                                                          | Page 2                          |
| <b>ABSTRACT</b>               |        |                                                                                                                                                                                                                                                                                                      |                                 |
| Abstract                      | 2      | See the PRISMA 2020 for Abstracts checklist.                                                                                                                                                                                                                                                         | Figure 1                        |
| <b>INTRODUCTION</b>           |        |                                                                                                                                                                                                                                                                                                      |                                 |
| Rationale                     | 3      | Describe the rationale for the review in the context of existing knowledge.                                                                                                                                                                                                                          | Page 4                          |
| Objectives                    | 4      | Provide an explicit statement of the objective(s) or question(s) the review addresses.                                                                                                                                                                                                               | Page 4                          |
| <b>METHODS</b>                |        |                                                                                                                                                                                                                                                                                                      |                                 |
| Eligibility criteria          | 5      | Specify the inclusion and exclusion criteria for the review and how studies were grouped for the syntheses.                                                                                                                                                                                          | Page 5                          |
| Information sources           | 6      | Specify all databases, registers, websites, organisations, reference lists and other sources searched or consulted to identify studies. Specify the date when each source was last searched or consulted.                                                                                            | Page 5                          |
| Search strategy               | 7      | Present the full search strategies for all databases, registers and websites, including any filters and limits used.                                                                                                                                                                                 | Supplementary Material          |
| Selection process             | 8      | Specify the methods used to decide whether a study met the inclusion criteria of the review, including how many reviewers screened each record and each report retrieved, whether they worked independently, and if applicable, details of automation tools used in the process.                     | Page 6                          |
| Data collection process       | 9      | Specify the methods used to collect data from reports, including how many reviewers collected data from each report, whether they worked independently, any processes for obtaining or confirming data from study investigators, and if applicable, details of automation tools used in the process. | Page 6                          |
| Data items                    | 10a    | List and define all outcomes for which data were sought. Specify whether all results that were compatible with each outcome domain in each study were sought (e.g. for all measures, time points, analyses), and if not, the methods used to decide which results to collect.                        | Page 6                          |
|                               | 10b    | List and define all other variables for which data were sought (e.g. participant and intervention characteristics, funding sources). Describe any assumptions made about any missing or unclear information.                                                                                         | Page 6                          |
| Study risk of bias assessment | 11     | Specify the methods used to assess risk of bias in the included studies, including details of the tool(s) used, how many reviewers assessed each study and whether they worked independently, and if applicable, details of automation tools used in the process.                                    | Supplementary Material          |
| Effect measures               | 12     | Specify for each outcome the effect measure(s) (e.g. risk ratio, mean difference) used in the synthesis or presentation of results.                                                                                                                                                                  | Page 8                          |
| Synthesis methods             | 13a    | Describe the processes used to decide which studies were eligible for each synthesis (e.g. tabulating the study intervention characteristics and comparing against the planned groups for each synthesis (item #5)).                                                                                 | Page 6                          |
|                               | 13b    | Describe any methods required to prepare the data for presentation or synthesis, such as handling of missing summary statistics, or data conversions.                                                                                                                                                | Page 6                          |
|                               | 13c    | Describe any methods used to tabulate or visually display results of individual studies and syntheses.                                                                                                                                                                                               | From Page 9                     |
|                               | 13d    | Describe any methods used to synthesize results and provide a rationale for the choice(s). If meta-analysis was performed, describe the model(s), method(s) to identify the presence and extent of statistical heterogeneity, and software package(s) used.                                          | Page 8                          |
|                               | 13e    | Describe any methods used to explore possible causes of heterogeneity among study results (e.g. subgroup analysis, meta-regression).                                                                                                                                                                 | N/A                             |
|                               | 13f    | Describe any sensitivity analyses conducted to assess robustness of the synthesized results.                                                                                                                                                                                                         | N/A                             |
| Reporting bias assessment     | 14     | Describe any methods used to assess risk of bias due to missing results in a synthesis (arising from reporting biases).                                                                                                                                                                              | Supplementary Material          |
| Certainty                     | 15     | Describe any methods used to assess certainty (or confidence) in the body of evidence for an outcome.                                                                                                                                                                                                |                                 |

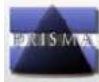

# PRISMA 2020 checklist

| Section and Topic                              | Item # | Checklist item                                                                                                                                                                                                                                                                       | Location where item is reported |
|------------------------------------------------|--------|--------------------------------------------------------------------------------------------------------------------------------------------------------------------------------------------------------------------------------------------------------------------------------------|---------------------------------|
| assessment                                     |        |                                                                                                                                                                                                                                                                                      |                                 |
| <b>RESULTS</b>                                 |        |                                                                                                                                                                                                                                                                                      |                                 |
| Study selection                                | 16a    | Describe the results of the search and selection process, from the number of records identified in the search to the number of studies included in the review, ideally using a flow diagram.                                                                                         | Page 8                          |
|                                                | 16b    | Cite studies that might appear to meet the inclusion criteria, but which were excluded, and explain why they were excluded.                                                                                                                                                          | Page 8                          |
| Study characteristics                          | 17     | Cite each included study and present its characteristics.                                                                                                                                                                                                                            | Page 8                          |
| Risk of bias in studies                        | 18     | Present assessments of risk of bias for each included study.                                                                                                                                                                                                                         | Page 8                          |
| Results of individual studies                  | 19     | For all outcomes, present, for each study: (a) summary statistics for each group (where appropriate) and (b) an effect estimate and its precision (e.g. confidence/credible interval), ideally using structured tables or plots.                                                     | Page 8                          |
| Results of syntheses                           | 20a    | For each synthesis, briefly summarise the characteristics and risk of bias among contributing studies.                                                                                                                                                                               | Page 8                          |
|                                                | 20b    | Present results of all statistical syntheses conducted. If meta-analysis was done, present for each the summary estimate and its precision (e.g. confidence/credible interval) and measures of statistical heterogeneity. If comparing groups, describe the direction of the effect. | Page 8                          |
|                                                | 20c    | Present results of all investigations of possible causes of heterogeneity among study results.                                                                                                                                                                                       | Page 8                          |
|                                                | 20d    | Present results of all sensitivity analyses conducted to assess the robustness of the synthesized results.                                                                                                                                                                           | N/A                             |
| Reporting biases                               | 21     | Present assessments of risk of bias due to missing results (arising from reporting biases) for each synthesis assessed.                                                                                                                                                              | Supplementary Material          |
| Certainty of evidence                          | 22     | Present assessments of certainty (or confidence) in the body of evidence for each outcome assessed.                                                                                                                                                                                  | Supplementary Material          |
| <b>DISCUSSION</b>                              |        |                                                                                                                                                                                                                                                                                      |                                 |
| Discussion                                     | 23a    | Provide a general interpretation of the results in the context of other evidence.                                                                                                                                                                                                    | Page 25                         |
|                                                | 23b    | Discuss any limitations of the evidence included in the review.                                                                                                                                                                                                                      | Page 2                          |
|                                                | 23c    | Discuss any limitations of the review processes used.                                                                                                                                                                                                                                | N/A                             |
|                                                | 23d    | Discuss implications of the results for practice, policy, and future research.                                                                                                                                                                                                       | Page 26                         |
| <b>OTHER INFORMATION</b>                       |        |                                                                                                                                                                                                                                                                                      |                                 |
| Registration and protocol                      | 24a    | Provide registration information for the review, including register name and registration number, or state that the review was not registered.                                                                                                                                       | Page 5                          |
|                                                | 24b    | Indicate where the review protocol can be accessed, or state that a protocol was not prepared.                                                                                                                                                                                       | Page 5                          |
|                                                | 24c    | Describe and explain any amendments to information provided at registration or in the protocol.                                                                                                                                                                                      | N/A                             |
| Support                                        | 25     | Describe sources of financial or non-financial support for the review, and the role of the funders or sponsors in the review.                                                                                                                                                        | Page 27                         |
| Competing interests                            | 26     | Declare any competing interests of review authors.                                                                                                                                                                                                                                   | Page 27                         |
| Availability of data, code and other materials | 27     | Report which of the following are publicly available and where they can be found: template data collection forms; data extracted from included studies; data used for all analyses; analytic code; any other materials used in the review.                                           | Page 9 onwards                  |

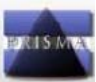

# PRISMA 2020 checklist

- 1
- 2
- 3
- 4
- 5
- 6
- 7
- 8
- 9
- 10
- 11
- 12
- 13
- 14
- 15
- 16
- 17
- 18
- 19
- 20
- 21
- 22
- 23
- 24
- 25
- 26
- 27
- 28
- 29
- 30
- 31
- 32
- 33
- 34
- 35
- 36
- 37
- 38
- 39
- 40
- 41
- 42
- 43
- 44
- 45
- 46
- 47

From: Page MJ, McKenzie JE, Bossuyt PM, Boutron I, Hoffmann TC, Mulrow CD, et al. The PRISMA 2020 statement: an updated guideline for reporting systematic reviews. *BMJ* 2021;372:n71. doi: 10.1136/bmj.n71  
 For more information, visit: <http://www.prisma-statement.org/>

For peer review only

# BMJ Open

## Health economic evaluations of preventative care for perinatal anxiety and associated disorders: A rapid review

|                                 |                                                                                                                                                                                                                                                                                                                                                                                         |
|---------------------------------|-----------------------------------------------------------------------------------------------------------------------------------------------------------------------------------------------------------------------------------------------------------------------------------------------------------------------------------------------------------------------------------------|
| Journal:                        | <i>BMJ Open</i>                                                                                                                                                                                                                                                                                                                                                                         |
| Manuscript ID                   | bmjopen-2022-068941.R1                                                                                                                                                                                                                                                                                                                                                                  |
| Article Type:                   | Original research                                                                                                                                                                                                                                                                                                                                                                       |
| Date Submitted by the Author:   | 04-Apr-2023                                                                                                                                                                                                                                                                                                                                                                             |
| Complete List of Authors:       | Pisavadia, Kalpa; Bangor University, School of Medical and Health Sciences<br>Spencer, Llinos; Bangor University, Centre for Health Economics and Medicine Evaluation<br>Tuersley, Lorna; Bangor University,<br>Coates, Rose ; City University of London,<br>Ayers, Susan; City University,<br>Edwards, Rhiannon; Bangor University, Centre for Health Economics & Medicines Evaluation |
| <b>Primary Subject Heading</b>: | Health economics                                                                                                                                                                                                                                                                                                                                                                        |
| Secondary Subject Heading:      | Health economics                                                                                                                                                                                                                                                                                                                                                                        |
| Keywords:                       | HEALTH ECONOMICS, PREVENTIVE MEDICINE, MENTAL HEALTH, Postpartum Women < Postpartum Period                                                                                                                                                                                                                                                                                              |
|                                 |                                                                                                                                                                                                                                                                                                                                                                                         |

SCHOLARONE™  
Manuscripts





I, the Submitting Author has the right to grant and does grant on behalf of all authors of the Work (as defined in the below author licence), an exclusive licence and/or a non-exclusive licence for contributions from authors who are: i) UK Crown employees; ii) where BMJ has agreed a CC-BY licence shall apply, and/or iii) in accordance with the terms applicable for US Federal Government officers or employees acting as part of their official duties; on a worldwide, perpetual, irrevocable, royalty-free basis to BMJ Publishing Group Ltd ("BMJ") its licensees and where the relevant Journal is co-owned by BMJ to the co-owners of the Journal, to publish the Work in this journal and any other BMJ products and to exploit all rights, as set out in our [licence](#).

The Submitting Author accepts and understands that any supply made under these terms is made by BMJ to the Submitting Author unless you are acting as an employee on behalf of your employer or a postgraduate student of an affiliated institution which is paying any applicable article publishing charge ("APC") for Open Access articles. Where the Submitting Author wishes to make the Work available on an Open Access basis (and intends to pay the relevant APC), the terms of reuse of such Open Access shall be governed by a Creative Commons licence – details of these licences and which [Creative Commons](#) licence will apply to this Work are set out in our licence referred to above.

Other than as permitted in any relevant BMJ Author's Self Archiving Policies, I confirm this Work has not been accepted for publication elsewhere, is not being considered for publication elsewhere and does not duplicate material already published. I confirm all authors consent to publication of this Work and authorise the granting of this licence.

# Health economic evaluations of preventative care for perinatal anxiety and associated disorders: A rapid review

Miss Kalpa Pisavadia [Kalpa.pisavadia@bangor.ac.uk](mailto:Kalpa.pisavadia@bangor.ac.uk)

Dr Llinos Haf Spencer [L.spencer@bangor.ac.uk](mailto:L.spencer@bangor.ac.uk)

Dr Lorna Tuersley [Lorna.tuersley@gmail.com](mailto:Lorna.tuersley@gmail.com)

Dr Rose Coates [Rose.coates@city.ac.uk](mailto:Rose.coates@city.ac.uk)

Professor Susan Ayers [Susan.ayers.1@city.ac.uk](mailto:Susan.ayers.1@city.ac.uk)

Professor Rhiannon Tudor Edwards [R.t.edwards@bangor.ac.uk](mailto:R.t.edwards@bangor.ac.uk)

**Corresponding author:** Kalpa Pisavadia Research Project Support Officer, Centre for Health Economics and Medicines Evaluation (CHEME), Ardudwy Hall, Normal Site, Bangor University, Bangor, Gwynedd, Wales, UK, LL57 2PZ. Email: [Kalpa.pisavadia@bangor.ac.uk](mailto:Kalpa.pisavadia@bangor.ac.uk)

## Abstract

**Background:** Perinatal mental health (PMH) problems affect one in five women and cost the United Kingdom (UK) £8.1 billion for every year of births, with 72% of this cost due to the long-term impact on the child.

**Aim:** The aim of this rapid review was to investigate the type of health economic evaluations of preventative care for perinatal anxiety and associated disorders carried out within the National Health Service (NHS) and similar healthcare systems.

**Methodology:** This study adopted a rapid review approach, using principles of the standard systematic review process to generate quality evidence. This methodology features a systematic database search, PRISMA diagram, screening of evidence, data extraction, critical appraisal, and narrative synthesis.

**Results:** Database searches yielded 3,212 results published between January 2000 and July 2022. Titles and abstracts were screened, and Seventeen studies were included. Of these seventeen included papers, there were cost-effectiveness studies (n=6), modelling studies (n=6), cost-benefit study (n=1), a cost analysis study (n=1) and cost of illness studies (n=4).

**Discussion:** The results indicate a lack of economic evaluation specifically for perinatal anxiety, with most studies focussing on postnatal depression (PND). Interventions to prevent postnatal mental health problems being cost-effective. Modelling studies have also been conducted, which suggest that treating PND with counselling would be cost-effective.

**Conclusion:** The costs of not intervening in maternal mental health outweigh the costs of preventative interventions. Preventative measures such as screening and counselling for maternal mental health are shown to be cost-effective interventions to improve outcomes for women and children.

**Key words:** preventative, life-course, perinatal anxiety, postnatal depression, cost of illness, cost-effectiveness, economic modelling.

## Article summary

### Strengths of the rapid review

- The strength of this rapid review is that it has highlighted costs associated with perinatal mental health interventions in a rigorous, novel way which will benefit the NIHR funded (Award number: NIHR133727) Map Alliance Project team with the economic evaluation for that study (currently in progress).

### Limitations of the rapid review

- There is an absence of health economic studies describing the range of public sector costs and costs to individuals from Scotland and Wales in relation to perinatal anxiety.
- Although health economic studies are showing the benefits of investing in PND, there are no published UK-based RCTs investigating perinatal mental

1  
2  
3 health interventions, which include information on costs (RCT's is the most  
4 scientifically rigorous method of hypothesis testing available and is regarded  
5 as the gold standard trial for evaluating the effectiveness of interventions).  
6 This indicates an evidence gap.  
7

## 8 9 Introduction

10 The perinatal period refers to pregnancy and the first 12 months after childbirth [1].  
11 One in five women experienced mental health problems during this time, and the  
12 cost is estimated to be £8.1 billion for every year of births in the United Kingdom  
13 (UK) [2] (see supplementary file 1 for a list of abbreviations). Maternal mental health  
14 problems include postnatal depression (PND) (also known as Postpartum  
15 Depression (PPD) internationally), characterised by depressed mood and anxiety,  
16 feelings of inadequacy, and impaired infant bonding [3]. More severe maternal  
17 mental health issues, such as postpartum psychosis, can present with feelings of  
18 agitation, confusion, hallucinations, and delusions [4]. Crucially, suicide is the leading  
19 cause of maternal death in the perinatal period [5]. It is, thus, imperative that  
20 proactive planning and cost-effective preventative solutions are a public policy  
21 priority.  
22  
23  
24  
25  
26  
27

28 The Maternal Mental Health Alliance warns that the COVID-19 pandemic may lead  
29 to a potential increase in perinatal mental health (PMH) difficulties [6]. A recent  
30 scoping review on the impact of the COVID-19 pandemic on maternal and perinatal  
31 health found that during pregnancy, self-reported rates of clinically relevant anxiety  
32 and depressive symptoms were higher among pregnant women compared to pre-  
33 pandemic levels [7]. Women who experience non-health-related stressors such as  
34 marital, housing, and financial difficulties or live in economically deprived areas were  
35 already at higher risk of PMH issues prior to the pandemic [8]. The COVID-19  
36 pandemic further exacerbated the risk of impaired mental health due to limited  
37 antenatal care, reduced family support, social distancing, and quarantine rules.  
38 These factors, in combination with anxieties surrounding the transmission of the  
39 COVID-19 disease, have been found to significantly impact maternal mental health  
40 [7].  
41  
42  
43  
44  
45  
46

47 Untreated maternal mental illness not only impacts mothers but also adversely  
48 impacts their children, significantly contributing to wider societal and National Health  
49 Service (NHS) costs. Of the total costs of perinatal mental health difficulties in the  
50 UK, 72% is due to the long-term impact on the child [2]. An economic evaluation of a  
51 South London cohort found that for each child exposed to maternal perinatal  
52 depression, public sector costs exceeded £3,030. Costs due to reduced earnings  
53 were £1,400 per child, and health-related quality of life loss was valued at £3,760 per  
54 child [9].  
55  
56  
57  
58  
59  
60

1  
2  
3 Public sector costs are likely to be significantly reduced by utilising a prevention  
4 strategy to reduce the incidence of poor maternal mental health [9]. Decreased  
5 maternal and infant bonding, reduced breastfeeding initiation rates and duration, low  
6 birth weight, and poorer child growth have been associated with PND [10]. The  
7 regression analyses from an Australian cohort study revealed that children of  
8 mothers experiencing sub-clinical and increasing and persistently high depressive  
9 symptoms were twice as likely to have emotional and behavioural difficulties than  
10 children of mothers reporting minimal symptoms [11]. Delayed or impaired cognitive,  
11 linguistic, physical, and psychological health development has been reported in  
12 infants and children with mothers with PND [10]. There is also a risk of  
13 intergenerational transmission of socio-economic disadvantage in which maternal  
14 mental illness impacts the child's quality of life by having a long-term adverse effect  
15 on education and employment prospects [9,12].  
16  
17  
18  
19  
20  
21

22 Despite the long-term risks of untreated maternal mental health issues, as of 2014 in  
23 the UK, only 30-50% of women with PMH problems were identified, and only 7%  
24 were referred to specialist care [2]. Most women with PMH problems did not access  
25 care [2]. This may have been particularly the case for women with mild to moderate  
26 PMH problems or less commonly recognised problems, such as anxiety, obsessive-  
27 compulsive disorder (OCD), or post-traumatic stress disorder (PTSD) [2].  
28 Furthermore, access to care may also be limited by maternal time constraints and  
29 fears of being judged [13]. Web-based approaches for delivering interventions could  
30 be a promisingly cost-effective solution in supporting mothers in the perinatal period  
31 by widening access to care, which hospitals could adopt as postnatal care support. A  
32 recent cost-effectiveness study, within a randomised controlled trial (RCT), evaluated  
33 a web-based approach for delivering a psychoeducational intervention [14]. This  
34 web-based approach was not only cost-effective in supporting first-time mothers but  
35 also had the best improvements in self-efficacy, social support, and psychological  
36 well-being of women in Singapore.  
37  
38  
39  
40  
41  
42

43 The National Institute for Health and Care Excellence recommend postnatal care for  
44 up to eight weeks after birth [15]. Since 2015, it has been recommended that UK  
45 midwives carry out emotional well-being checks at antenatal check-ups and at each  
46 postnatal contact up to eight weeks after birth. Women should be asked about their  
47 emotional well-being, what family and social support they have and their usual  
48 coping strategies for dealing with day-to-day matters. In 2018, the National  
49 Collaborating Centre for Mental Health worked with NICE to develop the Perinatal  
50 Mental Health Care Pathway [16]. The guidance in that report follows a process  
51 agreed upon by NICE and sets out pathways to deliver a strategic transformation of  
52 perinatal mental health care. Psychological interventions, either alone or in  
53 conjunction with pharmacological treatment, are recommended for complex or  
54 severe mental health problems following referral to a specialist community perinatal  
55 mental health team [1].  
56  
57  
58  
59  
60

1  
2  
3 Since 2015 there have been improvements to funding plans and commitments in the  
4 provision of more specialist Community Perinatal Mental Health Services across the  
5 UK. For example, in 2019, the Scottish Government revealed that £52 million would  
6 be spent on improving access to perinatal and infant mental health services, and  
7 from 2018 to 2020, the Welsh Government increased recurrent annual funding from  
8 £1.5 million to £2.5 million for specialist PMH services [6]. In England, the  
9 Government committed £365 million to provide specialist perinatal community  
10 services across the country, as announced by NHS England in April 2019 [15].  
11 However, it is questionable whether there is sufficient funding for long-term plans  
12 and where the investment for the workforce across the UK will come from [6].  
13  
14  
15

16 Four systematic reviews investigating the clinical and cost-effectiveness of  
17 interventions to prevent postnatal depression have been published over the last  
18 decade [17–20]. The interventions included cognitive–behavioural therapy (CBT)  
19 approaches, psychotherapy, educational approaches, and peer-support based  
20 interventions to improve outcomes for women with poor postnatal mental health.  
21 Some studies investigated economic costs, and some studies investigated the  
22 clinical effectiveness and cost-effectiveness of interventions to prevent poor  
23 postnatal mental health. Some interventions were neither clinically effective nor cost-  
24 effective. Some interventions were neither clinically effective nor cost-  
25 effective.  
26  
27

### 28 Aim

29 The aim of this rapid review was to investigate the type of health economic  
30 evaluations of preventative care for perinatal anxiety and associated disorders  
31 carried out within the National Health Service (NHS) and similar healthcare systems.  
32 The full protocol for this rapid review is available from PROSPERO [21].  
33  
34  
35  
36  
37

### 38 Methods

39 This study adopted a rapid review approach, utilising principles from the standard  
40 systematic review process to generate quality evidence in a shorter time frame. This  
41 methodology follows the minimum requirements for rapid reviews, featuring a  
42 systematic database search, PRISMA diagram [22] (see figure 1) screening of  
43 evidence, data extraction, critical appraisal, and narrative synthesis. This revised  
44 methodology is used by the Wales COVID-19 Evidence Centre [23–25]. Cost-  
45 effectiveness outcomes are reported according to The Professional Society for  
46 Health Economics and Outcomes Research (ISPOR) guidelines [26].  
47  
48  
49  
50

### 51 Patient and Public Involvement

52 None  
53  
54  
55

### 56 Search Strategy

57 The key evidence sources of this rapid review included PubMed, Cumulative Index  
58 to Nursing and Allied Health Literature (CINAHL), Cochrane Library, Applied Social  
59  
60

Sciences Index and Abstracts (ASSIA), PsycINFO and MEDLINE. The search terms consisted of words related to perinatal anxiety and/or depression, health and psychiatric services and economic evaluation terms. The searches were conducted on 23 April 2022. Mendeley reference management software was used to manage study articles found and remove duplicates. See supplementary file 1 for the full search strategy.

The eligibility criteria for the review are presented in Table 1 and are based on the Population, Intervention, Comparison and Outcome (PICO) framework [27]. This consisted of peer-reviewed economic evaluations of perinatal anxiety and associated disorders such as PND and PTSD from Organisation for Economic Co-operation and Development (OECD) countries in English published after January 2000.

**Table 1: Participants, Intervention/exposure, Comparator and Outcomes (PICO) framework**

| <b>Question</b>                                                                             |                                                                                                              |
|---------------------------------------------------------------------------------------------|--------------------------------------------------------------------------------------------------------------|
| What is the cost of care for women experiencing perinatal anxiety and associated disorders? |                                                                                                              |
| <b>Participants</b>                                                                         | Pregnant women or perinatal women                                                                            |
| <b>Intervention / exposure</b>                                                              | Perinatal anxiety and associated disorders                                                                   |
| <b>Comparator</b>                                                                           | No comparator                                                                                                |
| <b>Outcomes</b>                                                                             | Costs of primary care and support services for women experiencing perinatal anxiety and associated disorders |
| <b>Study Considerations</b>                                                                 |                                                                                                              |
| Primary research, secondary research, grey literature, and preprints                        |                                                                                                              |
| <b>Databases</b>                                                                            |                                                                                                              |
| PubMed, CINAHL, Cochrane Library, ASSIA, PsycINFO, and MEDLINE                              |                                                                                                              |

### Selection of studies

One reviewer (KP) independently selected potentially eligible studies based on a screening of titles and abstracts. Two reviewers (LHS and KP) selected additional studies from existing systematic reviews. The full texts of selected studies were assessed for eligibility by three reviewers (KP and LHS, with mediation by LT) in the data extraction process.

### Data extraction

Data extraction and study quality assessment were performed by three reviewers (KP, LHS, LT). Data was collected on country, study design, intervention type, data collection methods and dates, sample size, and type of participants (See supplementary file 2 for data extraction tables).

### Quality assessment

The quality assessment was undertaken by two reviewers (LHS and KP), and four papers were checked by a third reviewer for quality assurance purposes (LT). The Drummond checklist [28] was used for the quality appraisal of health economic papers, and the checklist for critical appraisal and data extraction for systematic reviews of prediction modelling studies (CHARMS) checklist was used for the modelling studies [29]. The Joanna Briggs Institute (JBI) critical appraisal tools were used for the quality appraisal, randomised clinical trials, cohort studies and cross-sectional studies [30–32] (see supplementary file 1).

**[Insert figure 1 here]**



## Results

Searches of databases yielded 3212 results, of which 1226 duplicates were removed. The remaining 1986 results were screened against titles and abstracts, and an additional four papers were retrieved from existing systematic reviews. A total of 17 papers met the criteria for full-text screening. Eleven papers were excluded due to not being able to access the full text (n=4), ineligible study design (n=5), or lack of relevancy (non-OECD country) (n=2). Seventeen studies were included in this rapid review (see Figure 1 and Table 2).

Of these seventeen included papers, there were cost-effectiveness studies (n=5), modelling studies (n=6), cost-benefit study (n=1), a cost analysis study (n=1) and cost of illness studies (n=4). All included studies were peer-reviewed. The included studies were categorised according to main intervention: children, prevention, cost of maternal health, cost of single interventions, and comparison cost of interventions. The following discussion provides a more detailed overview of the findings.

**Table 2: Map of maternal cost of illness studies by evidence type (including studies on depression, anxiety and maternal health and well-being)**

| Type of Evidence               | Type of intervention           |                              |                             |                              |                                  | Number of studies |
|--------------------------------|--------------------------------|------------------------------|-----------------------------|------------------------------|----------------------------------|-------------------|
|                                | Children                       | Prevention                   | Cost of maternal health     | Cost of single interventions | Comparison cost of interventions |                   |
| Cost-effectiveness             |                                | Petrou et al. (2006) [3]     |                             | Morrell et al. (2000) [33]   | Henderson et al. (2019) [34]     | 5                 |
|                                |                                | Ride et al. (2016) [35]      |                             | Stevenson et al. (2010) [36] |                                  |                   |
| Cost-benefit                   |                                |                              |                             |                              | Grote et al. (2017) [37]         | 1                 |
| Cost-analysis                  | Moore Simas et al. (2020) [10] |                              |                             |                              |                                  | 1                 |
| Cost-of-illness                |                                |                              | Petrou et al. (2002) [38]   |                              |                                  | 4                 |
|                                |                                |                              | Dagher et al. (2012) [39]   |                              |                                  |                   |
|                                |                                |                              | Ammerman et al. (2016) [40] |                              |                                  |                   |
|                                |                                |                              | Roberts et al. (2001) [41]  |                              |                                  |                   |
| Economic modelling studies     | Bauer et al. (2015) [9]        | Counts et al. (2022) [42,43] | Franta et al. (2022) [43]   |                              |                                  | 6                 |
|                                | Ride (2018) [44]               | Wilkinson et al. (2017) [4]  | Chojenta et al. (2019) [45] |                              |                                  |                   |
| <b>Total number of studies</b> | <b>3</b>                       | <b>4</b>                     | <b>6</b>                    | <b>2</b>                     | <b>2</b>                         | <b>17</b>         |

Table 3: Methodological considerations and cost-effectiveness results

| Lead author (Year)          | Intervention                                                                                                                                                                                                  | Perspective (reasons)                                                   | Time horizon used in economic evaluation (reasons)                                                                                                                            | Discounting                                                                                                        | Key cost-effectiveness results                                                                                                                                                                                                                                                                                                                                                                                                                                                                                                                                  |
|-----------------------------|---------------------------------------------------------------------------------------------------------------------------------------------------------------------------------------------------------------|-------------------------------------------------------------------------|-------------------------------------------------------------------------------------------------------------------------------------------------------------------------------|--------------------------------------------------------------------------------------------------------------------|-----------------------------------------------------------------------------------------------------------------------------------------------------------------------------------------------------------------------------------------------------------------------------------------------------------------------------------------------------------------------------------------------------------------------------------------------------------------------------------------------------------------------------------------------------------------|
| Henderson et al (2019) [34] | <b>Intervention group:</b> PoNDER: Health visitor (HV) training to assess postnatal depression (PND) and deliver psychological approaches to women at risk of depression.<br><b>Control group:</b> Usual care | NHS and social care perspective.                                        | Resource use data from 6 weeks to 6 months were collected on a resource use log completed by HVs based on their own and GP records                                            | No discounting was necessary due to the duration of the follow-up period.                                          | Costs and outcomes data were available for 1459 participants. 6-month adjusted costs were £82 lower in intervention than control groups, with 0.002 additional QALY gained. The probability of cost-effectiveness at £20,000 was very high (99%).                                                                                                                                                                                                                                                                                                               |
| Morrell et al (2000) [33]   | <b>Intervention group:</b> up to 10 home visits in the first postnatal month of up to three hours duration by a community postnatal support worker.<br><b>Control group:</b> Usual care                       | NHS perspective                                                         | Up to 10 home visits in the first postnatal month of up to three hours duration by a community postnatal support worker, and a 6-month follow-up.                             | No                                                                                                                 | Cost data showed that at six weeks the mean total NHS costs were £635 for the intervention group and £456 for the control group (P = 0.001). At six months figures were £815 and £639 (P = 0.001).<br><br>However, due to there being no differences between the groups in use of social services or personal costs, no cost-effectiveness analysis was conducted.                                                                                                                                                                                              |
| Petrou et al (2006) [3]     | <b>Intervention group:</b> counselling and specific support for the mother relationship, targeted at women at high risk of developing postnatal depression.<br><b>Control group:</b> Usual care               | The economic evaluation was conducted from a public sector perspective. | The time horizon for the economic evaluation mirrored the time horizon for the randomized controlled trial, namely the period between randomization and 18 months postpartum. | Various discounting rates were applied as necessary: 0 percent, 1.5 percent, 3 percent, 6 percent, and 10 percent. | The mean health and social care costs were estimated at £2,396.9 per mother-infant dyad in the preventive intervention group and £2,277.5 per mother-infant dyad in the routine primary care group, providing a mean cost difference of £119.5 (bootstrap 95 percent confidence interval [CI], -535.4, 784.9). At a willingness to pay threshold of £1,000 per month of postnatal depression avoided, the probability that the preventive intervention is cost-effective is .71 and the mean net benefit is £383.4 (bootstrap 95 percent CI, -£863.3-£1,581.5). |
| Ride et al (2016) [35]      | Intervention group: What Were We Thinking (WWWTT) - a psychoeducational intervention targeted at the partner                                                                                                  | A range of perspectives including patient, NHS, and social services.    | The time horizon of 6 months mirrored the trial follow-up period. No                                                                                                          | No discounting was necessary due to the duration of the follow-up period.                                          | The incremental cost-effectiveness ratios were \$A36 451 per QALY gained and \$A152 per percentage point reduction in 30-                                                                                                                                                                                                                                                                                                                                                                                                                                       |

|                             |                                                                                                        |                           |                                                   |                                                                           |                                                                                                                                                                                                                                                                                                                                                                                                                                                                                                                                                                                                                                                                                                          |
|-----------------------------|--------------------------------------------------------------------------------------------------------|---------------------------|---------------------------------------------------|---------------------------------------------------------------------------|----------------------------------------------------------------------------------------------------------------------------------------------------------------------------------------------------------------------------------------------------------------------------------------------------------------------------------------------------------------------------------------------------------------------------------------------------------------------------------------------------------------------------------------------------------------------------------------------------------------------------------------------------------------------------------------------------------|
|                             | relationship, management of infant behaviour and parental fatigue.<br><b>Control group:</b> Usual care |                           |                                                   |                                                                           | day prevalence of depression, anxiety, and adjustment disorders. The estimate lies under the unofficial cost-effectiveness threshold of \$A55 000 per QALY; however, there was considerable uncertainty surrounding the results, with a 55% probability that WWWT would be considered cost-effective at that threshold.                                                                                                                                                                                                                                                                                                                                                                                  |
| Stevenson et al (2010) [36] | <b>Intervention group:</b> Cognitive Behaviour Therapy (gCBT).<br><b>Control group:</b> Usual care     | Health sector perspective | Treatment up to 8 weeks, and a 6-month follow-up. | No discounting was necessary due to the duration of the follow-up period. | The use of gCBT does not appear to be cost-effective.<br><br>The mean cost per quality adjusted life year (QALY) from the stochastic analysis was estimated to be £36,062; however, there was considerable uncertainty around this value. The expected value of perfect information (EVPI) was estimated to be greater than £64 million; the key uncertainties were in the cost per woman of providing treatment and in the statistical relationship between changes in the Edinburgh Postnatal Depression Scale (EPDS) values and changes in the Short Form – 6 Dimensions (SF-6D) values. The expected value of perfect partial information for both of these parameters was in excess of £25 million. |

The included papers are organised under three different themes. The first theme is studies including perinatal anxiety, the second theme is perinatal depression, and the third theme is perinatal health and well-being. These included studies are detailed below, and all non-UK prices have been converted to pound sterling currency and inflated to the latest available prices [46–50].

### Summary of studies including perinatal anxiety

This review found one study focussing on perinatal anxiety [17,35]. This study focusing on perinatal anxiety was an economic evaluation that consisted of a cost-effectiveness and cost-utility analysis of the What Were We Thinking (WWWT) intervention which was conducted alongside a cluster-randomised controlled trial [35]. WWWT is a psychoeducational intervention targeted at the partner relationship, management of infant behaviour and parental fatigue for the prevention of postnatal maternal mental health problems (See Table 3 for further details). There were no statistically significant differences in either costs or effectiveness. Limitations of the study included a short time-horizon (6 months), and there was no extrapolation beyond the time horizon as there were no significant differences in the period. Also, only costs for mothers and infants were collected, and costs and outcomes for partners were not, despite knowledge that health problems in couples tend to co-occur.

### Summary of studies including perinatal depression

This review found fifteen studies focussing on perinatal depression [3,4,9,10,19,20,36–43,51]. A cross-sectional study from the USA conducted between 2006 and 2011 investigated the out-of-pocket expenses and insurer expenses of depressed mothers compared to non-depressed mothers [40]. Depressed mothers were more likely to incur insurer out-of-pocket expenses (£1,285 vs £853<sup>□□</sup>) and have higher insurer expenses (£10,485 vs £7,508<sup>□□</sup>). The main limitation of this study was that the data was self-reported and therefore subject to recall bias, and as a result, the true medical costs associated with depression in high-risk mothers may be under-reported.

A study by [9] used the perspective of the public sector, individuals, and society to examine some of the outcomes and long-term economic implications experienced by offspring who have been exposed to perinatal depression in a South London cohort. Bauer et al. (2015) found that for each child exposed to perinatal depression, public sector costs exceeded £3,380<sup>□</sup>, costs due to reduced earnings were £1,562<sup>□</sup>, and health-related quality of life loss was valued at £3760<sup>□</sup>. A major limitation is that the model estimates were derived from small samples. Also, only mother, and infant costs were collected and costs from other individuals (such as other family members) were not included.

A decision analytic model used a simulated cohort of 1,000 Medicaid-enrolled pregnant individuals to evaluate the health care costs for individuals receiving PND preventive intervention or not, for 1 to 5 years post-partum [42]. This study found that providing preventive interventions for PPD resulted in an estimated 5-year saving of £602<sup>□□</sup>. The main limitation of this paper is that the model used a series of assumptions which may not be applicable to a particular group of individuals receiving specific PPD prevention interventions.

Dagher et al., (2012) conducted a cross-sectional study in the USA which investigated expenditure on healthcare services from hospital discharge until 11 weeks postpartum. There was a significant difference in healthcare expenditure between depressed and non-depressed women. The Edinburgh Postnatal Depression Scale (EPDS) was used to measure depression [52]. The total cost of all

1  
2  
3 mental health counselling visits for the depressed group (n=31) was £165<sup>□□</sup>, and the  
4 cost for the non-depressed group (n= 607) was £15.50<sup>□□</sup> (in 2007). This was a  
5 statistically significant difference (p < 0.001). The main limitation was that the data  
6 was self-reported. Also, the cross-sectional nature of this study prohibited causal  
7 inferences.  
8  
9

10 Using a theoretical cohort of 180,000 individuals, a decision-analytic model using  
11 TreeAge Pro software was used to compare outcomes in pregnant adolescents who  
12 received versus did not receive counselling interventions [43]. This study found that it  
13 is cost-effective to refer all pregnant adolescents for preventive counselling  
14 interventions. Within the theoretical cohort for counselling, there were 8,935 fewer  
15 cases of PND, 1,606 fewer cases of chronic depression, 166 fewer preterm  
16 deliveries, four fewer neonatal deaths, 20 fewer cases of sudden infant death  
17 syndrome (SIDS), and one fewer case of cerebral palsy. In total, there were 21,976  
18 additional QALYs and cost savings of £183,463,169<sup>^</sup>, making it the dominant  
19 strategy that had better outcomes with lower costs. The main limitation of this  
20 modelling study was that the model did not include the entire social and economic  
21 costs of infant death, which is a large contributing factor to perinatal depression.  
22  
23  
24

25 An RCT trial compared a multicomponent collaborative care intervention for  
26 depression (MOMcare - a choice of brief interpersonal psychotherapy or  
27 pharmacotherapy or both) with enhanced maternity support services (MSS-Plus) in  
28 the public health system of Seattle, USA [37]. The incremental benefit and cost and  
29 the net benefit for women with major depression and PTSD were estimated. When  
30 controlled for baseline depression severity, women with probable depression and  
31 PTSD in MOMCare had 68 more depression-free days over 18 months than those in  
32 MSS-Plus (p<.05). There was an additional £1,943<sup>□□</sup> depression care cost per  
33 MOMCare participant with comorbid PTSD. The incremental net benefit of MOMCare  
34 was positive if depression free days were valued below £18<sup>□□</sup>. For women with  
35 probable major depression and PTSD, MOMCare had a significant clinical benefit  
36 over MSS-Plus, with only a moderate increase in health services cost. The main  
37 limitation was that self-report measures were used to estimate the costs of mental  
38 health services, and these may have been over-estimated.  
39  
40  
41

42 A cluster RCT of health visitors trained to assess PND and deliver psychological  
43 approaches to women at risk of depression plus either a cognitive behavioural  
44 approach or a person-centred approach weekly for eight weeks was conducted in  
45 2019 [34]. A cost-effectiveness analysis was run parallel to this for all mothers at low  
46 risk of depression in accordance with the EPDS at six months postnatal. This study  
47 found that CBT had a marginally higher probability of being cost-effective than a  
48 person-centred approach. The main limitation was the short time horizon of 6 months  
49 postnatally which means that the risks of long-term adverse effects were not factored  
50 into the analysis.  
51  
52  
53

54 A cohort study with a sample size of 135,678 mother-child pairs with and without  
55 PND exposure revealed similar findings [10]. The results of this analysis suggest that  
56 the health resource utilisation and costs over the first 24 months of life in children of  
57 mothers with PND exceeded that of children of mothers without evidence of PND  
58 £22,940<sup>□□</sup> and £20,487<sup>□□</sup>, respectively. This was a significant difference of £2,453. A  
59 limitation of this study was that analysis was conducted on the commercially insured  
60

1  
2  
3 population; thus, the results of this analysis may not be generalisable to PND  
4 patients with other or no insurance, likely representing persons of higher socio-  
5 economic status.  
6  
7

8 A longitudinal study (18 months) conducted in 2002 estimated the economic costs of  
9 PND in a geographically defined cohort of women at high-risk of developing the  
10 condition with the use of an RCT to identify women considered to be of high-risk [38].  
11 Unit costs were applied to estimates of health and social care resource use made by  
12 206 women and their infants recruited from antenatal clinics, and net costs per  
13 mother-infant dyad over the first 18 months post-partum were estimated. This study  
14 found that costs were £587<sup>□</sup> higher for women with PND than for women without  
15 PND. Economic costs were also higher for women with extended experiences of the  
16 condition. Limitations of the study included the public sector approach that was  
17 taken. This did not allow measurement of non-medical costs such as travel and  
18 child-care costs.  
19  
20  
21

22 A cost-effectiveness analysis of preventive interventions, which consisted of  
23 counselling and support for the mother–infant relationship, targeted at women at  
24 high-risk of developing PND, was conducted in 2006 [3]. This study found that given  
25 the negative impact of PND on later child development, preventive interventions are  
26 likely to be cost-effective even at relatively low willingness to pay thresholds for  
27 preventing one month of PND during the first 18 months post-partum. The mean  
28 health and social care costs were estimated at £3,345<sup>□</sup> per mother–infant dyad in the  
29 preventive intervention group and £3,277<sup>□</sup> per mother–infant dyad in the routine  
30 primary care group, providing a mean cost difference of £166<sup>□</sup>. The main limitations  
31 of this cost-effectiveness study were that the numbers in the intervention and control  
32 groups were relatively low (74 and 77 respectively). Also, the time horizon of 18  
33 months was likely to underestimate the long-term effectiveness of the prevention  
34 intervention.  
35  
36  
37

38 A cross-sectional study of 1,250 mothers of infants in a Canadian setting used the  
39 EPDS to investigate the costs associated with perinatal depression [41]. It was found  
40 that costs were notably different for mothers with and without depression. The total  
41 cost for health and social care was £833<sup>□□</sup> for mothers with depression and their  
42 infants, compared to £406<sup>□□</sup> for those with lower depression scores. This was  
43 statistically a significant difference at  $p < .01$ . The main limitation of this study was  
44 that only subjective measurements were used, which depended on phone calls to  
45 mothers about health and social service use in the past four weeks. The mothers  
46 may have overestimated their service use.  
47  
48  
49

50 An economic evaluation conducted in 2010 compared the cost-effectiveness of  
51 group Cognitive Behavioural Therapy (gCBT) compared with routine primary care for  
52 women with PND in the UK [36]. This economic evaluation found that gCBT does not  
53 appear to be cost-effective due to the lack of literature providing robust information.  
54 Only one study, an RCT, was deemed applicable to the decision problem. However,  
55 there was no data available comparing gCBT with CBT which is a limitation of this  
56 study. Additionally, there is a possibility that the results are influenced by the  
57 therapist due to the small number of participants and clinicians.  
58  
59  
60

1  
2  
3 A cost-effectiveness analysis found that screening for and treating post-partum  
4 depression is a cost-effective intervention and should be considered as a part of  
5 usual postnatal care [4]. This study followed a hypothetical cohort of 1,000 pregnant  
6 women experiencing one live birth over a 2-year time horizon. The analysis found  
7 that screening for and treating PND and psychosis produced 29 more healthy  
8 women at the cost of £938<sup>□</sup> per woman. The incremental cost-effectiveness ratios  
9 (ICERs) of the intervention branch compared to usual care were £13,702<sup>□</sup> per  
10 quality-adjusted life year (QALY) gained (below the commonly accepted willingness  
11 to pay threshold of \$50,000/QALY gained) and \$10,182 per remission achieved. The  
12 main limitation of this study is that due to the lack of data on other adverse events,  
13 this study only considered suicide ideation within its analysis. Therefore, there is a  
14 possibility that other adverse events may significantly decrease the cost-  
15 effectiveness of the intervention. Moreover, some adverse events may increase the  
16 cost-effectiveness of the intervention, for example, the long-term effects of untreated  
17 PND.  
18  
19  
20  
21

### 22 Summary of studies including maternal health and well-being

23 This review found four studies relating to the health and well-being of perinatal  
24 women [18,33,44,45]. An RCT conducted in 2000 aimed to establish the relative  
25 cost-effectiveness of postnatal support in the community in addition to the usual care  
26 provided by the community midwives [33]. Three hundred and eleven women were  
27 allocated to the intervention of up to ten home visits by a community postnatal  
28 support worker. The authors found no health benefit of additional home visits by  
29 community postnatal support workers compared with traditional community midwifery  
30 visiting, as measured by the Short Form 36 measure. At six months, there was no  
31 significant improvement in health status among the women in the intervention group  
32 despite there being a significant difference in costs of £1,250<sup>□</sup> (intervention group)  
33 and £980<sup>□</sup> (usual care group), ( $P = 0.001$ ). Although there were no savings to the  
34 NHS over six months after the introduction of the community postnatal support  
35 worker service, the women in the intervention group were very satisfied with the  
36 support worker visits. A major limitation of the findings is that the time horizon was  
37 only six weeks, and wider public health implications were not explored.  
38  
39  
40

41 Authors have suggested that prenatal interventions that do not seem cost-effective in  
42 the short term may be cost-effective over a longer time horizon [53]. Ride (2018)  
43 conducted a decision analytic modelling study and noted that it is important to  
44 consider caregiving and family health effects in the outcomes of maternal health  
45 studies. By not including broader sets of costs and outcomes, resources in postnatal  
46 mental health may be misallocated. As a result, some women may not benefit as  
47 much from interventions that might be cost-effective given a broader time horizon.  
48 Ride (2018) noted that the uncertainty surrounding the results in the decision analytic  
49 model may reflect decisions and investment in PND interventions.  
50  
51  
52

53 A modelling study from Australia, published in 2019, utilised cohort data from 1921 to  
54 1995 and found that the healthcare costs for postnatal women who had poor mental  
55 health prior to birth were £1,066<sup>^</sup> [45]. This is, on average, 11% more than for  
56 mothers with no previous history of poor mental health. These figures do not include  
57 out-of-pocket expenditure for the women who may have also purchased their own  
58 over-the-counter medications and had other patient expenses which were not  
59 captured in the analysis.  
60

## Discussion

The aim of this rapid review was to investigate the type of health economic evaluations of preventative care for perinatal anxiety and associated disorders carried out within the National Health Service (NHS) and similar healthcare systems. Twenty-one papers were included in this review from Australia, Canada, Ireland, the USA, and the UK, each examining maternal mental health.

The results indicate a lack of economic evaluation specifically for perinatal anxiety, with most study articles focusing on PND [36]. Only two included papers focussed on anxiety, with one being a systematic review looking at anxiety alongside depression [17]. The other was an economic evaluation of a maternal mental health intervention. Treatments for maternal mental health in the WWWT intervention consisted of health visitors with psychiatric training and group sessions focusing on parenting confidence and emotional well-being with online and face-to-face components [35]. The WWWT intervention shows promise as a preventive intervention. However, there is uncertainty as to its cost-effectiveness. However, there is uncertainty as to its cost-effectiveness. The analysis showed no statistically significant difference in costs or outcomes between the intervention and control groups, with the intervention estimated to cost £74.48 per participant.

Most of the studies included (n=15 of the 17 included studies) focussed on the cost of services and interventions for PND. The evidence suggests significant health resource costs outside of mental health services as well as social care costs for PND for mother and mother-infant dyad. Costs were significantly higher for children of mothers with PND than for children of mothers without PND. This was a statistically significant difference of £2,453 (p <.001) [10].

Significantly, counselling was found to be a cost-effective, preventative intervention for high-risk groups such as pregnant adolescents [43]. Using a hypothetical cohort, a found that counselling was a cost-effective preventative measure, leading to fewer cases of perinatal and chronic depression [43]. Another study estimated that group counselling (costing £114 per mother) cost around £73<sup>□</sup> less than individual counselling (£187 per mother) for mothers with PND [42]. This study found that screening for PND costs less than £2 per mother [42]. Studies that combined screening for PND with an intervention were also found to be cost-effective, resulting in 29 more healthy women at a cost of £938<sup>□□</sup> per woman [4]. The incremental cost-effectiveness ratios of the intervention branch compared to usual care were \$13,857 per QALY gained (below the commonly accepted willingness to pay threshold of \$50,000/QALY gained) and \$10,182 per remission achieved.

Within this rapid review, the EPDS, a validated measure for postnatal depression and anxiety [52], was the most frequently used instrument to detect perinatal and PND in the included studies, followed by the SF-36 scale, postal questionnaires such as the Ontario health survey, Health and Social Service Utilisation Questionnaire (HSUQ), blinded telephone assessments and medical records, Medicaid data,



1  
2  
3 resource use logs completed by health visitors based on GP records, and  
4 prospective diaries and face-to-face interviews.  
5

6 In summary, screening was found to be a relatively low-cost method of identifying  
7 women in need of mental health support during the perinatal period. Interventions to  
8 prevent postnatal mental health problems were found to be cost-effective [35]. Also,  
9 two modelling studies found that treating PND with counselling would be cost-  
10 effective [4,36].  
11  
12

13 Future research in this area should investigate how best to screen all mothers to  
14 prevent and treat further adverse outcomes such as anxiety, OCD, or PTSD [2].  
15 Various psycho-social methods could be used to screen and provide treatment over  
16 the telephone, online or face-to-face. Interventions could be provided by a range of  
17 healthcare professionals, such as midwives, health visitors, counsellors,  
18 psychologists, and psychiatrists. The effectiveness and cost-effectiveness of each  
19 intervention, including screening, should be evaluated.  
20  
21

22 Web-based approaches are already promising to be cost-effective solutions to  
23 support mothers in the perinatal period. Most women of childbearing age, including  
24 women who reside in rural areas, now have access to the internet in the UK and  
25 similar health care systems. There is concern regarding web-based interventions.  
26 For example, the lack of engagement could lead to significant dropout [54]. Being  
27 able to access support and treatment using online resources has widened access to  
28 care to postnatal care support. A recent cost-effectiveness study alongside an RCT  
29 in Singapore evaluated a web-based approach for delivering a psychoeducational  
30 intervention [14]. This web-based approach was cost-effective in supporting first-time  
31 mothers and provided the best improvements in self-efficacy, social support, and  
32 psychological well-being of mothers in the perinatal period.  
33  
34  
35  
36

37 The MAP ALLIANCE study is funded by the NIHR (Award ID: NIHR133727) and is a  
38 UK based project which aims to examine the care offered and accessed by women  
39 experiencing perinatal anxiety and associated disorders. This study includes an  
40 economic component to evaluate the cost-of-service use for perinatal anxiety and  
41 associated disorders. It is anticipated that the MAP ALLIANCE study will lead to  
42 recommendations for accessible, integrated care acceptable to women. It will assist  
43 NHS commissioners and providers in designing and transforming services for  
44 perinatal women. This will increase the chances for women to receive better care to  
45 improve maternal and child outcomes [55].  
46  
47  
48

## 49 Conclusion

50 This RR demonstrated that very few economic evaluations have focussed on  
51 perinatal anxiety, and those which reported on cost of perinatal depression had short  
52 time horizons which did not allow for long-term outcomes for the mother and child  
53 dyad to be addressed. However, there was some evidence that preventative  
54 measures, such as postnatal depression screening, combined with treatment, such  
55 as counselling for maternal mental health, are proven to be effective interventions to  
56 improve outcomes for women and children.  
57  
58  
59  
60

## Recommendations

It is recommended that:

- Mothers should be screened for maternal mental health issues to identify mothers at risk and provide treatment, leading to better outcomes for the mother and child dyad.
- Studies focussing on interventions for perinatal anxiety as a distinct condition to other mental health issues such as depression should be conducted.
- Cost of intervention studies related to perinatal anxiety should be conducted.

**Acknowledgements:** The authors thank the wider MAP ALLIANCE team from City University of London and the University of Stirling for input into the development of this review. We would also like to thank Yasmine Noorani, Academic Support Librarian at Bangor University, for her assistance in creating our search strategy. Additional thanks to Dr Catherine Lawrence for early input and feedback on this paper.

**Contributors:** The review was conceived by RTE, and the protocol was developed by LT, KP and LHS; searches were undertaken by KP; article screening was carried out by KP and LHS with mediation by LT; quality appraisal was undertaken by KP, LHS and LT; data were interpreted by all authors; the manuscript was drafted by KP and LHS and critically reviewed by all authors, RC, SA and RTE.

**Funding:** This review is to complement the MAP ALLIANCE study, funded by the National Institute for Health and Care Research (NIHR) (Award ID: NIHR133727). This rapid review was partially funded by Health and Care Economics Cymru (HCEC), an organisation funded by Health and Care Research Wales.

**Conflict of interest:** All authors declare that they have no conflicts of interest.

**Ethical approval:** The MAP ALLIANCE study received ethical approval from the West of Scotland Research Ethics Committee on 6<sup>th</sup> May 2022 (REC 3. Reference: 22/WS/0029).

**Data statement:** No datasets were generated and/or analysed for this study

## References

- [1] NHS England and NHS Improvement. The Perinatal Mental Health Care Pathways NHS England and NHS Improvement. 2018.
- [2] Bauer A, Personage M, Knapp M, Lemmi V, Adeleja B. Costs of perinatal mental health problems. London: 2014.
- [3] Petrou S, Cooper P, Murray L, Davidson LL, Lawson C, Woolgar M, et al. Cost-effectiveness of a preventive counseling and support package for postnatal depression. *Int J Technol Assess Health Care* 2006;22:443–53. <https://doi.org/10.1017/S0266462306051361>.
- [4] Wilkinson A, Anderson S, Wheeler SB. Screening for and Treating Postpartum Depression and Psychosis: A Cost-Effectiveness Analysis. *Matern Child Health J* 2017;21:903–14. <https://doi.org/10.1007/s10995-016-2192-9>.
- [5] Howard LM, Flach C, Mehay A, Sharp D, Tylee A. The prevalence of suicidal ideation identified by the Edinburgh Postnatal Depression Scale in postpartum women in primary care: Findings from the RESPOND trial. *BMC Pregnancy Childbirth* 2011;11. <https://doi.org/10.1186/1471-2393-11-57>.
- [6] Maternal Mental Health Alliance. Map of Specialist Community Perinatal Mental Health Teams (UK). 2020.
- [7] Kotlar B, Gerson E, Petrillo S, Langer A, Tiemeier H. The impact of the COVID-19 pandemic on maternal and perinatal health: a scoping review. *Reprod Health* 2021;18. <https://doi.org/10.1186/S12978-021-01070-6>.
- [8] Pilav S, Easter A, Silverio SA, de Backer K, Sundaresh S, Roberts S, et al. Experiences of Perinatal Mental Health Care among Minority Ethnic Women during the COVID-19 Pandemic in London: A Qualitative Study. *Int J Environ Res Public Health* 2022;19. <https://doi.org/10.3390/IJERPH19041975>.
- [9] Bauer A, Pawlby S, Plant DT, King D, Pariante CM, Knapp M. Perinatal depression and child development: Exploring the economic consequences from a South London cohort. *Psychol Med* 2015;45:51–61. <https://doi.org/10.1017/S0033291714001044>.
- [10] Moore Simas TA, Huang MY, Packnett ER, Zimmerman NM, Moynihan M, Eldar-Lissai A. Matched cohort study of healthcare resource utilization and costs in young children of mothers with postpartum depression in the United States. *J Med Econ* 2020;23:174–83. <https://doi.org/10.1080/13696998.2019.1679157>.
- [11] Giallo R, Woolhouse H, Gartland D, Hiscock H, Brown S. The emotional–behavioural functioning of children exposed to maternal depressive symptoms across pregnancy and early childhood: a prospective Australian pregnancy cohort study. *Eur Child Adolesc Psychiatry* 2015;24:1233–44. <https://doi.org/10.1007/s00787-014-0672-2>.

- 1  
2  
3 [12] Hardcastle K, Bellis MA, Ford K, Hughes K, Garner J, Ramos Rodriguez G.  
4 Measuring the relationships between adverse childhood experiences and  
5 educational and employment success in England and Wales: findings from a  
6 retrospective study. *Public Health* 2018;165:106–16.  
7 <https://doi.org/10.1016/J.PUHE.2018.09.014>.  
8  
9  
10 [13] Posmontier B, Neugebauer R, Stuart S, Chittams J, Shaughnessy R.  
11 Telephone-Administered Interpersonal Psychotherapy by Nurse-Midwives for  
12 Postpartum Depression. *J Midwifery Womens Health* 2016;61:456–66.  
13 <https://doi.org/10.1111/jmwh.12411>.  
14  
15 [14] Zheng Q, Shi L, Zhu L, Jiao N, Chong YS, Chan SWC, et al. Cost-  
16 effectiveness of Web-Based and Home-Based Postnatal Psychoeducational  
17 Interventions for First-time Mothers: Economic Evaluation Alongside  
18 Randomized Controlled Trial. *J Med Internet Res* 2022;24.  
19 <https://doi.org/10.2196/25821>.  
20  
21 [15] The National Institute of Health and Care Excellence. NICE | The National  
22 Institute for Health and Care Excellence 2022. <https://www.nice.org.uk/>  
23 (accessed February 9, 2022).  
24  
25 [16] National Institute for Health and Care Excellence. Maternity and mental health  
26 2022. [https://www.nice.org.uk/about/what-we-do/into-practice/measuring-the-  
27 use-of-nice-guidance/impact-of-our-guidance/niceimpact-maternity/ch2-  
28 maternity-and-mental-health](https://www.nice.org.uk/about/what-we-do/into-practice/measuring-the-use-of-nice-guidance/impact-of-our-guidance/niceimpact-maternity/ch2-maternity-and-mental-health) (accessed July 27, 2022).  
29  
30 [17] Camacho EM, Shields GE. Cost-effectiveness of interventions for perinatal  
31 anxiety and/or depression: A systematic review. *BMJ Open* 2018;8.  
32 <https://doi.org/10.1136/bmjopen-2018-022022>.  
33  
34 [18] Moran PS, Wuytack F, Turner M, Normand C, Brown S, Begley C, et al.  
35 Economic burden of maternal morbidity – A systematic review of cost-of-illness  
36 studies. *PLoS One* 2020;15.  
37 <https://doi.org/10.1371/JOURNAL.PONE.0227377>.  
38  
39 [19] Gurung B, Jackson LJ, Monahan M, Butterworth R, Roberts TE. Identifying  
40 and assessing the benefits of interventions for postnatal depression: A  
41 systematic review of economic evaluations. *BMC Pregnancy Childbirth*  
42 2018;18. <https://doi.org/10.1186/S12884-018-1738-9>.  
43  
44 [20] Morrell CJ, Sutcliffe P, Booth A, Stevens J, Scope A, Stevenson M, et al. A  
45 systematic review, evidence synthesis and meta-analysis of quantitative and  
46 qualitative studies evaluating the clinical effectiveness, the cost-effectiveness,  
47 safety and acceptability of interventions to prevent postnatal depression.  
48 *Health Technol Assess* 2016;20:1–414. <https://doi.org/10.3310/HTA20370>.  
49  
50 [21] Spencer LH, Pisavadia K, Tuersley L, Edwards RT. A structured review of the  
51 costs and services for perinatal anxiety and associated disorders: MAP  
52 ALLIANCE. PROSPERO 2022 CRD42022347859. PROSPERO 2022.  
53  
54  
55  
56  
57  
58  
59  
60

- 1  
2  
3 [22] Page M, McKenzie J, Bossuyt P, Boutron I, Hoffmann T, Mulrow C. The  
4 PRISMA 2020 statement: an updated guideline for reporting systematic  
5 reviews. *BMJ* 2021;10. <https://doi.org/doi.org/10.1186/s13643-021-01626-4>.  
6  
7 [23] Health and Care Research Wales. Impact of the COVID-19 pandemic on the  
8 health and access to health care of disabled people: a rapid review 2022.  
9 [https://healthandcareresearchwales.org/impact-covid-19-pandemic-disabled-](https://healthandcareresearchwales.org/impact-covid-19-pandemic-disabled-people)  
10 [people](https://healthandcareresearchwales.org/impact-covid-19-pandemic-disabled-people) (accessed May 10, 2022).  
11  
12 [24] Health and Care Research Wales. Modelling studies used to evaluate the  
13 effect of population-level non-pharmaceutical interventions on the reproduction  
14 number of Severe Acute Respiratory Syndrome Coronavirus 2 (SARS-CoV-2)  
15 2022. [https://healthandcareresearchwales.org/modelling-studies-used-](https://healthandcareresearchwales.org/modelling-studies-used-evaluate-effect-population-level-non-pharmaceutical-interventions)  
16 [evaluate-effect-population-level-non-pharmaceutical-interventions](https://healthandcareresearchwales.org/modelling-studies-used-evaluate-effect-population-level-non-pharmaceutical-interventions) (accessed  
17 May 10, 2022).  
18  
19 [25] Tricco AC, Khalil H, Holly C, Feyissa G, Godfrey C, Evans C, et al. Rapid  
20 reviews and the methodological rigor of evidence synthesis. *JBIEvid Synth*  
21 2022; Publish Ah:944–9. <https://doi.org/10.11124/jbies-21-00371>.  
22  
23 [26] Mandrik O, Severens J, Bardach A, Ghabri S, Hamel C, Mathes T, et al.  
24 Critical Appraisal of Systematic Reviews With Costs and Cost-Effectiveness  
25 Outcomes: An ISPOR Good Practices Task Force Report 2021.  
26 <https://doi.org/10.1016/j>.  
27  
28 [27] Schardt C, Adams MB, Owens T, Keitz S, Fontelo P. Utilization of the PICO  
29 framework to improve searching PubMed for clinical questions. *BMC Med*  
30 *Inform Decis Mak* 2007;7:1–6.  
31  
32 [28] Drummond MF, Sculpher MJ, Claxton K, Stoddart GL, Torrance G W. *Methods*  
33 *for the economic evaluation of health care programmes*. 4th ed. Oxford: Oxford  
34 University Press; 2015.  
35  
36 [29] Moons KGM, de Groot JAH, Bouwmeester W, Vergouwe Y, Mallett S, Altman  
37 DG, et al. Critical Appraisal and Data Extraction for Systematic Reviews of  
38 Prediction Modelling Studies: The CHARMS Checklist. *PLoS Med* 2014;11.  
39 <https://doi.org/10.1371/journal.pmed.1001744>.  
40  
41 [30] Aromataris E, Fernandez R, Godfrey C, Holly C, Kahlil H, Tungpunkom P.  
42 Summarizing systematic reviews: methodological development, conduct and  
43 reporting of an Umbrella review approach. *Int J Evid Based Healthc* 2015  
44 2015;13:132–40.  
45  
46 [31] Tufanaru C, Munn Z, Aromataris E, Campbell J, Hopp L. Systematic reviews of  
47 effectiveness. In: Aromataris E, Munn Z, editors. *JBIE Manual for Evidence*  
48 *Synthesis*, JBI; 2020.  
49  
50 [32] Moola S, Munn Z, Tufanaru C, Aromataris E, Sears K, Sfetcu R, et al.  
51 Systematic reviews of etiology and risk. In: Aromataris E, Munn Z, editors.  
52 *Manual for Evidence Synthesis*, JBI; 2020.  
53  
54  
55  
56  
57  
58  
59  
60

- 1  
2  
3 [33] Morrell CJ, Spiby H, Stewart P, Walters S, Morgan A. Costs and effectiveness  
4 of community postnatal support workers: Randomised controlled trial. *Br Med J*  
5 2000;321:593–8. <https://doi.org/10.1136/BMJ.321.7261.593>.  
6  
7 [34] Henderson C, Dixon S, Bauer A, Knapp M, Jane Morrell C, Slade P, et al.  
8 Cost-effectiveness of PoNDER health visitor training for mothers at lower risk  
9 of depression: Findings on prevention of postnatal depression from a cluster-  
10 randomised controlled trial. *Psychol Med* 2019;49:1324–34.  
11 <https://doi.org/10.1017/S0033291718001940>.  
12  
13 [35] Ride J, Lorgelly P, Tran T, Wynter K, Rowe H, Fisher J. Preventing postnatal  
14 maternal mental health problems using a psychoeducational intervention: the  
15 cost-effectiveness of What Were We Thinking. *BMJ Open* 2016;6.  
16 <https://doi.org/10.1136/bmjopen-2016>.  
17  
18 [36] Stevenson MD, Scope A, Sutcliffe PA. The Cost-Effectiveness of Group  
19 Cognitive Behavioral Therapy Compared with Routine Primary Care for  
20 Women with Postnatal Depression in the UK. *Value in Health* 2010;13:580–4.  
21 <https://doi.org/10.1111/j.1524-4733.2010.00720.x>.  
22  
23 [37] Grote NK, Simon GE, Russo J, Lohr MJ, Carson K, Katon W. Incremental  
24 benefit-cost of MOMCare: Collaborative care for perinatal depression among  
25 economically disadvantaged women. *Psychiatric Services* 2017;68:1164–71.  
26 <https://doi.org/10.1176/APPI.PS.201600411>.  
27  
28 [38] Petrou S, Cooper P, Murray L, Davidson LL. Economic costs of post-natal  
29 depression in a high-risk British cohort. *British Journal of Psychiatry*  
30 2002;181:505–12. <https://doi.org/10.1192/bjp.181.6.505>.  
31  
32 [39] Dagher RK, McGovern PM, Dowd BE, Gjerdingen DK. Postpartum depression  
33 and health services expenditures among employed women. *J Occup Environ*  
34 *Med* 2012;54:210–5. <https://doi.org/10.1097/JOM.0B013E31823FDF85>.  
35  
36 [40] Ammerman RT, Chen J, Mallow PJ, Rizzo JA, Folger AT, Van Ginkel JB.  
37 Annual direct health care expenditures and employee absenteeism costs in  
38 high-risk, low-income mothers with major depression. *J Affect Disord*  
39 2016;190:386–94. <https://doi.org/10.1016/J.JAD.2015.10.025>.  
40  
41 [41] Roberts J, Sword W, Watt S, Gafni A, Krueger P, Sheehan D, et al. Costs of  
42 postpartum care examining associations from the Ontario mother and infant  
43 survey. *Canadian Journal of Nursing Research* 2001;33:19–34.  
44  
45 [42] Counts NZ, Kuklinski MR, Wong V, Feinberg ME, Creedon TB. Comparison of  
46 Estimated Incentives for Preventing Postpartum Depression in Value-Based  
47 Payment Models Using the Net Present Value of Care vs Total Cost of Care.  
48 *JAMA Netw Open* 2022;5:e229401.  
49 <https://doi.org/10.1001/JAMANETWORKOPEN.2022.9401>.  
50  
51 [43] Franta G, Hersh AR, Cirino NH, Caughey AB. Prevention of perinatal  
52 depression with counseling in adolescents: a cost-effectiveness analysis. *The*  
53 *Journal of Maternal-Fetal & Neonatal Medicine: The Official Journal of the*  
54  
55  
56  
57  
58  
59  
60

- 1  
2  
3 European Association of Perinatal Medicine 2022.  
4 <https://doi.org/10.1080/14767058.2022.2049746>.  
5
- 6 [44] Ride J. Setting the Boundaries for Economic Evaluation: Investigating Time  
7 Horizon and Family Effects in the Case of Postnatal Depression. *Value in*  
8 *Health* 2018;21:573–80. <https://doi.org/10.1016/j.jval.2017.10.016>.  
9
- 10 [45] Chojenta C, William J, Martin MA, Byles J, Loxton D. The impact of a history of  
11 poor mental health on health care costs in the perinatal period. *Arch Womens*  
12 *Ment Health* 2019;22:467–73. <https://doi.org/10.1007/S00737-018-0912-4>.  
13  
14
- 15 [46] Bank of England. Inflation calculator 2022.  
16 <https://www.bankofengland.co.uk/monetary-policy/inflation/inflation-calculator>  
17 (accessed August 18, 2022).  
18
- 19 [47] U.S. Bureau of Labor Statistics. CPI Inflation Calculator 2022.  
20 [https://www.bls.gov/data/inflation\\_calculator.htm](https://www.bls.gov/data/inflation_calculator.htm) (accessed August 18, 2022).  
21  
22
- 23 [48] Google. Google currency converter 2022.  
24 [https://www.google.com/search?q=currency+converter&rlz=1C1GCEA\\_enGB991GB991&oq=currency+converter&aqs=chrome..69i57j0i10i131i433l2j0i10i7.4286j1j3&sourceid=chrome&ie=UTF-8](https://www.google.com/search?q=currency+converter&rlz=1C1GCEA_enGB991GB991&oq=currency+converter&aqs=chrome..69i57j0i10i131i433l2j0i10i7.4286j1j3&sourceid=chrome&ie=UTF-8) (accessed September 5, 2022).  
25  
26  
27
- 28 [49] Bank of Canada. Inflation Calculator 2022.  
29 <https://www.bankofcanada.ca/rates/related/inflation-calculator/> (accessed  
30 August 18, 2022).  
31  
32
- 33 [50] Reserve Bank of Australia 2022.  
34 <https://www.rba.gov.au/calculator/annualDecimal.html> (accessed March 29,  
35 2023).  
36
- 37 [51] Henderson J. The cost effectiveness of prenatal care - ProQuest 1994.  
38 <https://www.proquest.com/assia/docview/196971225/abstract/36297FA264EA438FPQ/1?accountid=14874> (accessed May 21, 2022).  
39  
40
- 41 [52] Cox JL, Chapman G, Murray D, Jones P. Validation of the Edinburgh postnatal  
42 depression scale ( EPDS) in non-postnatal women. vol. 39. 1996.  
43
- 44 [53] Ride J. Setting the Boundaries for Economic Evaluation: Investigating Time  
45 Horizon and Family Effects in the Case of Postnatal Depression 2018.  
46 <https://doi.org/10.1016/j.jval.2017.10.016>.  
47  
48
- 49 [54] Davis J, Ohan JL, Gibson LY, Prescott SL, Finlay-Jones AL. Understanding  
50 engagement in digital mental health and wellbeing programs for sub-clinical  
51 women in the perinatal period: A Systematic Review without Meta-Analysis  
52 (SWiM) (Preprint). *J Med Internet Res* 2022. <https://doi.org/10.2196/36620>.  
53
- 54 [55] Ayers S, Coates R, Sinesi A, Best C, Shakespeare J, Hollins K, et al.  
55 *OptiMising cAre for Perinatal Anxiety: evaluation of health service utilisAtioN,*  
56 *outComEs and costs (MAP ALLIANCE) - NIHR Funding and Awards. National*  
57 *Institute for Health and Care Research* 2022.  
58  
59  
60

1  
2  
3 <https://fundingawards.nihr.ac.uk/award/NIHR133727> (accessed August 16,  
4 2022).  
5  
6  
7  
8  
9  
10  
11  
12  
13  
14  
15  
16  
17  
18  
19  
20  
21  
22  
23  
24  
25  
26  
27  
28  
29  
30  
31  
32  
33  
34  
35  
36  
37  
38  
39  
40  
41  
42  
43  
44  
45  
46  
47  
48  
49  
50  
51  
52  
53  
54  
55  
56  
57  
58  
59  
60

For peer review only



1  
2  
3  
4  
5  
6  
7  
8  
9  
10  
11  
12  
13  
14  
15  
16  
17  
18  
19  
20  
21  
22  
23  
24  
25  
26  
27  
28  
29  
30  
31  
32  
33  
34  
35  
36  
37  
38  
39  
40  
41  
42  
43  
44  
45  
46

For peer review only

Figure 1. PRISMA study selection flowchart (Page et al., 2021b)

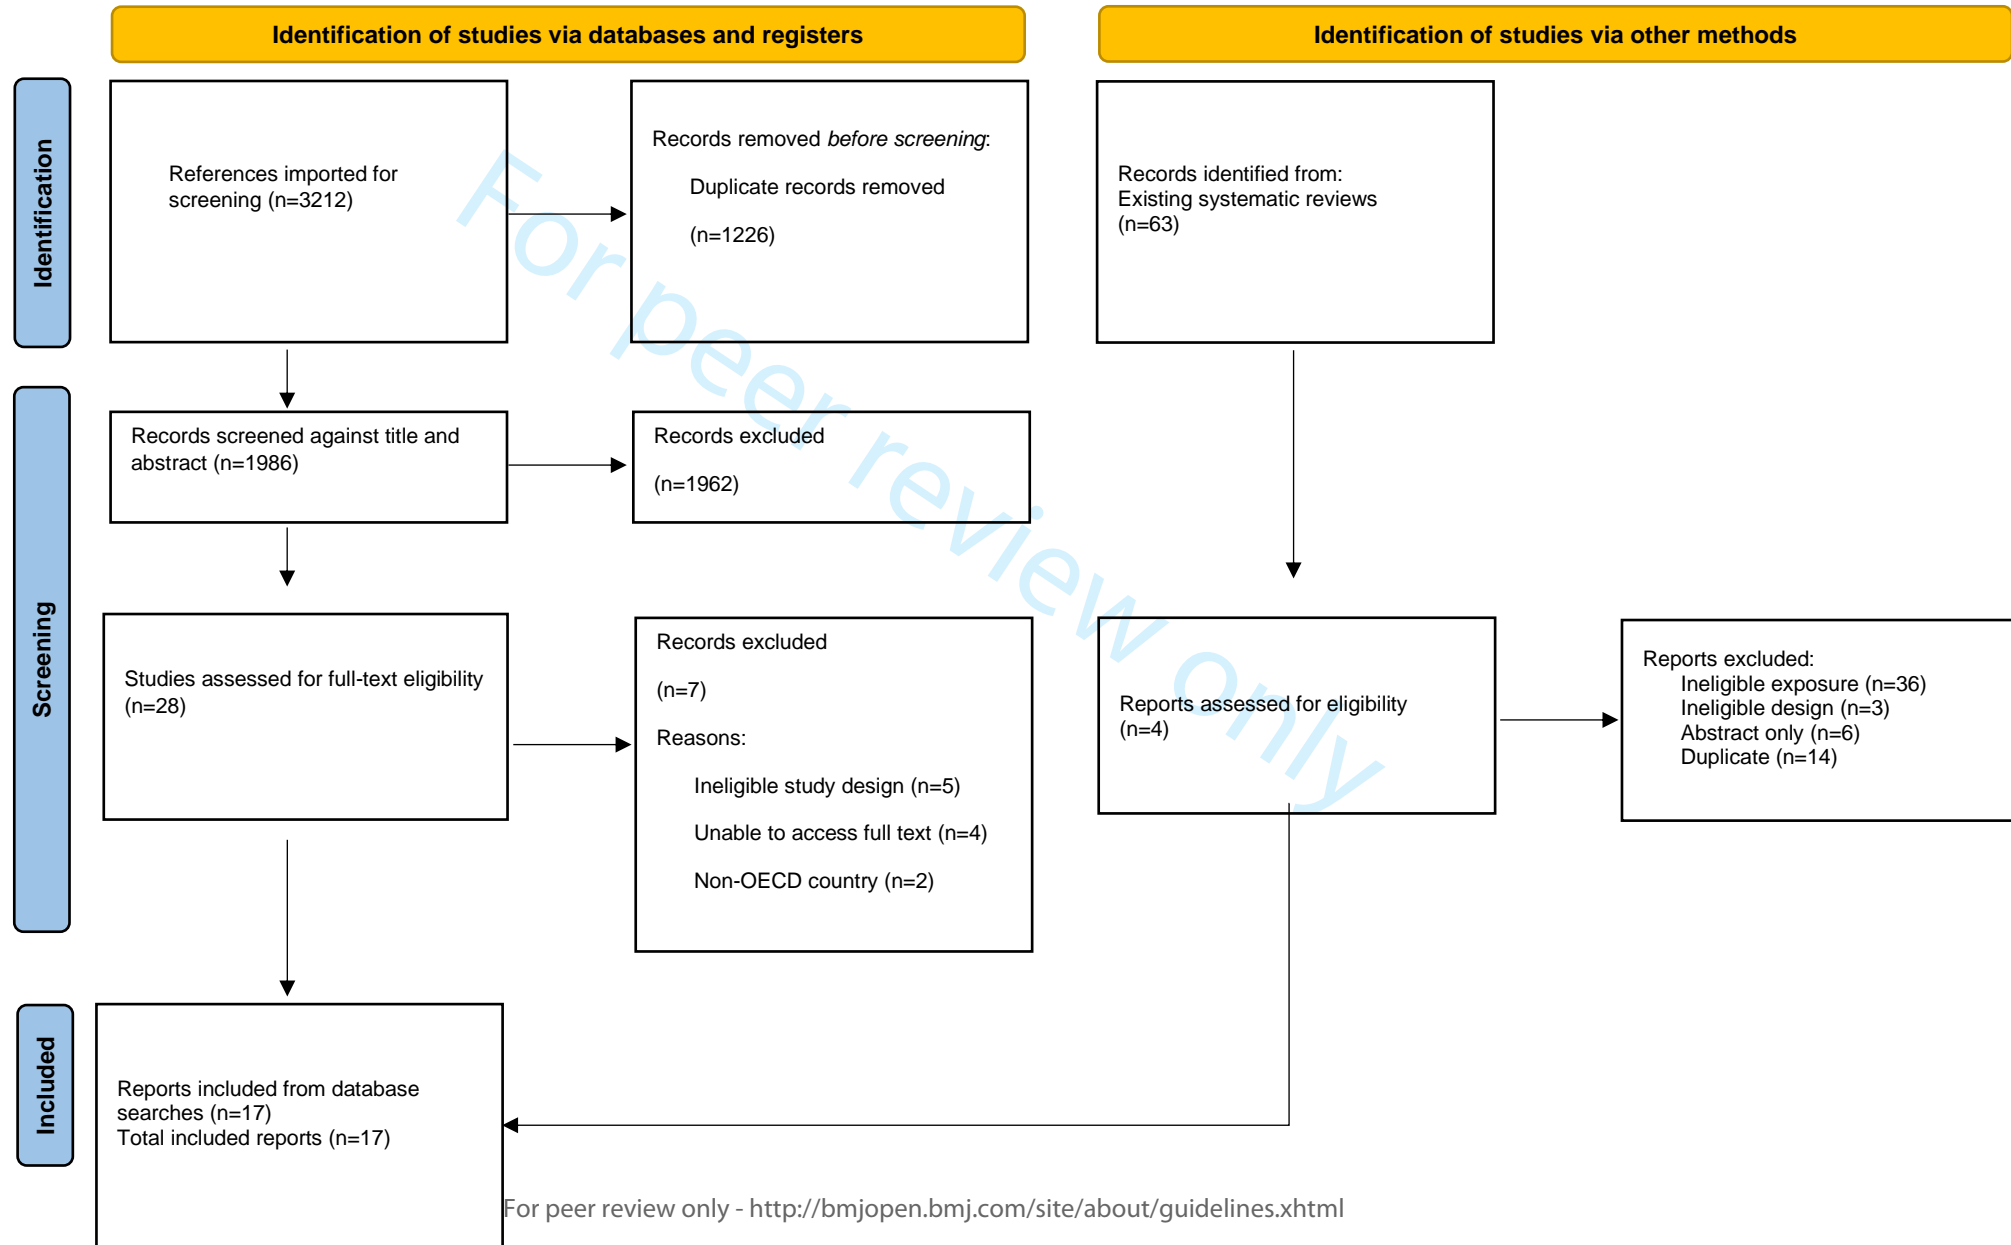

## Search strategy

Below is an example of a search strategy for the Medline database.

| ID | Search terms                                                                                                                                              |
|----|-----------------------------------------------------------------------------------------------------------------------------------------------------------|
| 1  | exp Pregnancy/                                                                                                                                            |
| 2  | (pregnan* or childbearing).ti,ab,kw.                                                                                                                      |
| 3  | (postpartum or post-partum or postnatal or postnatal or perinatal or peri-natal or prenatal or pre-natal or antenatal or ante-natal or matern*).ti,ab,kw. |
| 4  | perinatal anxiety.ti,ab,kw. or exp Perinatal anxiety/                                                                                                     |
| 5  | exp Depression/                                                                                                                                           |
| 6  | depress\$.ti,ab,kw.                                                                                                                                       |
| 7  | 5 or 6                                                                                                                                                    |
| 8  | (Infant or baby or child).ti,ab,kw                                                                                                                        |
| 9  | (care* or treatment).ti,ab,kw                                                                                                                             |
| 10 | NHS.ti,ab,kw                                                                                                                                              |
| 11 | hospitali\$ation*.ti,ab,kw                                                                                                                                |
| 12 | exp Resource allocation/                                                                                                                                  |
| 13 | economic evaluation\$.ti,ab,kw.                                                                                                                           |
| 14 | (cost* or economic* or pharmacoeconomic*).ti.                                                                                                             |
| 15 | 13 or 14                                                                                                                                                  |
| 16 | exp "costs and cost analysis"/ or exp Health Care Costs/                                                                                                  |
| 17 | exp Cost-Benefit Analysis/                                                                                                                                |
| 18 | (cost* adj2 (effective* or utility* or benefit* or consequence* or minimi*)).ti,ab,kw.                                                                    |
| 19 | 16 or 17 or 18                                                                                                                                            |
| 20 | quality-adjusted life year\$.ti,ab,kw. or exp Quality-Adjusted Life Years/                                                                                |
| 21 | Or 7 and 15 and 19                                                                                                                                        |

## Quality appraisal of health economic evaluation studies [24]

| Drummond et al checklist 2015                                                                    | Petrou et al (2002) [40] | Petrou et al (2006) [4] | Ride et al (2016) [32] | Henderson et al (2019) [38] |
|--------------------------------------------------------------------------------------------------|--------------------------|-------------------------|------------------------|-----------------------------|
| 1. Was a well defined question posed in an answerable form?                                      | Yes                      | Yes                     | Yes                    | Yes                         |
| 2. Was a comprehensive description of the competing alternatives given?                          | n/a                      | n/a                     | Yes                    | Yes                         |
| 3. Was the effectiveness of the programs or services established?                                | n/a                      | n/a                     | Yes                    | Yes                         |
| 4. Were all the important and relevant costs and consequences for each alternative identified?   | n/a                      | n/a                     | Yes                    | Yes                         |
| 5. Were costs and consequences measured accurately in appropriate physical units?                | Yes                      | Yes                     | Yes                    | Yes                         |
| 6. Were costs and consequences valued credibly?                                                  | Yes                      | Yes                     | Yes                    | Yes                         |
| 7. Were costs and consequences adjusted for differential timing?                                 | n/a                      | n/a                     | No                     | No                          |
| 8. Was an incremental analysis of costs and consequences of alternatives performed?              | n/a                      | n/a                     | No                     | Yes                         |
| 9. Was allowance made for uncertainty in the estimates of costs and consequences?                | Yes                      | Yes                     | Yes                    | Yes                         |
| 10. Did the presentation and discussion of study results include all issues of concern to users? | Yes                      | Yes                     | Yes                    | Yes                         |

Source of checklist: Drummond, M. F., Sculpher, M. J., Claxton, K., Stoddart, G. L., & Torrance G W. (2015). *Methods for the economic evaluation of health care programmes* (4th ed.). Oxford: Oxford University Press.

## Quality appraisal of health economic modelling studies with CHARMS Checklist [25]

| Domain                            | Key items                                                                                 | Counts et al (2022) - [34] | Franta et al (2022) - (Franta et al., 2022) | Ride (2018) - [45] | Wilkins on et al (2017) - [5] | Bauer et al (2015) (Bauer et al, 2015) | Stevenson et al, (2010) [42] |
|-----------------------------------|-------------------------------------------------------------------------------------------|----------------------------|---------------------------------------------|--------------------|-------------------------------|----------------------------------------|------------------------------|
| <b>SOURCE OF DATA</b>             | Source of data (e.g., cohort, case-control, randomized trial participants).               | p.3                        | p.2                                         | p.575              | p.3                           | p.52                                   | p.581                        |
| <b>PARTICIPANTS</b>               | Participant eligibility and recruitment method (e.g., consecutive participants, location, | p.3                        | p.2                                         | p.575              | p.3                           | p.52                                   | p.581                        |
|                                   | Participant description                                                                   | p.3                        | p.2                                         | p.575              | p.3                           | p.52                                   | p.581                        |
|                                   | Details of treatments received, if                                                        | p.5                        | p.2                                         | p.575              | p.3                           | p.52                                   | N/A                          |
|                                   | Study dates                                                                               | p.4                        | p.2                                         | p.575              | p.3                           | p.52                                   | p.581                        |
| <b>OUTCOME(S) TO BE PREDICTED</b> | Definition and method for measurement of outcome                                          | p.4                        | p.2                                         | p.574              | p.4                           | p.53                                   | p.581-582                    |
|                                   | Was the same outcome definition (and method for measurement ) used in all                 | Yes p.5                    | p.2                                         | p.574              | p.4                           | p.53                                   | p.581-582                    |
|                                   | Type of outcome (e.g., single or combined                                                 | p.3                        | p.5                                         | p.574              | p.4                           | p.53                                   | p.581                        |
|                                   | Was the outcome assessed without knowledge of                                             | No                         | No                                          | No                 | No                            | No                                     | p.581                        |
|                                   | Were candidate predictors part of the outcome                                             | No                         | No                                          | No                 | No                            | No                                     | p.581                        |

|                                              |                                                                                                    |         |         |         |         |         |           |
|----------------------------------------------|----------------------------------------------------------------------------------------------------|---------|---------|---------|---------|---------|-----------|
|                                              | Time of outcome occurrence or summary of duration of follow-up                                     | p.5     | p.5     | p.578   | p.4     | p.52    | p.581     |
| <b>CANDIDATE PREDICTORS (OR INDEX TESTS)</b> | Number and type of predictors (e.g., demographics, patient history, physical examination,          | p.5     | p.5     | p.577   | p.6     | p.55    | p.582     |
|                                              | Definition and method for measurement of candidate predictors                                      | p.5     | p.5     | p.575   | p.6     | p.55    | p.580-582 |
|                                              | Timing of predictor measurement (e.g., at patient presentation, at diagnosis.                      | p.5     | p.5     | p.577   | p.6     | p.55    | p.581     |
|                                              | Were predictors assessed blinded for outcome, and for each other                                   | No      | No      | No      | No      | No      | p.582     |
|                                              | Handling of predictors in the modelling (e.g., continuous, linear, non-linear transformation       | Unclear | Unclear | Unclear | Unclear | p.52    | p.582     |
| <b>SAMPLE SIZE</b>                           | Number of participants and number of outcomes/ev                                                   | p.3     | p.2     | p.575   | P.3     | p.55    | p.582     |
|                                              | Number of outcomes/ev ents in relation to the number of candidate predictors (Events Per Variable) | p.5     | p.3     | p.577   | p.20    | p.57    | p.582     |
| <b>MISSING DATA</b>                          | Number of participants with any missing value                                                      | p.4     | Unclear | Unclear | Unclear | Unclear | Unclear   |

|                          |                                                                                                                                                                                                     |                                  |                        |                         |                        |                         |                    |
|--------------------------|-----------------------------------------------------------------------------------------------------------------------------------------------------------------------------------------------------|----------------------------------|------------------------|-------------------------|------------------------|-------------------------|--------------------|
|                          | Number of participants with missing data for each predictor                                                                                                                                         | Unclear                          | Unclear                | Unclear                 | Unclear                | Unclear                 | Unclear            |
|                          | Handling of missing data (e.g., complete-case analysis, imputation, or                                                                                                                              | Unclear                          | Unclear                | Unclear                 | Unclear                | Unclear                 | Unclear            |
| <b>MODEL DEVELOPMENT</b> | Modelling method (e.g., logistic, survival, neural network, or                                                                                                                                      | Simulated cohort model           | Simulated cohort model | Decision analytic model | Simulated cohort model | Decision analytic model | Mathematical model |
|                          | Modelling assumptions satisfied                                                                                                                                                                     | See Appendix 1 in the supplement | p.5                    | p.577                   | p.4                    | p.53                    | p.580              |
|                          | Method for selection of predictors <b>for inclusion</b> in multivariable modelling (e.g., all candidate predictors, pre-selection based on unadjusted association with the                          | Unclear                          | Unclear                | p.577                   | p.4                    | p.53                    | p.581              |
|                          | Method for selection of predictors <b>during multivariable modelling</b> (e.g., full model approach, backward or forward selection) and criteria used (e.g., p-value, Akaike Information Criterion) | Unclear                          | Unclear                | Unclear                 | Unclear                | p.53                    | Unclear            |

|                          |                                                                                                                                                                                                                      |                  |         |         |         |         |         |
|--------------------------|----------------------------------------------------------------------------------------------------------------------------------------------------------------------------------------------------------------------|------------------|---------|---------|---------|---------|---------|
|                          | Shrinkage of predictor weights or regression coefficients (e.g., no shrinkage,                                                                                                                                       | Unclear          | Unclear | Unclear | Unclear | Unclear | Unclear |
| <b>MODEL PERFORMANCE</b> | Calibration (calibration plot, calibration slope, Hosmer-Lemeshow test) and Discrimination (C-statistic, D-statistic, log-rank)                                                                                      | p.5              | Unclear | Unclear | Unclear | Unclear | Unclear |
|                          | Classification measures (e.g., sensitivity, specificity, predictive values, net reclassification improvement) and whether a-priori cut                                                                               | See e-appendix 3 | p.6     | p.577   | p.6     | No      | p.581   |
| <b>MODEL EVALUATION</b>  | Method used for testing model performance: development dataset only (random split of data, resampling methods e.g. bootstrap or cross-validation, none) or separate external validation (e.g. temporal, geographical | See e-appendix 3 | Unclear | Unclear | p.6     | No      | Unclear |



|                |                                                                                                                                                                                                            |         |         |         |         |    |         |
|----------------|------------------------------------------------------------------------------------------------------------------------------------------------------------------------------------------------------------|---------|---------|---------|---------|----|---------|
|                | In case of poor validation, whether model was adjusted or updated (e.g., intercept recalibrated, predictor effects)                                                                                        | Unclear | Unclear | Unclear | Unclear | No | Unclear |
|                | Final and other multivariable models (e.g., basic, extended, simplified) presented, including predictor weights or regression coefficients, intercept, baseline survival, model performance measures (with | Unclear | Unclear | Unclear | Unclear | No | No      |
| <b>RESULTS</b> | Any alternative presentation of the final prediction models, e.g., sum score, nomogram, score chart, predictions for specific risk subgroups                                                               | No      | No      | p.578   | p.23    | No | No      |
|                | Comparison of the distribution of predictors (including missing data) for development and validation                                                                                                       | No      | No      | No      | No      | No | No      |

|                                      |                                                                                                                            |     |     |       |     |      |       |
|--------------------------------------|----------------------------------------------------------------------------------------------------------------------------|-----|-----|-------|-----|------|-------|
| <b>INTERPRETATION AND DISCUSSION</b> | Interpretation of presented models (confirmatory, i.e., model useful for practice versus exploratory, i.e., more research) | p.7 | p.5 | p.577 | p.6 | p.56 | p.583 |
|                                      | Comparison with other studies, discussion of generalizability, strengths and limitations.                                  | p.7 | p.5 | p.577 | p.6 | p.58 | p.583 |

### JBI critical appraisal checklist for Systematic Reviews and Research Syntheses [26]

| Citation                  | Q1. Is the review question clearly and explicitly stated? | Q2. Were the inclusion criteria appropriate for the review question? | Q3. Was the search strategy appropriate? | Q4. Were the sources and resources used to search for studies adequate? | Q5. Were the criteria for appraising studies appropriate? | Q6. Was critical appraisal conducted by two or more reviewers independently? | Q7. Were there methods to minimize errors in data extraction? | Q8. Were the methods used to combine studies appropriate? | Q9. Was the likelihood of publication bias assessed? | Q10. Were recommendations for policy and/or practice supported by the reported data? | Q11. Were the specific directives for new research appropriate? |
|---------------------------|-----------------------------------------------------------|----------------------------------------------------------------------|------------------------------------------|-------------------------------------------------------------------------|-----------------------------------------------------------|------------------------------------------------------------------------------|---------------------------------------------------------------|-----------------------------------------------------------|------------------------------------------------------|--------------------------------------------------------------------------------------|-----------------------------------------------------------------|
| (Camacho & Shields, 2018) | Yes                                                       | Yes                                                                  | Yes                                      | Yes                                                                     | Yes                                                       | Unclear                                                                      | Yes                                                           | Yes                                                       | Yes                                                  | Yes                                                                                  | Yes                                                             |
| [37]                      | Yes                                                       | Yes                                                                  | Yes                                      | Yes                                                                     | Yes                                                       | Unclear                                                                      | Yes                                                           | Unclear                                                   | Yes                                                  | Yes                                                                                  | Yes                                                             |
| (Moran et al., 2020)      | Yes                                                       | Yes                                                                  | Yes                                      | Yes                                                                     | Yes                                                       | Yes                                                                          | Yes                                                           | Yes                                                       | Yes                                                  | Unclear                                                                              | Yes                                                             |
| (Morrell et al., 2016)    | Yes                                                       | Yes                                                                  | Yes                                      | Yes                                                                     | Yes                                                       | Yes                                                                          | Yes                                                           | Yes                                                       | Yes                                                  | Yes                                                                                  | Yes                                                             |

### JBI Critical appraisal checklist for randomized controlled trials [27]

| Citation | Q1. Was true randomization used for assignment of participants to treatment groups? | Q2. Was allocation to treatment groups concealed? | Q3. Were treatment groups similar at the baseline? | Q4. Were participants blind to treatment assignment? | Q5. Were those delivering treatments blind to treatment? | Q6. Were outcomes assessed by those blind to treatment? | Q7. Were treatment groups treated identically other than the intervention? | Q8. Was follow up complete and if not, were differences? | Q9. Were participants analyzed in the groups to which they were? | Q10. Were outcomes measured in the same way for | Q11. Were outcomes measured in a reliable way? | Q12. Was appropriate statistical analysis used? | Q13. Was the trial design appropriate, and any deviations from the standard |
|----------|-------------------------------------------------------------------------------------|---------------------------------------------------|----------------------------------------------------|------------------------------------------------------|----------------------------------------------------------|---------------------------------------------------------|----------------------------------------------------------------------------|----------------------------------------------------------|------------------------------------------------------------------|-------------------------------------------------|------------------------------------------------|-------------------------------------------------|-----------------------------------------------------------------------------|
|----------|-------------------------------------------------------------------------------------|---------------------------------------------------|----------------------------------------------------|------------------------------------------------------|----------------------------------------------------------|---------------------------------------------------------|----------------------------------------------------------------------------|----------------------------------------------------------|------------------------------------------------------------------|-------------------------------------------------|------------------------------------------------|-------------------------------------------------|-----------------------------------------------------------------------------|

|      |     |     |     |         |             |             |                           |                                                                               |             |                   |         |     |                                                                                                                |
|------|-----|-----|-----|---------|-------------|-------------|---------------------------|-------------------------------------------------------------------------------|-------------|-------------------|---------|-----|----------------------------------------------------------------------------------------------------------------|
|      |     |     |     |         | assignment? | assignment? | intervention of interest? | between groups in terms of their follow up adequately described and analyzed? | randomized? | treatment groups? |         |     | RCT design (individual randomization, parallel groups) accounted for in the conduct and analysis of the trial? |
| [29] | Yes | Yes | Yes | Unclear | Yes         | Unclear     | Yes                       | Yes                                                                           | No          | Yes               | Unclear | Yes | N/A                                                                                                            |
| [44] | Yes | Yes | Yes | Yes     | Yes         | Unclear     | Yes                       | Yes                                                                           | Yes         | Yes               | Yes     | Yes | Yes                                                                                                            |

### JBICritical Appraisal Checklist for Cohort Studies [28]

| Citation                   | Q1. Were the two groups similar and recruited from the same population? | Q2. Were the exposures measured similarly to assign people to both exposed and unexposed groups? | Q3. Was the exposure measured in a valid and reliable way? | Q4. Were confounding factors identified? | Q5. Were strategies to deal with confounding factors stated? | Q6. Were the groups/participants free of the outcome at the start of the study (or at the moment of exposure)? | Q7. Were the outcomes measured in a valid and reliable way? | Q8. Was the follow up time reported and sufficient to be long enough for outcomes to occur? | Q9. Was follow up complete, and if not, were the reasons to loss to follow up described and explored? | Q10. Were strategies to address incomplete follow up utilized? | Q11. Was appropriate statistical analysis used? |
|----------------------------|-------------------------------------------------------------------------|--------------------------------------------------------------------------------------------------|------------------------------------------------------------|------------------------------------------|--------------------------------------------------------------|----------------------------------------------------------------------------------------------------------------|-------------------------------------------------------------|---------------------------------------------------------------------------------------------|-------------------------------------------------------------------------------------------------------|----------------------------------------------------------------|-------------------------------------------------|
| (Moore Simas et al., 2020) | Yes                                                                     | Yes                                                                                              | Yes                                                        | No                                       | No                                                           | Yes                                                                                                            | Yes                                                         | Yes                                                                                         | Unclear                                                                                               | N/A                                                            | Yes                                             |

### JBICritical Appraisal Checklist for Cross-sectional studies [28]

| Citation              | Q1. Were the criteria for inclusion in the sample clearly defined? | Q2. Were the study subjects and the setting described in detail? | Q3. Was the exposure measured in a valid and reliable way? | Q4. Were objective, standard criteria used for measurement of the condition? | Q5. Were confounding factors identified? | Q6. Were strategies to deal with confounding factors stated? | Q7. Were the outcomes measured in a valid and reliable way? | Q8. Was appropriate statistical analysis used? |
|-----------------------|--------------------------------------------------------------------|------------------------------------------------------------------|------------------------------------------------------------|------------------------------------------------------------------------------|------------------------------------------|--------------------------------------------------------------|-------------------------------------------------------------|------------------------------------------------|
| Dagher et al., 2012   | Yes                                                                | Yes                                                              | Yes                                                        | Yes                                                                          | No                                       | No                                                           | Yes                                                         | Yes                                            |
| Chojenta et al., 2019 | Yes                                                                | Yes                                                              | Yes                                                        | Yes                                                                          | Yes                                      | Yes                                                          | Yes                                                         | Unclear                                        |
| Ammerman et al., 2016 | Yes                                                                | Yes                                                              | Yes                                                        | Yes                                                                          | Yes                                      | Yes                                                          | Yes                                                         | Yes                                            |
| Roberts et al., 2001  | Yes                                                                | Yes                                                              | Yes                                                        | Yes                                                                          | No                                       | N/A                                                          | Yes                                                         | Yes                                            |

## Abbreviations

| Abbreviation        | Full                                                                 | Aspect            |
|---------------------|----------------------------------------------------------------------|-------------------|
| ANOVA               | Analysis of Variance                                                 | Analysis          |
| ANRQ-R              | Antenatal Risk Questionnaire                                         | Tool              |
| CATi                | Computer Assisted Telephone Interviews                               | Research          |
| CBA                 | Cognitive Behavioural Approach                                       | Intervention      |
| CBT                 | Cognitive Behavioural Therapy                                        | Intervention      |
| CEA                 | Cost Effectiveness Analysis                                          | Analysis          |
| CIDI                | Composite International Diagnostic Interview                         | Research          |
| CUA                 | Cost Utility Analysis                                                | Analysis          |
| DASS21              | Depression, Anxiety and Stress Scale                                 | Tool              |
| DCS                 | Depression Care Specialist                                           | Staff             |
| DFD                 | Disease Free Day                                                     | Research          |
| DSM-IV              | Diagnostic and Statistical Manual for Mental Disorders 4th Edition   | Source            |
| eMBI                | electronic Mindfulness-based Intervention                            | Intervention      |
| EPDS                | Edinburgh Postnatal Depression Scale                                 | Tool              |
| ePRO                | electronic Patient Reported Outcomes                                 | Research          |
| EQ-5D-3L            | EuroQol 5 Dimension 3 Level                                          | Tool              |
| GP                  | General Practitioner                                                 | Staff             |
| gCBT                | Group cognitive behavioural therapy                                  | Intervention      |
| HRU                 | Healthcare resource utilization                                      | Analysis          |
| HV                  | Health Visitor                                                       | Staff             |
| ICD                 | International Classification of Diseases                             | Source            |
| ICER                | Incremental Cost-Effectiveness Ratio                                 | Analysis          |
| IG                  | Intervention Group                                                   | Research          |
| IPT                 | Interpersonal psychotherapy                                          | Intervention      |
| ITT                 | Intention to Treat                                                   | Research          |
| LGA                 | Local Government Area                                                | Organisation      |
| MBS                 | Medical Benefits Schedule                                            | Source            |
| MCH                 | Maternal and Child Health                                            | Setting           |
| MFAS                | Maternal-Fetal Attachment Scale                                      | Tool              |
| MOMcare             |                                                                      | <i>Study name</i> |
| MINI                | Mini-International Neuropsychiatric Interview                        | Tool              |
| NHS                 | National Health Service                                              | Setting           |
| OOP                 | Out of Pocket                                                        | Research          |
| PAD                 | perinatal anxiety and/or depression                                  | Diagnosis         |
| PBS                 | Pharmaceutical Benefits Scheme                                       | Source            |
| PCA                 | Personalised Care Approach                                           | Intervention      |
| PHQ-9               | Patient Health Questionnaire                                         | Tool              |
| PND                 | Postnatal depression                                                 | Diagnosis         |
| PND                 | Post-partum depression                                               | Diagnosis         |
| <i>PoNDER trial</i> | <b>POstNatal Depression Economic evaluation and Randomised trial</b> | <i>Study name</i> |
| PRAQ-R              | Pregnancy-Related Anxiety Questionnaire                              | Tool              |
| PTSD                | Post-Traumatic Stress Disorder                                       | Diagnosis         |
| QALY                | Quality Adjusted Life Year                                           | Analysis          |

|        |                                                                  |              |
|--------|------------------------------------------------------------------|--------------|
| RCT    | Randomised controlled trial                                      | Research     |
| SCL-20 | Hopkins Symptom Checklist-20                                     | Tool         |
| SF36   | Short-Form 36                                                    | Tool         |
| SIDS   | Sudden infant death syndrome                                     | Diagnosis    |
| SPARCS | <i>Sleep, Parenting and Relationships in a Community Setting</i> | Study name   |
| STAI   | State-Trait Anxiety Questionnaire                                | Tool         |
| TAU    | Treatment as Usual                                               | Research     |
| TENS   | Transcutaneous Electrical Nerve Stimulation                      | Intervention |
| WHO    | World Health Organisation                                        | Organisation |
| WWWT   | What Were We Thinking                                            | Tool         |

For peer review only

## Data extraction table for studies including perinatal anxiety

| Citation (Country)                                    | Study Details                                                                                                                                                                                                                                                                                                                                                                                                                                                                                                                                                  | Participants and setting                                                                                                                                                                                                                                                                                                                                                                                                                                      | Key findings                                                                                                                                                                                                                                                                                                                                                                                                                                                                                                                                                                                                                                                                                                                                                                                                                                                                                                                                                                                                          | Observations                                                                                                                                                                                                                                                                                                                                                                                                                                                                                                                                                                                                                                                                                                                                                                                                                    |
|-------------------------------------------------------|----------------------------------------------------------------------------------------------------------------------------------------------------------------------------------------------------------------------------------------------------------------------------------------------------------------------------------------------------------------------------------------------------------------------------------------------------------------------------------------------------------------------------------------------------------------|---------------------------------------------------------------------------------------------------------------------------------------------------------------------------------------------------------------------------------------------------------------------------------------------------------------------------------------------------------------------------------------------------------------------------------------------------------------|-----------------------------------------------------------------------------------------------------------------------------------------------------------------------------------------------------------------------------------------------------------------------------------------------------------------------------------------------------------------------------------------------------------------------------------------------------------------------------------------------------------------------------------------------------------------------------------------------------------------------------------------------------------------------------------------------------------------------------------------------------------------------------------------------------------------------------------------------------------------------------------------------------------------------------------------------------------------------------------------------------------------------|---------------------------------------------------------------------------------------------------------------------------------------------------------------------------------------------------------------------------------------------------------------------------------------------------------------------------------------------------------------------------------------------------------------------------------------------------------------------------------------------------------------------------------------------------------------------------------------------------------------------------------------------------------------------------------------------------------------------------------------------------------------------------------------------------------------------------------|
| Ride et al (2016)<br>(Ride et al., 2016)<br>Australia | <p><b>Study Design:</b> Economic evaluation, including cost-effectiveness and cost-utility analyses, conducted alongside a cluster-randomised trial</p> <p><b>Type of intervention [exposure]:</b> What Were We Thinking (WWWT) - a psychoeducational intervention targeted at the partner relationship, management of infant behaviour and parental fatigue.</p> <p><b>Data collection methods:</b> Data were collected from participants via computer-assisted telephone interview at baseline (6 weeks postpartum) and follow-up (26 weeks postpartum).</p> | <p><b>Sample size:</b> 359</p> <p><b>Participants:</b> English-speaking first-time mothers who had recently given birth and attended participating Maternal and Child Health Centres (MCHCs)</p> <p><b>Setting:</b> 48 Maternal and Child Health Centres in Victoria, Australia.</p> <p><b>Dates of data collection:</b> Baseline interviews took place between May 2013 and April 2014, and follow-up interviews between September 2013 and August 2014.</p> | <p><b>Primary Findings:</b> The intervention was estimated to cost \$A118.16 per participant. The analysis showed no statistically significant difference between the intervention and control groups in costs or outcomes. The incremental cost-effectiveness ratios were \$A36 451 per QALY gained and \$A152 per percentage point reduction in 30-day prevalence of depression, anxiety, and adjustment disorders. The estimate lies under the unofficial cost-effectiveness threshold of \$A55 000 per QALY; however, there was considerable uncertainty surrounding the results, with a 55% probability that WWWT would be considered cost-effective at that threshold.</p> <p><b>Additional Findings:</b> The results suggest that, although WWWT shows promise as a preventive intervention for postnatal maternal mental health problems, further research is required to reduce the uncertainty over its cost-effectiveness as there were no statistically significant differences in costs or outcomes.</p> | <p>Ride et al (2016) investigated the cost-effectiveness of the What Were We Thinking (WWWT) intervention, for the prevention of postnatal maternal mental health problems. The intervention was estimated to cost \$A118.16 per participant. The analysis showed no statistically significant difference between the intervention and control groups in costs or outcomes. The incremental cost-effectiveness ratios were \$A36 451 per QALY gained and \$A152 per percentage point reduction in 30-day prevalence of depression, anxiety, and adjustment disorders. The estimate lies under the unofficial cost-effectiveness threshold of \$A55 000 per QALY; however, there was considerable uncertainty surrounding the results, with a 55% probability that WWWT would be considered cost-effective at that threshold</p> |

### Data extraction table for studies including maternal depression

| Citation (Country)                                      | Study Details                                                                                                                                                                                                                                                                                                                                                                                                                                                                                                                                                  | Participants and setting                                                                                                                                                                                                                          | Key findings                                                                                                                                                                                                                                                                                                                                                                                                                                                                                                                                                      | Observations                                                                                                                                                                                                                                                                                                                                                                                    |
|---------------------------------------------------------|----------------------------------------------------------------------------------------------------------------------------------------------------------------------------------------------------------------------------------------------------------------------------------------------------------------------------------------------------------------------------------------------------------------------------------------------------------------------------------------------------------------------------------------------------------------|---------------------------------------------------------------------------------------------------------------------------------------------------------------------------------------------------------------------------------------------------|-------------------------------------------------------------------------------------------------------------------------------------------------------------------------------------------------------------------------------------------------------------------------------------------------------------------------------------------------------------------------------------------------------------------------------------------------------------------------------------------------------------------------------------------------------------------|-------------------------------------------------------------------------------------------------------------------------------------------------------------------------------------------------------------------------------------------------------------------------------------------------------------------------------------------------------------------------------------------------|
| Ammerman et al (2016)<br>(Ammerman et al., 2016)<br>USA | <b>Study design:</b> Cross-sectional<br><br><b>Data collection methods:</b> MEPS database, a subset of the National Health Interview Survey (NHIS) that includes information on health care utilisation and expenditures for the civilian, non-institutionalised population in the USA.                                                                                                                                                                                                                                                                        | <b>Sample size:</b> 20,531<br><br><b>Participants:</b> 2,310 high-risk mothers with depression and 18,221 high-risk mothers without depression<br><br><b>Setting:</b> USA healthcare setting<br><br><b>Dates of data collection:</b> 1996 to 2011 | <b>Primary findings:</b><br>Depressed mothers were more likely to incur insurer (0.88 vs. 0.80) and out of pocket expenses (0.86 vs. 0.77) and to have higher insurer expenses (\$4916 vs. \$3521) and out of pocket expenses (\$786 vs. \$522) (in 2015).<br><b>Additional findings:</b><br>A higher proportion of the depressed sample was Caucasian which were in relatively worse health than women from other ethnic groups. The depressed sample was more likely to have public insurance, to be English-speaking and to have a usual health care provider. | The cross-sectional study from Ammerman et al (2016) the USA conducted between 2006 and 2011 investigated the out-of-pocket expenses and insurer expenses of depressed vs non-depressed mothers. Depressed mothers were more likely to incur insurer and out of pocket expenses and to have higher insurer expenses (\$4916 vs. \$3521) and out of pocket expenses (\$786 vs. \$522) (in 2015). |
| Bauer et al (2015)<br>(Bauer et al., 2015)<br>UK        | <b>Study Design:</b> The economic analysis takes a life-course perspective from the viewpoints of the public sector, individual and society. The study analysed the effects of perinatal depression on child development outcomes of children at ages 11 and 16 years from the community-based South London Child Development Study. Economic consequences were attached to those outcomes through simple decision-analytic techniques, building on evidence from studies of epidemiology, health-related quality of life, public sector costs and employment. | <b>Sample size:</b> 120<br><br><b>Participants:</b> Mothers and children<br><br><b>Setting:</b> Two antenatal clinics in the UK<br><br><b>Dates of data collection:</b> January to December 1986                                                  | <b>Primary Findings:</b><br>Additional risks that children exposed to perinatal depression develop emotional, behavioural, or cognitive problems ranged from 5% to 21%. In addition, there was a high risk (24%) that children would have special educational needs.<br><br>For each child exposed to perinatal depression, public sector costs exceeded £3,030, costs due to reduced earnings were £1,400 and health-related quality of life loss was valued at £3,760.                                                                                          | The study examined some of the outcomes and long-term economic implications experienced by offspring who have been exposed to perinatal depression.                                                                                                                                                                                                                                             |
| Counts et al (2022)<br>(Counts et al., 2022)<br>USA     | <b>Study Design:</b> Modelling study. A decision analytic model used a simulated cohort of 1,000 Medicaid-enrolled pregnant individuals. Health care costs for individuals receiving postpartum depression preventive intervention or not, over 1 or 5 years postpartum, in a variety of scenarios, including varying rates of Medicaid churn (i.e., transitions to a new Medicaid managed care plan, commercial insurance plan, or loss of coverage) were                                                                                                     | <b>Sample size:</b> 1,000<br><br><b>Participants:</b> simulated cohort of 1,000 Medicaid enrolled pregnant individuals<br><br><b>Setting:</b> USA healthcare system.                                                                              | <b>Primary Findings:</b><br>The main outcome was the amount of clinician incentive shared in a Value-based payment (VBP) model from providing preventive interventions. The likelihood of the health care payer realising a positive return on investment if it shared 50% of 5-year                                                                                                                                                                                                                                                                              | This economic modelling study found that providing preventive interventions for PND resulted in an estimated 5-year saving of £602 <sup>□</sup>                                                                                                                                                                                                                                                 |

|                                                             |                                                                                                                                                                                                                                                                                                     |                                                                                                                                                                                                                                                                       |                                                                                                                                                                                                                                                                                                                                                                                                                                                                                                                                                                                                                                                                                                                                                                                                                                                                                                                                                                                        |                                                                                                                                                                                                                                                                                                                                                                                                                                                                                                                                           |
|-------------------------------------------------------------|-----------------------------------------------------------------------------------------------------------------------------------------------------------------------------------------------------------------------------------------------------------------------------------------------------|-----------------------------------------------------------------------------------------------------------------------------------------------------------------------------------------------------------------------------------------------------------------------|----------------------------------------------------------------------------------------------------------------------------------------------------------------------------------------------------------------------------------------------------------------------------------------------------------------------------------------------------------------------------------------------------------------------------------------------------------------------------------------------------------------------------------------------------------------------------------------------------------------------------------------------------------------------------------------------------------------------------------------------------------------------------------------------------------------------------------------------------------------------------------------------------------------------------------------------------------------------------------------|-------------------------------------------------------------------------------------------------------------------------------------------------------------------------------------------------------------------------------------------------------------------------------------------------------------------------------------------------------------------------------------------------------------------------------------------------------------------------------------------------------------------------------------------|
|                                                             | <p>estimated for the period 2020 to 2025. The model was developed between March 5 2021 and July 30 2021.</p> <p><b>Type of intervention [exposure]:</b> Individual counselling and group-based counselling.</p> <p><b>Data collection methods:</b> Simulation based on collected Medicaid data.</p> | <p><b>Dates of data collection:</b> Model developed between March 5 2021 and July 30 2021.</p>                                                                                                                                                                        | <p>expected savings with a clinician up front was also measured.</p> <p>The simulated cohort was designed to be reflective of the demographics characteristics of pregnant individuals receiving Medicaid; however, no specific demographic features were simulated. Providing preventive interventions for postpartum depression resulted in an estimated 5-year savings of \$734.12 (95% credible interval [CrI], \$217.21-\$1235.67) per person. Without health insurance churn, sharing 50% of 5-year expected savings could offer more than double the financial incentives for clinicians to prevent postpartum depression compared with traditional VBP (\$367.06 [95% CrI, \$108.61-\$617.83] vs \$177.74 [95% CrI, \$52.66-\$296.60], respectively), with a high likelihood of positive return for the health care payer (91%). As health insurance churn increased, clinician incentives from sharing estimated savings decreased (73% reduction with 50% annual churn).</p> |                                                                                                                                                                                                                                                                                                                                                                                                                                                                                                                                           |
| <p>Dagher et al (2012)<br/>(Dagher et al., 2012<br/>USA</p> | <p><b>Study design:</b> Cross-sectional</p> <p><b>Data collection methods:</b> Prices of service use and EPDS</p>                                                                                                                                                                                   | <p><b>Sample size:</b> 638 women.</p> <p><b>Participants:</b> Women receiving maternal healthcare services, from hospital discharge to 11 weeks postpartum.</p> <p><b>Setting:</b> USA healthcare setting.</p> <p><b>Dates of data collection:</b> The year 2001.</p> | <p><b>Primary findings:</b><br/>The total cost of all mental health counselling visits for the depressed group n =31 was \$138 and the cost for the non-depressed group n= 607 was \$13. This was a statistically significant difference (p &lt; 0.001).</p> <p><b>Additional findings:</b> The total cost of emergency department visits for the postpartum women was \$84 for the depressed group n = 31 and \$13 for the non-depressed group n = 607. This was a statistically significant difference (p &lt; 0.001).</p>                                                                                                                                                                                                                                                                                                                                                                                                                                                           | <p>The Dagher et al., (2012) cross-sectional study from the USA investigated expenditure from health care service from discharge until 11 weeks postpartum. There was a significant difference in healthcare expenditure between depressed and non-depressed women. The EPDS was used to measure depression. The total cost of all mental health counselling visits for the depressed group n =31 was \$138 and the cost for the non-depressed group n= 607 was \$13. This was a statistically significant difference (p &lt; 0.001).</p> |



|                                                                    |                                                                                                                                                                                                                                                                                                                                                                                                                                                                                                      |                                                                                                                                                                                                                                                                                                                                                                  |                                                                                                                                                                                                                                                                                                                                                                                                                                                                                                                                                                                                                                                                                                                                                                                                                                                                                        |                                                                                                                                                                                                                                                                                                                                                                                                                                                                                                                                                                                                                                                                                                                                                             |
|--------------------------------------------------------------------|------------------------------------------------------------------------------------------------------------------------------------------------------------------------------------------------------------------------------------------------------------------------------------------------------------------------------------------------------------------------------------------------------------------------------------------------------------------------------------------------------|------------------------------------------------------------------------------------------------------------------------------------------------------------------------------------------------------------------------------------------------------------------------------------------------------------------------------------------------------------------|----------------------------------------------------------------------------------------------------------------------------------------------------------------------------------------------------------------------------------------------------------------------------------------------------------------------------------------------------------------------------------------------------------------------------------------------------------------------------------------------------------------------------------------------------------------------------------------------------------------------------------------------------------------------------------------------------------------------------------------------------------------------------------------------------------------------------------------------------------------------------------------|-------------------------------------------------------------------------------------------------------------------------------------------------------------------------------------------------------------------------------------------------------------------------------------------------------------------------------------------------------------------------------------------------------------------------------------------------------------------------------------------------------------------------------------------------------------------------------------------------------------------------------------------------------------------------------------------------------------------------------------------------------------|
| <p>Franta et al (2022)</p> <p>(Franta et al., 2022)</p> <p>USA</p> | <p><b>Study Design:</b> Modelling study</p> <p><b>Type of intervention [exposure]:</b> Comparison of outcomes in pregnant adolescents who received versus did not receive counselling interventions</p> <p><b>Data collection methods:</b> Decision-analytic model using TreeAge Pro software</p>                                                                                                                                                                                                    | <p><b>Sample size:</b> Theoretical cohort of 180,000 individuals</p> <p><b>Participants:</b> pregnant adolescents</p> <p><b>Setting:</b> Obstetric setting</p> <p><b>Dates of data collection:</b> 2018</p>                                                                                                                                                      | <p><b>Primary Findings:</b></p> <ul style="list-style-type: none"> <li>A strategy of referral to counselling interventions was cost effective in the theoretical cohort, with 8,935 fewer cases of perinatal depression, 1,606 fewer cases of chronic depression, 166 fewer preterm deliveries, 4 fewer neonatal deaths, 1 fewer case of cerebral palsy, 20 fewer cases of SIDS. In total, there were 21,976 additional QALYs and cost savings of \$223,549,872, making it the dominant strategy (better outcomes with lower costs).</li> <li>Counselling interventions remained cost saving until the annual direct and indirect cost of chronic, severe depression was set below \$30,000, at which point it became cost effective (baseline input: \$182,309).</li> <li>It is cost effective to refer all pregnant adolescents for preventive counselling interventions.</li> </ul> | <p>Using a theoretical cohort, Franta et al. (2022) found that counselling was a cost-effective preventative measure, leading to fewer cases of perinatal and chronic depression</p>                                                                                                                                                                                                                                                                                                                                                                                                                                                                                                                                                                        |
| <p>Grote et al (2017)</p> <p>Grote et al., 2017)</p> <p>USA</p>    | <p><b>Study Design:</b> RCT, cost-benefit study</p> <p><b>Type of intervention [exposure]:</b> 18 months MOMCare collaborative care depression intervention (choice of brief interpersonal psychotherapy or pharmacotherapy or both) with enhanced maternity support services (MSS-Plus).</p> <p><b>Data collection methods:</b> Blinded telephone assessments, including depression severity on SCL-20. Unit costs of MOMCare intervention actual salary rate + fringe benefits + 30% overheads</p> | <p><b>Sample size:</b> 152</p> <p><b>Participants:</b> 152 pregnant women 12-32 wks. gestation with probable major depression or dysthymia (PTSD). Plus 12 excluded from analysis due to missing final data.</p> <p><b>Setting:</b> 10 county public health centres</p> <p><b>Dates of data collection:</b> Recruited Jan 2010 – July 2012. Study ended 2014</p> | <p><b>Primary Findings:</b> when controlled for baseline depression severity, women with probable depression and PTSD in MOMCare had 68 more depression-free days over 18 months than those in MSS-Plus (p,.05). Additional \$1,312. depression care cost per MOMCare participant with comorbid PTSD. Incremental net benefit of MOMCare was positive if a depression free days was valued at ≥ \$20</p> <p><b>Additional Findings:</b><br/> Unit costs used 2013:<br/> \$80 per 45-50 min depression care specialist (DCS) visit<br/> \$31 per 20-30 min DCS phone call<br/> (Both included time for outreach efforts and record keeping)<br/> \$247 fixed cost per patient for caseload supervision and info support<br/> Other references to US-based data sources</p>                                                                                                              | <p>In this RCT, cost-benefit study, a multicomponent collaborative care intervention for depression (MOMcare - a choice of brief interpersonal psychotherapy or pharmacotherapy or both) with enhanced maternity support services (MSS-Plus) in the public health system of Seattle, USA. The incremental benefit and cost and the net benefit for women with major depression and PTSD was estimated. When controlled for baseline depression severity, women with probable depression and PTSD in MOMCare had 68 more depression-free days over 18 months than those in MSS-Plus (p&lt;.05). There was an additional £1,943** depression care cost per MOMCare participant with comorbid PTSD. The incremental net benefit of MOMCare was positive if</p> |

|                                                                   |                                                                                                                                                                                                                                                                                                                                                                                                                                                                                                           |                                                                                                                                                                                                                                                                                                                                                                         |                                                                                                                                                                                                                                                                                                                                                                                                                                                                                                                                                                  |                                                                                                                                                                                                                                           |
|-------------------------------------------------------------------|-----------------------------------------------------------------------------------------------------------------------------------------------------------------------------------------------------------------------------------------------------------------------------------------------------------------------------------------------------------------------------------------------------------------------------------------------------------------------------------------------------------|-------------------------------------------------------------------------------------------------------------------------------------------------------------------------------------------------------------------------------------------------------------------------------------------------------------------------------------------------------------------------|------------------------------------------------------------------------------------------------------------------------------------------------------------------------------------------------------------------------------------------------------------------------------------------------------------------------------------------------------------------------------------------------------------------------------------------------------------------------------------------------------------------------------------------------------------------|-------------------------------------------------------------------------------------------------------------------------------------------------------------------------------------------------------------------------------------------|
|                                                                   |                                                                                                                                                                                                                                                                                                                                                                                                                                                                                                           |                                                                                                                                                                                                                                                                                                                                                                         |                                                                                                                                                                                                                                                                                                                                                                                                                                                                                                                                                                  | depression free days was valued below £18 <sup>1</sup> . For women with probable major depression and PTSD, MOMCare had a significant clinical benefit over MSS-Plus, with only a moderate increase in health services cost. <sup>1</sup> |
| Henderson et al (2019)<br>(Henderson et al., 2019)<br><br>UK      | <b>Study Design:</b> PONDER Cluster RCT<br><br><b>Type of intervention [exposure]:</b> GP practices assigned to usual health visitor (HV) care, HV trained to assess for PND plus offering either a CBA or a person-centred approach (PCA) weekly for 8 weeks<br><br><b>Data collection methods:</b> Postal questionnaires: Baseline including EPDS and SF36 at 6 weeks, Postnatal questionnaires at 6, 12 and 18 months postnatal. Resource use logs were completed by HVs based on their and GP records | <b>Sample size:</b> From 101 GP practices, 4,084 participants consented, baseline data from 3,449 participants.<br><br><b>Participants:</b> 2,241 lower risk women completed EPDS at 6 months – 767 control, 1,474 intervention. 1,459 women provided economic data.<br><br><b>Setting:</b> GP practices<br><br><b>Dates of data collection:</b> April 2003 for 3 years | <b>Primary Findings:</b> 99% probability of cost effectiveness at £20,000 at 6 months postnatal<br>Compared with controls, adjusted 6 months costs were £82 lower with the interventions<br><br><b>Additional Findings:</b><br>Little difference CBA to PCA – CBA marginally higher probability of being cost effective.                                                                                                                                                                                                                                         | This study found that CBT had a marginally higher probability of being cost-effective than a person-centred approach.                                                                                                                     |
| Moore Simas et al (2020)<br>(Moore Simas et al., 2020)<br><br>USA | <b>Study Design:</b> Cohort study<br><br><b>Type of intervention [exposure]:</b> PND.<br><br><b>Data collection methods:</b> Administrative claims data from the IBM Watson Health MarketScan Databases                                                                                                                                                                                                                                                                                                   | <b>Sample size:</b> 135,678<br><br><b>Participants:</b> mother-child pairs with and without postpartum depression (PND) exposure<br><br><b>Setting:</b> USA healthcare setting.<br><br><b>Dates of data collection:</b> 2010 to 2016                                                                                                                                    | <b>Primary Findings:</b> <ul style="list-style-type: none"> <li>• 33,314 mother-child pairs with PND exposure were propensity score matched to 102,364 mother-child pairs without PND exposure.</li> <li>• During the 24-month follow-up period, HRU across most service categories was significantly higher among children in the PND exposure cohort than non-PND exposure cohort.</li> <li>• Among outpatient services, the percentages of children with a physician specialist service (68% versus 64%), early-intervention screening (40% versus</li> </ul> | This cohort study assessed healthcare resource utilisation (HRU) and costs in children of mothers with and without PND                                                                                                                    |

1 <sup>1</sup> <sup>1</sup> Prices have been inflated and converted to GBP [53].

1  
2  
3  
4  
5  
6  
7  
8  
9  
10  
11  
12  
13  
14  
15  
16  
17  
18  
19  
20  
21  
22  
23  
24  
25  
26  
27  
28  
29  
30  
31  
32  
33  
34  
35  
36  
37  
38  
39  
40  
41  
42  
43  
44  
45  
46

|                                                                              |                                                                                                                                                                                                                                                                                                                                                                                                                                                                                                                                                                                                                                                                                                                                                                                      |                                                                                                                                                                                                                     |                                                                                                                                                                                                                                                                                                                                                                                                                                                                                                                                                                                                                                                                                                                                                                                                                                                                                                                                    |                                                                                                                                          |
|------------------------------------------------------------------------------|--------------------------------------------------------------------------------------------------------------------------------------------------------------------------------------------------------------------------------------------------------------------------------------------------------------------------------------------------------------------------------------------------------------------------------------------------------------------------------------------------------------------------------------------------------------------------------------------------------------------------------------------------------------------------------------------------------------------------------------------------------------------------------------|---------------------------------------------------------------------------------------------------------------------------------------------------------------------------------------------------------------------|------------------------------------------------------------------------------------------------------------------------------------------------------------------------------------------------------------------------------------------------------------------------------------------------------------------------------------------------------------------------------------------------------------------------------------------------------------------------------------------------------------------------------------------------------------------------------------------------------------------------------------------------------------------------------------------------------------------------------------------------------------------------------------------------------------------------------------------------------------------------------------------------------------------------------------|------------------------------------------------------------------------------------------------------------------------------------------|
|                                                                              |                                                                                                                                                                                                                                                                                                                                                                                                                                                                                                                                                                                                                                                                                                                                                                                      |                                                                                                                                                                                                                     | <p>37%), and an emergency room visit (48% versus 42%) were greater in children of mothers with PND (all <math>p &lt; .001</math>).</p> <ul style="list-style-type: none"> <li>• Furthermore, children of mothers with PND incurred 12% higher total healthcare costs in the first 24 months of life compared to children of mothers without PND (\$24,572 versus \$21,946; <math>p &lt; .001</math>).</li> <li>• After excluding mothers with preterm delivery, the proportion of children with ER visits, physician specialist services, and outpatient pharmacy claims was significantly higher in the PND exposure cohort than non-PND exposure cohort (all <math>p &lt; .001</math>).</li> </ul> <p><b>Additional Findings:</b><br/>The results of this analysis suggest that HRU and costs over the first 24 months of life in children of mothers with PND exceeded that of children of mothers without evidence of PND.</p> |                                                                                                                                          |
| <p>Petrou et al (2002)<br/><br/>(Petrou et al., 2002)<br/><br/><b>UK</b></p> | <p><b>Study Design:</b> Economic evaluation in which unit costs were applied to resource-use data collected alongside a longitudinal study of women at high risk of developing PND. Unit costs were applied to estimates of health and social care resource use made by 206 women recruited from antenatal clinics and their infants. Net costs per mother-infant dyad over the first 18 months post-partum were estimated.</p> <p><b>Type of intervention [exposure]:</b><br/>Preventative PND intervention.</p> <p><b>Data collection methods:</b> primiparous women attending antenatal clinics at 26–28 weeks of gestation were screened using a predictive index for PND. Women identified as being at high risk of developing PND were entered into an RCT of a preventive</p> | <p><b>Sample size:</b> 206</p> <p><b>Participants:</b> Primiparous women at high risk of developing PND</p> <p><b>Setting:</b> antenatal clinics</p> <p><b>Dates of data collection:</b> May 1997 to April 1999</p> | <p><b>Primary Findings:</b><br/>Mean mother-infant dyad costs were estimated at £2,419.00 for women with PND and £2026.90 for women without PND, a mean cost difference of £392.10 (<math>P=0.17</math>). The mean cost differences between women with and without PND reached statistical significance for community care services (<math>P=0.01</math>), but not for other categories of service. Economic costs were higher for women with extended experiences of the condition.</p>                                                                                                                                                                                                                                                                                                                                                                                                                                           | <p>Aimed to estimate the economic costs of PND in a geographically defined cohort of women at high risk of developing the condition.</p> |

|                                                            |                                                                                                                                                                                                                                                                                                                                                                                                                                                                          |                                                                                                                                                                                                                                                                                                                                           |                                                                                                                                                                                                                                                                                                                                                                                                                                                                                                                                                                                                                                                                                                                                                                                                                                                                                                                                                                                                                                                                                                                                                                                       |                                                                                                                                                                                                                                                                                                |
|------------------------------------------------------------|--------------------------------------------------------------------------------------------------------------------------------------------------------------------------------------------------------------------------------------------------------------------------------------------------------------------------------------------------------------------------------------------------------------------------------------------------------------------------|-------------------------------------------------------------------------------------------------------------------------------------------------------------------------------------------------------------------------------------------------------------------------------------------------------------------------------------------|---------------------------------------------------------------------------------------------------------------------------------------------------------------------------------------------------------------------------------------------------------------------------------------------------------------------------------------------------------------------------------------------------------------------------------------------------------------------------------------------------------------------------------------------------------------------------------------------------------------------------------------------------------------------------------------------------------------------------------------------------------------------------------------------------------------------------------------------------------------------------------------------------------------------------------------------------------------------------------------------------------------------------------------------------------------------------------------------------------------------------------------------------------------------------------------|------------------------------------------------------------------------------------------------------------------------------------------------------------------------------------------------------------------------------------------------------------------------------------------------|
|                                                            | intervention for PND delivered by trained health visitors. Economic data of women in the trial and in the observational study were pooled. An independent researcher assessed the mental state of all women at 8 weeks, 18 weeks, 12 months, and 18 months postpartum using the Structured Clinical Interview for DSM–III–R diagnoses (SCID–II).                                                                                                                         |                                                                                                                                                                                                                                                                                                                                           |                                                                                                                                                                                                                                                                                                                                                                                                                                                                                                                                                                                                                                                                                                                                                                                                                                                                                                                                                                                                                                                                                                                                                                                       |                                                                                                                                                                                                                                                                                                |
| Petrou et al (2006)<br><br>(Petrou et al., 2006)<br><br>UK | <p><b>Study Design</b> A prospective economic evaluation was conducted alongside a pragmatic RCT</p> <p><b>Type of intervention [exposure]:</b> psychosocial and psychological interventions including counselling for the prevention of PND.</p> <p><b>Data collection methods:</b> Data on health and social care use by women and their infants up to 18 months postpartum were collected, using a combination of prospective diaries and face-to-face interviews</p> | <p><b>Sample size:</b> 151 women</p> <p><b>Participants:</b> Women considered at high risk of developing PND were allocated randomly to the preventive intervention (<math>n = 74</math>) or to routine primary care (<math>n = 77</math>)</p> <p><b>Setting:</b> Health care setting.</p> <p><b>Dates of data collection:</b> c.2000</p> | <p><b>Primary Findings:</b></p> <ul style="list-style-type: none"> <li>Women in the preventive intervention group were depressed for an average of 2.21 months (9.57 weeks) during the study period, whereas women in the routine primary care group were depressed for an average of 2.70 months (11.71 weeks).</li> <li>The mean health and social care costs were estimated at £2,396.9 per mother–infant dyad in the preventive intervention group and £2,277.5 per mother–infant dyad in the routine primary care group, providing a mean cost difference of £119.5 (bootstrap 95 percent confidence interval [CI], –535.4, 784.9).</li> <li>At a willingness to pay threshold of £1,000 per month of PND avoided, the probability that the preventive intervention is cost-effective is .71 and the mean net benefit is £383.4 (bootstrap 95 percent CI, –£863.3–£1,581.5).</li> </ul> <p><b>Additional Findings:</b><br/>The preventive intervention is likely to be cost-effective even at relatively low willingness to pay thresholds for preventing 1 month of PND during the first 18 months postpartum. Given the negative impact of PND on later child development.</p> | This cost-effectiveness analysis found that given the negative impact of PND on later child development, preventive interventions are likely to be cost-effective even at relatively low willingness to pay thresholds for preventing one month of PND during the first 18 months post-partum. |
| Roberts et al (2001)<br>[42]                               | <p><b>Study design:</b> Cross-sectional</p> <p><b>Data collection methods:</b> EPDS and the Health and Social Service Utilization Questionnaire (HSUQ)</p>                                                                                                                                                                                                                                                                                                               | <p><b>Sample size:</b> 1,250</p> <p><b>Participants:</b> mothers of infants.</p>                                                                                                                                                                                                                                                          | <p><b>Primary findings:</b><br/>Costs were notably different for mothers with and without depression as determined by the EPDS (score of &gt; 12). The total cost for health and social care \$845 for mothers with</p>                                                                                                                                                                                                                                                                                                                                                                                                                                                                                                                                                                                                                                                                                                                                                                                                                                                                                                                                                               | A cross-sectional study of 1250 mothers of infants in a Canadian setting used the EPDS to investigate the costs associated with perinatal depression. It was found that                                                                                                                        |

|                                                                       |                                                                                                                                                                                                                                                             |                                                                                                                                                                                                                                                                                                                                                                                                                 |                                                                                                                                                                                                                                                                                                                                                                                                                                                                                                                                                                                                                                                                                                                                                                                                                                                                       |                                                                                                                                                                                                                                                                                              |
|-----------------------------------------------------------------------|-------------------------------------------------------------------------------------------------------------------------------------------------------------------------------------------------------------------------------------------------------------|-----------------------------------------------------------------------------------------------------------------------------------------------------------------------------------------------------------------------------------------------------------------------------------------------------------------------------------------------------------------------------------------------------------------|-----------------------------------------------------------------------------------------------------------------------------------------------------------------------------------------------------------------------------------------------------------------------------------------------------------------------------------------------------------------------------------------------------------------------------------------------------------------------------------------------------------------------------------------------------------------------------------------------------------------------------------------------------------------------------------------------------------------------------------------------------------------------------------------------------------------------------------------------------------------------|----------------------------------------------------------------------------------------------------------------------------------------------------------------------------------------------------------------------------------------------------------------------------------------------|
| Canada                                                                |                                                                                                                                                                                                                                                             | <p><b>Setting:</b> Canadian healthcare setting</p> <p><b>Dates of data collection:</b> 1999</p>                                                                                                                                                                                                                                                                                                                 | <p>depression and their infant's vs \$413 for those with lower scores. This was statistically significant difference at the (p &lt; .01).</p> <p><b>Additional findings:</b><br/>         Costs for social work visits were higher for mothers with depression and mothers with low incomes.<br/>         Total health and social care costs were double for mothers with family income below \$20,000 (\$788 v \$399) and for mothers with clinical depression (\$845 v \$413). Nursing care costs were greater for mothers with high depression scores (\$135 v \$81).</p>                                                                                                                                                                                                                                                                                          | <p>costs were notably different for mothers with and without depression. The total cost for health and social care was \$845 for mothers with depression and their infant's vs \$413 for those with lower depression scores. This was statistically significant different at p &lt; .01.</p> |
| <p>Stevenson et al (2010)<br/>(Stevenson et al., 2010)</p> <p>UK</p>  | <p><b>Study Design:</b> cost-effectiveness analysis to assess group-CBT (gCBT) in comparison with routine primary care for women with PND in the UK.</p> <p><b>Type of intervention [exposure]:</b> Group-CBT</p> <p><b>Data collection methods:</b> SR</p> | <p><b>Sample size:</b> 401</p> <p><b>Participants:</b> Data were analysed from 401 women with an EPDS score of 12 or greater at 6 weeks after childbirth, which had completed both the EPDS and the SF-6D questionnaire at both 6 weeks and 6 months</p> <p><b>Setting:</b> Postnatal healthcare setting in the UK</p> <p><b>Dates of data collection:</b> Pre-July 2009 (when PONDER study was published).</p> | <p><b>Primary Findings:</b><br/>         The mean cost per QALY from the stochastic analysis was estimated to be £36,062; however, there was considerable uncertainty around this value. The EVPI was estimated to be greater than £64 million; the key uncertainties were in the cost per woman of providing treatment and in the statistical relationship between changes in EPDS values and changes in SF-6D values. The expected value of perfect partial information for both of these parameters was more than £25 million.</p> <p><b>Additional Findings:</b><br/>         The use of gCBT does not appear to be cost-effective; however, this decision is uncertain. The value of information analyses conducted indicates that further research to provide robust information on key parameters is needed and appears justified in cost-effective terms.</p> | <p>This economic evaluation found that gCBT does not appear to be cost-effective due to the lack of literature providing robust information. Only one study, an RCT, was deemed applicable to the decision problem.</p>                                                                      |
| <p>Wilkinson et al (2017)<br/>(Wilkinson et al., 2017)</p> <p>USA</p> | <p><b>Study Design:</b> Modelling study</p> <p><b>Type of intervention [exposure]:</b> N/A</p> <p><b>Data collection methods:</b> Hypothetical cohort</p>                                                                                                   | <p><b>Sample size:</b> 1,000</p> <p><b>Participants:</b> follows a hypothetical cohort of 1000 pregnant women experiencing one live birth over a 2-year time horizon.</p>                                                                                                                                                                                                                                       | <p><b>Primary Findings:</b></p> <ul style="list-style-type: none"> <li>• Screening for and treating postpartum depression and psychosis produced 29 more healthy women at a cost of \$943 per woman.</li> <li>• The incremental cost-effectiveness ratios of the intervention branch compared to usual care were \$13,857 per QALY</li> </ul>                                                                                                                                                                                                                                                                                                                                                                                                                                                                                                                         | <p>This economic modelling study modelled the cost-effectiveness of physicians screening for and treating postpartum depression and psychosis in partnership with a psychiatrist.</p>                                                                                                        |

|  |  |                                                                                                                                                            |                                                                                                                                                                                                                                                                                                                                                                                                                                                                                                                                                                                                    |  |
|--|--|------------------------------------------------------------------------------------------------------------------------------------------------------------|----------------------------------------------------------------------------------------------------------------------------------------------------------------------------------------------------------------------------------------------------------------------------------------------------------------------------------------------------------------------------------------------------------------------------------------------------------------------------------------------------------------------------------------------------------------------------------------------------|--|
|  |  | <p><b>Setting:</b> USA healthcare setting.</p> <p><b>Dates of data collection:</b> data were obtained from literature published between 1995 and 2015.</p> | <p>gained (below the commonly accepted willingness to pay threshold of \$50,000/QALY gained) and \$10,182 per remission achieved.</p> <ul style="list-style-type: none"> <li>• These results were robust in both the deterministic and probabilistic sensitivity analyses of input parameters.</li> </ul> <p><b>Additional Findings:</b><br/>Screening for and treating postpartum depression is a cost-effective intervention and should be considered as part of usual postnatal care, which aligns with the recently proposed recommendations from the U.S. Preventive Services Task Force.</p> |  |
|--|--|------------------------------------------------------------------------------------------------------------------------------------------------------------|----------------------------------------------------------------------------------------------------------------------------------------------------------------------------------------------------------------------------------------------------------------------------------------------------------------------------------------------------------------------------------------------------------------------------------------------------------------------------------------------------------------------------------------------------------------------------------------------------|--|

For peer review only

### Data extraction table for studies including maternal health and well-being

| Citation (Country)                                                    | Study Details                                                                                                                                                                                                                                                                                                                                                                                                                                                                               | Participants and setting                                                                                                                                                                                                                                                              | Key findings                                                                                                                                                                                                                                                                                                                                                                                                                                                                                                                                                                  | Observations                                                                                                                                                                                                                                                                                                                                                                                                                                                 |
|-----------------------------------------------------------------------|---------------------------------------------------------------------------------------------------------------------------------------------------------------------------------------------------------------------------------------------------------------------------------------------------------------------------------------------------------------------------------------------------------------------------------------------------------------------------------------------|---------------------------------------------------------------------------------------------------------------------------------------------------------------------------------------------------------------------------------------------------------------------------------------|-------------------------------------------------------------------------------------------------------------------------------------------------------------------------------------------------------------------------------------------------------------------------------------------------------------------------------------------------------------------------------------------------------------------------------------------------------------------------------------------------------------------------------------------------------------------------------|--------------------------------------------------------------------------------------------------------------------------------------------------------------------------------------------------------------------------------------------------------------------------------------------------------------------------------------------------------------------------------------------------------------------------------------------------------------|
| Chojenta et al (2019)<br><br>(Chojenta et al., 2019)<br><br>Australia | <b>Study design:</b> Cross-sectional<br><br><b>Data collection methods:</b> Health economics modelling study.<br><br>Data were taken from the Australian Longitudinal Study on Women's Health (ALSWH), an ongoing population-based study of health and well-being.                                                                                                                                                                                                                          | <b>Sample size:</b> 12,689<br><br><b>Participants:</b> Three cohorts of women born 1973–78, 1946–1951 and 1921–1926, with a fourth cohort born in 1989–1995 added in 2012.<br><br><b>Setting:</b> Australian healthcare setting.<br><br><b>Dates of data collection:</b> 1921 to 1995 | <b>Primary findings:</b><br>The healthcare costs for postnatal women who had poor mental health prior to birth was \$1,792 (AUD). This is on average 11% more than for mothers with no previous history of poor mental health.                                                                                                                                                                                                                                                                                                                                                | This modelling study from Australia, utilising cohort data from 1921 to 1995 found that the healthcare costs for postnatal women who had poor mental health prior to birth was \$1,792 (AUD). This is on average 11% more than for mothers with no previous history of poor mental health.                                                                                                                                                                   |
| Morrell et al (2000)<br><br>[34]<br><br>UK                            | <b>Study Design:</b> RCT<br><br><b>Type of intervention [exposure]:</b><br>Up to 10 home visits in the first postnatal month of up to three hours duration by a community postnatal support worker.<br><br>Impact of community postnatal support worker in addition to usual community midwife care on rest and recovery, health status, satisfaction with services and NHS Resource use and costs.<br><br><b>Data collection methods:</b> Postal questionnaires (including SF36 and EPDS). | <b>Sample size:</b> 623<br><br><b>Participants:</b> Postnatal women delivering at a university hospital<br><br><b>Setting:</b> Home and community<br><br><b>Dates of data collection:</b> Recruitment on labour wards from October 1996 to November 1997                              | <b>Primary Findings:</b> 551 completed 6 weeks questionnaire, 493 at 6 months. No evidence of use of fewer NHS services by women using the support worker versus controls at 6 weeks or 6 months. Additional costs per woman at 6 weeks of £179.58 mostly due to support worker training (p<0.001).<br><br><b>Additional Findings:</b> No diff primary outcome at 6 weeks but p<0.05 for physical and social functioning and p=005 EPDS for controls. No difference in SF36 health status scores, EPDS scale or Duke Functional Social Support scale, rate of breastfeeding). | This study found that there were no savings to the NHS over six months after the introduction of a community support worker service and no improvement to the health status among the women in the intervention group, which was measured by an SF-36 questionnaire. At six weeks, the mean total NHS costs were £975 <sup>0</sup> for the intervention group and £700 for the control group. At six months, the figures were £1,250 and £980, respectively. |
| Ride (2018)                                                           | <b>Study Design:</b> Modelling study (health economics)                                                                                                                                                                                                                                                                                                                                                                                                                                     | <b>Date of model:</b> 2018<br><br>The models were developed using TreeAge Pro 2015 software (TreeAge Software, Inc.,                                                                                                                                                                  | <b>Primary Findings:</b> The results suggest that broader boundaries, particularly extension of the time horizon, could make substantial differences to                                                                                                                                                                                                                                                                                                                                                                                                                       | By ignoring broader sets of costs and outcomes, resources in postnatal mental health may be misallocated, and as a result, some women may not benefit as                                                                                                                                                                                                                                                                                                     |

|                                      |                                                                    |                                                                                                                                                                                                                                                                                                                                                                                                                                                                                                                                                                                                                        |                                                                                                                                                                                                                                                                                                                                                                                                                                                                          |                                                                                           |
|--------------------------------------|--------------------------------------------------------------------|------------------------------------------------------------------------------------------------------------------------------------------------------------------------------------------------------------------------------------------------------------------------------------------------------------------------------------------------------------------------------------------------------------------------------------------------------------------------------------------------------------------------------------------------------------------------------------------------------------------------|--------------------------------------------------------------------------------------------------------------------------------------------------------------------------------------------------------------------------------------------------------------------------------------------------------------------------------------------------------------------------------------------------------------------------------------------------------------------------|-------------------------------------------------------------------------------------------|
| <p>(Ride, 2018)</p> <p><b>UK</b></p> | <p><b>Data collection methods:</b> Decision analytic modelling</p> | <p>Williamstown, MA, USA). The population of interest was postnatal women and their children in the United Kingdom, because much of the data came from that setting; this gave an explicit societal threshold of £20,000 to £30,000 per QALY for cost-effectiveness analysis in health care. A health sector perspective was taken, except for the children's model, which expanded to a public sector perspective to accommodate educational costs. A discount rate of 3.5% was applied to costs and QALYs, with discounting applied back to the child's birth. All costs were converted to 2014 pounds sterling.</p> | <p>estimated cost-effectiveness. Inclusion of family effects without extension of the time horizon had little impact, but where a longer time horizon was used, family effects could make a significant difference to the conclusions drawn from cost-effectiveness analysis</p> <p><b>Additional Findings:</b><br/>The authors note that it is important not only to consider caregiving but also family health effects in the outcomes of maternal health studies.</p> | <p>much from interventions that might be cost-effective given a broader time-horizon.</p> |
|--------------------------------------|--------------------------------------------------------------------|------------------------------------------------------------------------------------------------------------------------------------------------------------------------------------------------------------------------------------------------------------------------------------------------------------------------------------------------------------------------------------------------------------------------------------------------------------------------------------------------------------------------------------------------------------------------------------------------------------------------|--------------------------------------------------------------------------------------------------------------------------------------------------------------------------------------------------------------------------------------------------------------------------------------------------------------------------------------------------------------------------------------------------------------------------------------------------------------------------|-------------------------------------------------------------------------------------------|



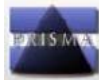

## PRISMA 2020 checklist

| Section and Topic             | Item # | Checklist item                                                                                                                                                                                                                                                                                       | Location where item is reported |
|-------------------------------|--------|------------------------------------------------------------------------------------------------------------------------------------------------------------------------------------------------------------------------------------------------------------------------------------------------------|---------------------------------|
| <b>TITLE</b>                  |        |                                                                                                                                                                                                                                                                                                      |                                 |
| Title                         | 1      | Identify the report as a systematic review.                                                                                                                                                                                                                                                          | Page 2                          |
| <b>ABSTRACT</b>               |        |                                                                                                                                                                                                                                                                                                      |                                 |
| Abstract                      | 2      | See the PRISMA 2020 for Abstracts checklist.                                                                                                                                                                                                                                                         | Figure 1                        |
| <b>INTRODUCTION</b>           |        |                                                                                                                                                                                                                                                                                                      |                                 |
| Rationale                     | 3      | Describe the rationale for the review in the context of existing knowledge.                                                                                                                                                                                                                          | Page 4                          |
| Objectives                    | 4      | Provide an explicit statement of the objective(s) or question(s) the review addresses.                                                                                                                                                                                                               | Page 4                          |
| <b>METHODS</b>                |        |                                                                                                                                                                                                                                                                                                      |                                 |
| Eligibility criteria          | 5      | Specify the inclusion and exclusion criteria for the review and how studies were grouped for the syntheses.                                                                                                                                                                                          | Page 5                          |
| Information sources           | 6      | Specify all databases, registers, websites, organisations, reference lists and other sources searched or consulted to identify studies. Specify the date when each source was last searched or consulted.                                                                                            | Page 5                          |
| Search strategy               | 7      | Present the full search strategies for all databases, registers and websites, including any filters and limits used.                                                                                                                                                                                 | Supplementary Material          |
| Selection process             | 8      | Specify the methods used to decide whether a study met the inclusion criteria of the review, including how many reviewers screened each record and each report retrieved, whether they worked independently, and if applicable, details of automation tools used in the process.                     | Page 6                          |
| Data collection process       | 9      | Specify the methods used to collect data from reports, including how many reviewers collected data from each report, whether they worked independently, any processes for obtaining or confirming data from study investigators, and if applicable, details of automation tools used in the process. | Page 6                          |
| Data items                    | 10a    | List and define all outcomes for which data were sought. Specify whether all results that were compatible with each outcome domain in each study were sought (e.g. for all measures, time points, analyses), and if not, the methods used to decide which results to collect.                        | Page 6                          |
|                               | 10b    | List and define all other variables for which data were sought (e.g. participant and intervention characteristics, funding sources). Describe any assumptions made about any missing or unclear information.                                                                                         | Page 6                          |
| Study risk of bias assessment | 11     | Specify the methods used to assess risk of bias in the included studies, including details of the tool(s) used, how many reviewers assessed each study and whether they worked independently, and if applicable, details of automation tools used in the process.                                    | Supplementary Material          |
| Effect measures               | 12     | Specify for each outcome the effect measure(s) (e.g. risk ratio, mean difference) used in the synthesis or presentation of results.                                                                                                                                                                  | Page 8                          |
| Synthesis methods             | 13a    | Describe the processes used to decide which studies were eligible for each synthesis (e.g. tabulating the study intervention characteristics and comparing against the planned groups for each synthesis (item #5)).                                                                                 | Page 6                          |
|                               | 13b    | Describe any methods required to prepare the data for presentation or synthesis, such as handling of missing summary statistics, or data conversions.                                                                                                                                                | Page 6                          |
|                               | 13c    | Describe any methods used to tabulate or visually display results of individual studies and syntheses.                                                                                                                                                                                               | From Page 9                     |
|                               | 13d    | Describe any methods used to synthesize results and provide a rationale for the choice(s). If meta-analysis was performed, describe the model(s), method(s) to identify the presence and extent of statistical heterogeneity, and software package(s) used.                                          | Page 8                          |
|                               | 13e    | Describe any methods used to explore possible causes of heterogeneity among study results (e.g. subgroup analysis, meta-regression).                                                                                                                                                                 | N/A                             |
|                               | 13f    | Describe any sensitivity analyses conducted to assess robustness of the synthesized results.                                                                                                                                                                                                         | N/A                             |
| Reporting bias assessment     | 14     | Describe any methods used to assess risk of bias due to missing results in a synthesis (arising from reporting biases).                                                                                                                                                                              | Supplementary Material          |
| Certainty                     | 15     | Describe any methods used to assess certainty (or confidence) in the body of evidence for an outcome.                                                                                                                                                                                                |                                 |

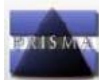

# PRISMA 2020 checklist

| Section and Topic                              | Item # | Checklist item                                                                                                                                                                                                                                                                       | Location where item is reported |
|------------------------------------------------|--------|--------------------------------------------------------------------------------------------------------------------------------------------------------------------------------------------------------------------------------------------------------------------------------------|---------------------------------|
| assessment                                     |        |                                                                                                                                                                                                                                                                                      |                                 |
| <b>RESULTS</b>                                 |        |                                                                                                                                                                                                                                                                                      |                                 |
| Study selection                                | 16a    | Describe the results of the search and selection process, from the number of records identified in the search to the number of studies included in the review, ideally using a flow diagram.                                                                                         | Page 8                          |
|                                                | 16b    | Cite studies that might appear to meet the inclusion criteria, but which were excluded, and explain why they were excluded.                                                                                                                                                          | Page 8                          |
| Study characteristics                          | 17     | Cite each included study and present its characteristics.                                                                                                                                                                                                                            | Page 8                          |
| Risk of bias in studies                        | 18     | Present assessments of risk of bias for each included study.                                                                                                                                                                                                                         | Page 8                          |
| Results of individual studies                  | 19     | For all outcomes, present, for each study: (a) summary statistics for each group (where appropriate) and (b) an effect estimate and its precision (e.g. confidence/credible interval), ideally using structured tables or plots.                                                     | Page 8                          |
| Results of syntheses                           | 20a    | For each synthesis, briefly summarise the characteristics and risk of bias among contributing studies.                                                                                                                                                                               | Page 8                          |
|                                                | 20b    | Present results of all statistical syntheses conducted. If meta-analysis was done, present for each the summary estimate and its precision (e.g. confidence/credible interval) and measures of statistical heterogeneity. If comparing groups, describe the direction of the effect. | Page 8                          |
|                                                | 20c    | Present results of all investigations of possible causes of heterogeneity among study results.                                                                                                                                                                                       | Page 8                          |
|                                                | 20d    | Present results of all sensitivity analyses conducted to assess the robustness of the synthesized results.                                                                                                                                                                           | N/A                             |
| Reporting biases                               | 21     | Present assessments of risk of bias due to missing results (arising from reporting biases) for each synthesis assessed.                                                                                                                                                              | Supplementary Material          |
| Certainty of evidence                          | 22     | Present assessments of certainty (or confidence) in the body of evidence for each outcome assessed.                                                                                                                                                                                  | Supplementary Material          |
| <b>DISCUSSION</b>                              |        |                                                                                                                                                                                                                                                                                      |                                 |
| Discussion                                     | 23a    | Provide a general interpretation of the results in the context of other evidence.                                                                                                                                                                                                    | Page 25                         |
|                                                | 23b    | Discuss any limitations of the evidence included in the review.                                                                                                                                                                                                                      | Page 2                          |
|                                                | 23c    | Discuss any limitations of the review processes used.                                                                                                                                                                                                                                | N/A                             |
|                                                | 23d    | Discuss implications of the results for practice, policy, and future research.                                                                                                                                                                                                       | Page 26                         |
| <b>OTHER INFORMATION</b>                       |        |                                                                                                                                                                                                                                                                                      |                                 |
| Registration and protocol                      | 24a    | Provide registration information for the review, including register name and registration number, or state that the review was not registered.                                                                                                                                       | Page 5                          |
|                                                | 24b    | Indicate where the review protocol can be accessed, or state that a protocol was not prepared.                                                                                                                                                                                       | Page 5                          |
|                                                | 24c    | Describe and explain any amendments to information provided at registration or in the protocol.                                                                                                                                                                                      | N/A                             |
| Support                                        | 25     | Describe sources of financial or non-financial support for the review, and the role of the funders or sponsors in the review.                                                                                                                                                        | Page 27                         |
| Competing interests                            | 26     | Declare any competing interests of review authors.                                                                                                                                                                                                                                   | Page 27                         |
| Availability of data, code and other materials | 27     | Report which of the following are publicly available and where they can be found: template data collection forms; data extracted from included studies; data used for all analyses; analytic code; any other materials used in the review.                                           | Page 9 onwards                  |



# PRISMA 2020 checklist

- 1
- 2
- 3
- 4
- 5
- 6
- 7
- 8
- 9
- 10
- 11
- 12
- 13
- 14
- 15
- 16
- 17
- 18
- 19
- 20
- 21
- 22
- 23
- 24
- 25
- 26
- 27
- 28
- 29
- 30
- 31
- 32
- 33
- 34
- 35
- 36
- 37
- 38
- 39
- 40
- 41
- 42
- 43
- 44
- 45
- 46
- 47

From: Page MJ, McKenzie JE, Bossuyt PM, Boutron I, Hoffmann TC, Mulrow CD, et al. The PRISMA 2020 statement: an updated guideline for reporting systematic reviews. *BMJ* 2021;372:n71. doi: 10.1136/bmj.n71  
 For more information, visit: <http://www.prisma-statement.org/>

For peer review only

# BMJ Open

## Health economic evaluations of preventative care for perinatal anxiety and associated disorders: A rapid review

|                                 |                                                                                                                                                                                                                                                                                                                                                                                         |
|---------------------------------|-----------------------------------------------------------------------------------------------------------------------------------------------------------------------------------------------------------------------------------------------------------------------------------------------------------------------------------------------------------------------------------------|
| Journal:                        | <i>BMJ Open</i>                                                                                                                                                                                                                                                                                                                                                                         |
| Manuscript ID                   | bmjopen-2022-068941.R2                                                                                                                                                                                                                                                                                                                                                                  |
| Article Type:                   | Original research                                                                                                                                                                                                                                                                                                                                                                       |
| Date Submitted by the Author:   | 22-Nov-2023                                                                                                                                                                                                                                                                                                                                                                             |
| Complete List of Authors:       | Pisavadia, Kalpa; Bangor University, School of Medical and Health Sciences<br>Spencer, Llinos; Bangor University, Centre for Health Economics and Medicine Evaluation<br>Tuersley, Lorna; Bangor University,<br>Coates, Rose ; City University of London,<br>Ayers, Susan; City University,<br>Edwards, Rhiannon; Bangor University, Centre for Health Economics & Medicines Evaluation |
| <b>Primary Subject Heading</b>: | Health economics                                                                                                                                                                                                                                                                                                                                                                        |
| Secondary Subject Heading:      | Health economics                                                                                                                                                                                                                                                                                                                                                                        |
| Keywords:                       | HEALTH ECONOMICS, PREVENTIVE MEDICINE, MENTAL HEALTH, Postpartum Women < Postpartum Period                                                                                                                                                                                                                                                                                              |
|                                 |                                                                                                                                                                                                                                                                                                                                                                                         |

SCHOLARONE™  
Manuscripts



I, the Submitting Author has the right to grant and does grant on behalf of all authors of the Work (as defined in the below author licence), an exclusive licence and/or a non-exclusive licence for contributions from authors who are: i) UK Crown employees; ii) where BMJ has agreed a CC-BY licence shall apply, and/or iii) in accordance with the terms applicable for US Federal Government officers or employees acting as part of their official duties; on a worldwide, perpetual, irrevocable, royalty-free basis to BMJ Publishing Group Ltd ("BMJ") its licensees and where the relevant Journal is co-owned by BMJ to the co-owners of the Journal, to publish the Work in this journal and any other BMJ products and to exploit all rights, as set out in our [licence](#).

The Submitting Author accepts and understands that any supply made under these terms is made by BMJ to the Submitting Author unless you are acting as an employee on behalf of your employer or a postgraduate student of an affiliated institution which is paying any applicable article publishing charge ("APC") for Open Access articles. Where the Submitting Author wishes to make the Work available on an Open Access basis (and intends to pay the relevant APC), the terms of reuse of such Open Access shall be governed by a Creative Commons licence – details of these licences and which [Creative Commons](#) licence will apply to this Work are set out in our licence referred to above.

Other than as permitted in any relevant BMJ Author's Self Archiving Policies, I confirm this Work has not been accepted for publication elsewhere, is not being considered for publication elsewhere and does not duplicate material already published. I confirm all authors consent to publication of this Work and authorise the granting of this licence.

# Health economic evaluations of preventative care for perinatal anxiety and associated disorders: A rapid review

Miss Kalpa Pisavadia<sup>1</sup> [Kalpa.pisavadia@bangor.ac.uk](mailto:Kalpa.pisavadia@bangor.ac.uk)

Dr Llinos Haf Spencer<sup>1</sup> [L.spencer@bangor.ac.uk](mailto:L.spencer@bangor.ac.uk)

Dr Lorna Tuersley<sup>1</sup> [Lorna.tuersley@gmail.com](mailto:Lorna.tuersley@gmail.com)

Dr Rose Coates<sup>2</sup> [Rose.coates@city.ac.uk](mailto:Rose.coates@city.ac.uk)

Professor Susan Ayers<sup>2</sup> [Susan.ayers.1@city.ac.uk](mailto:Susan.ayers.1@city.ac.uk)

Professor Rhiannon Tudor Edwards<sup>1</sup> [R.t.edwards@bangor.ac.uk](mailto:R.t.edwards@bangor.ac.uk)

**Corresponding author:** Kalpa Pisavadia Research Project Support Officer, Centre for Health Economics and Medicines Evaluation (CHEME), Ardudwy Hall, Normal Site, Bangor University, Bangor, Gwynedd, Wales, UK, LL57 2PZ. Email: [Kalpa.pisavadia@bangor.ac.uk](mailto:Kalpa.pisavadia@bangor.ac.uk)

## Abstract

**Objectives:** Perinatal mental health (PMH) problems affect one in five women and cost the United Kingdom (UK) £8.1 billion for every year of births, with 72% of this cost due to the long-term impact on the child. We conducted a rapid review of health economic evaluations of preventative care for perinatal anxiety and associated disorders.

**Design:** This study adopted a rapid review approach, using principles of the standard systematic review process to generate quality evidence. This methodology features a systematic database search, PRISMA diagram, screening of evidence, data extraction, critical appraisal, and narrative synthesis.

**Data Sources:** PubMed, Cumulative Index to Nursing and Allied Health Literature (CINAHL), Cochrane Library, *Applied Social Sciences Index and Abstracts (ASSIA)*, PsycINFO and MEDLINE.

**Eligibility criteria for selecting studies:** Studies that evaluated the costs and cost-effectiveness of preventative care for perinatal anxiety and associated disorders carried out within the National Health Service (NHS) and similar healthcare systems.

**Data extraction and synthesis:** A minimum of two independent reviewers used standardised methods to search, screen, critically appraise and synthesise included studies.

**Results:** The results indicate a lack of economic evaluation specifically for perinatal anxiety, with most studies focussing on postnatal depression (PND). Interventions to prevent postnatal mental health problems are cost-effective. Modelling studies have also been conducted, which suggest that treating PND with counselling would be cost-effective.

**Conclusion:** The costs of not intervening in maternal mental health outweigh the costs of preventative interventions. Preventative measures such as screening and counselling for maternal mental health are shown to be cost-effective interventions to improve outcomes for women and children.

**Key words:** preventative, life-course, perinatal anxiety, postnatal depression, cost of illness, cost-effectiveness, economic modelling.

**PROSPERO registration number:** CRD42022347859

## Article summary

### Strengths and limitations of this study

- The strength of this rapid review is that it has highlighted costs associated with perinatal mental health interventions in a rigorous, novel way and has identified several gaps for future research.
- The absence of health economic studies describing the range of public sector costs and costs to individuals from Scotland and Wales in relation to perinatal anxiety is a limitation of this rapid review.
- Although health economic studies are showing the benefits of investing in PND, there are no published UK-based Randomised controlled Trials (RCT) investigating perinatal mental health interventions, which include information on costs, is a limitation of this rapid review.

## Introduction

The perinatal period refers to pregnancy and the first 12 months after childbirth [1]. One in five women experience mental health problems during this time, and the cost is estimated to be £8.1 billion for every year of births in the United Kingdom (UK) [2] (see supplementary file 1 for a list of abbreviations). Maternal mental health problems include postnatal depression (PND) (also known as Postpartum Depression (PPD) internationally), characterised by depressed mood and anxiety, feelings of inadequacy, and impaired infant bonding [3].

Untreated maternal mental illness not only impacts mothers, but also adversely impacts their children, significantly contributing to wider societal and National Health Service (NHS) costs. Of the total costs of perinatal mental health difficulties in the UK, 72% is due to the long-term impact on the child [2]. Decreased maternal and infant bonding, reduced breastfeeding initiation rates and duration, low birth weight, and poorer child growth have been associated with PND [4]. Children of mothers experiencing sub-clinical and persistently high depressive symptoms were twice as likely to have emotional and behavioural difficulties than children of mothers reporting minimal symptoms [5]. Delayed or impaired cognitive, linguistic, physical, and psychological health development has been reported in infants and children with mothers with PND [4]. There is also a risk of intergenerational transmission of socio-economic disadvantage in which maternal mental illness impacts the child's quality of life by having a long-term adverse effect on education and employment prospects [6,7]. Public sector costs are likely to be significantly reduced by utilising a prevention strategy to reduce the incidence of poor maternal mental health [7].

Despite the long-term risks of untreated maternal mental health issues, as of 2014, only 30-50% of women with PMH problems were identified, and only 7% were referred to specialist care in the UK. [2]. Most women with PMH problems did not access care [2]. This may have been particularly the case for women with mild to moderate PMH problems or less commonly recognised problems, such as anxiety, obsessive-compulsive disorder (OCD), or post-traumatic stress disorder (PTSD) [2].



1  
2  
3 Access to care may also be limited by maternal time constraints and fears of being  
4 judged [8].  
5

6 The National Institute for Health and Care Excellence recommend postnatal care for  
7 up to eight weeks after birth [9]. Since 2015, it has been recommended that UK  
8 midwives carry out emotional well-being checks at antenatal check-ups and at each  
9 postnatal contact up to eight weeks after birth. In 2018, the National Collaborating  
10 Centre for Mental Health worked with NICE to develop the Perinatal Mental Health  
11 Care Pathway [10]. The guidance in that report follows a process agreed upon by  
12 NICE and sets out pathways to deliver a strategic transformation of perinatal mental  
13 health care. Psychological interventions, either alone or in conjunction with  
14 pharmacological treatment, are recommended for complex or severe mental health  
15 problems following referral to a specialist community perinatal mental health team  
16 [1].  
17  
18  
19

20 Since 2015, there have been improvements to funding plans and commitments in the  
21 provision of more specialist Community Perinatal Mental Health Services across the  
22 UK. For example, in 2019, the Scottish Government revealed that £52 million would  
23 be spent on improving access to perinatal and infant mental health services, and  
24 from 2018 to 2020, the Welsh Government increased recurrent annual funding from  
25 £1.5 million to £2.5 million for specialist PMH services [11]. In England, the  
26 Government committed £365 million to provide specialist perinatal community  
27 services across the country, as announced by NHS England in April 2019 [9]. It is,  
28 imperative that proactive planning and cost-effective preventative solutions are a  
29 public policy priority [6].  
30  
31  
32  
33

### 34 35 36 Aim

37 This review aims to investigate the type of health economic evaluations of  
38 preventative care for perinatal anxiety and associated disorders carried out within the  
39 National Health Service (NHS) and similar healthcare systems.  
40  
41  
42

### 43 44 Methods

45 This review utilised principles from the standard systematic review process to  
46 generate quality evidence in a shorter time frame. This methodology included a  
47 systematic database search, PRISMA diagram [12] (see figure 1) screening of  
48 evidence, data extraction, critical appraisal, and narrative synthesis. This revised  
49 methodology is used by the Health and Care Research Wales Evidence Centre [13–  
50 15]. Cost-effectiveness outcomes are reported according to The Professional Society  
51 for Health Economics and Outcomes Research (ISPOR) guidelines [16].  
52  
53  
54

### 55 56 Patient and Public Involvement

57 None  
58  
59  
60

## Search Strategy

The key evidence sources included PubMed, Cumulative Index to Nursing and Allied Health Literature (CINAHL), Cochrane Library, Applied Social Sciences Index and Abstracts (ASSIA), PsycINFO and MEDLINE. The search terms consisted of words related to perinatal anxiety and/or depression, health and psychiatric services and economic evaluation terms. The searches were conducted on 23 April 2022. Mendeley reference management software was used to manage study articles found and remove duplicates. See supplementary file 1 for the full search strategy.

The eligibility criteria for the review are presented in Table 1 and are based on the Population, Intervention, Comparison and Outcome (PICO) framework [17]. This consisted of peer-reviewed economic evaluations of perinatal anxiety and associated disorders such as PND and PTSD from Organisation for Economic Co-operation and Development (OECD) countries in English published after January 2000.

Table 1: Participants, Intervention/exposure, Comparator and Outcomes (PICO) framework

| Question                                                                                    |                                                                                                              |
|---------------------------------------------------------------------------------------------|--------------------------------------------------------------------------------------------------------------|
| What is the cost of care for women experiencing perinatal anxiety and associated disorders? |                                                                                                              |
| Participants                                                                                | Pregnant women or perinatal women                                                                            |
| Intervention / exposure                                                                     | Perinatal anxiety and associated disorders                                                                   |
| Comparator                                                                                  | No comparator                                                                                                |
| Outcomes                                                                                    | Costs of primary care and support services for women experiencing perinatal anxiety and associated disorders |
| Study Considerations                                                                        |                                                                                                              |
| Primary research, secondary research, grey literature, and preprints                        |                                                                                                              |
| Databases                                                                                   |                                                                                                              |
| PubMed, CINAHL, Cochrane Library, ASSIA, PsycINFO, and MEDLINE                              |                                                                                                              |

## Selection of studies

One reviewer (KP) independently selected potentially eligible studies based on a screening of titles and abstracts. Two reviewers (LHS and KP) selected additional studies from existing systematic reviews. The full texts of selected studies were assessed for eligibility by three reviewers (KP and LHS, with mediation by LT) in the data extraction process.

### Data extraction

Data extraction and study quality assessment were performed by three reviewers (KP, LHS, LT). Data was collected on country, study design, intervention type, data collection methods and dates, sample size, and type of participants (See supplementary file 2 for data extraction tables).

### Quality assessment

The quality assessment was undertaken by two reviewers (LHS and KP), and four papers were checked by a third reviewer for quality assurance purposes (LT). The Drummond checklist [18] was used for the quality appraisal of health economic papers, and the checklist for critical appraisal and data extraction for systematic reviews of prediction modelling studies (CHARMS) checklist was used for the modelling studies [19]. The Joanna Briggs Institute (JBI) critical appraisal tools were used for the quality appraisal, randomised clinical trials, cohort studies and cross-sectional studies [20–22] (see supplementary file 1).

**[Insert figure 1 here]**

## Results

Searches of databases yielded 3212 results, of which 1226 duplicates were removed. The remaining 1986 results were screened against titles and abstracts, and an additional four papers were retrieved from existing systematic reviews. A total of 17 papers met the criteria for full-text screening. Eleven papers were excluded due to not being able to access the full text (n=4), ineligible study design (n=5), or lack of relevancy (non-OECD country) (n=2). Seventeen studies were included in this rapid review (see Figure 1 and Table 2).

Of these seventeen included papers, there were cost-effectiveness studies (n=5), modelling studies (n=6), cost-benefit study (n=1), a cost analysis study (n=1) and cost of illness studies (n=4). All included studies were peer-reviewed. The included studies were categorised according to main intervention: children, prevention, cost of maternal health, cost of single interventions, and comparison cost of interventions. The following discussion provides a more detailed overview of the findings.

**Table 2: Map of maternal cost of illness studies by evidence type (including studies on depression, anxiety and maternal health and well-being)**

| Type of Evidence               | Type of intervention          |                              |                             |                              |                                  | Number of studies |
|--------------------------------|-------------------------------|------------------------------|-----------------------------|------------------------------|----------------------------------|-------------------|
|                                | Children                      | Prevention                   | Cost of maternal health     | Cost of single interventions | Comparison cost of interventions |                   |
| Cost-effectiveness             |                               | Petrou et al. (2006) [3]     |                             | Morrell et al. (2000) [23]   | Henderson et al. (2019) [24]     | 5                 |
|                                |                               | Ride et al. (2016) [25]      |                             | Stevenson et al. (2010) [26] |                                  |                   |
| Cost-benefit                   |                               |                              |                             |                              | Grote et al. (2017) [27]         | 1                 |
| Cost-analysis                  | Moore Simas et al. (2020) [4] |                              |                             |                              |                                  | 1                 |
| Cost-of-illness                |                               |                              | Petrou et al. (2002) [28]   |                              |                                  | 4                 |
|                                |                               |                              | Dagher et al. (2012) [29]   |                              |                                  |                   |
|                                |                               |                              | Ammerman et al. (2016) [30] |                              |                                  |                   |
|                                |                               |                              | Roberts et al. (2001) [31]  |                              |                                  |                   |
| Economic modelling studies     | Bauer et al. (2015) [6]       | Counts et al. (2022) [32,33] | Franta et al. (2022) [33]   |                              |                                  | 6                 |
|                                | Ride (2018) [34]              | Wilkinson et al. (2017) [35] | Chojenta et al. (2019) [36] |                              |                                  |                   |
| <b>Total number of studies</b> | <b>3</b>                      | <b>4</b>                     | <b>6</b>                    | <b>2</b>                     | <b>2</b>                         | <b>17</b>         |

Table 3: Methodological considerations and cost-effectiveness results

| Lead author (Year)          | Intervention                                                                                                                                                                                                  | Perspective (reasons)                                                   | Time horizon used in economic evaluation (reasons)                                                                                                                            | Discounting                                                                                                        | Key cost-effectiveness results                                                                                                                                                                                                                                                                                                                                                                                                                                                                                                                                  |
|-----------------------------|---------------------------------------------------------------------------------------------------------------------------------------------------------------------------------------------------------------|-------------------------------------------------------------------------|-------------------------------------------------------------------------------------------------------------------------------------------------------------------------------|--------------------------------------------------------------------------------------------------------------------|-----------------------------------------------------------------------------------------------------------------------------------------------------------------------------------------------------------------------------------------------------------------------------------------------------------------------------------------------------------------------------------------------------------------------------------------------------------------------------------------------------------------------------------------------------------------|
| Henderson et al (2019) [24] | <b>Intervention group:</b> PoNDER: Health visitor (HV) training to assess postnatal depression (PND) and deliver psychological approaches to women at risk of depression.<br><b>Control group:</b> Usual care | NHS and social care perspective.                                        | Resource use data from 6 weeks to 6 months were collected on a resource use log completed by HVs based on their own and GP records                                            | No discounting was necessary due to the duration of the follow-up period.                                          | Costs and outcomes data were available for 1459 participants. 6-month adjusted costs were £82 lower in intervention than control groups, with 0.002 additional QALY gained. The probability of cost-effectiveness at £20,000 was very high (99%).                                                                                                                                                                                                                                                                                                               |
| Morrell et al (2000) [23]   | <b>Intervention group:</b> up to 10 home visits in the first postnatal month of up to three hours duration by a community postnatal support worker.<br><b>Control group:</b> Usual care                       | NHS perspective                                                         | Up to 10 home visits in the first postnatal month of up to three hours duration by a community postnatal support worker, and a 6-month follow-up.                             | No                                                                                                                 | Cost data showed that at six weeks the mean total NHS costs were £635 for the intervention group and £456 for the control group (P = 0.001). At six months figures were £815 and £639 (P = 0.001).<br><br>However, due to there being no differences between the groups in use of social services or personal costs, no cost-effectiveness analysis was conducted.                                                                                                                                                                                              |
| Petrou et al (2006) [3]     | <b>Intervention group:</b> counselling and specific support for the mother relationship, targeted at women at high risk of developing postnatal depression.<br><b>Control group:</b> Usual care               | The economic evaluation was conducted from a public sector perspective. | The time horizon for the economic evaluation mirrored the time horizon for the randomized controlled trial, namely the period between randomization and 18 months postpartum. | Various discounting rates were applied as necessary: 0 percent, 1.5 percent, 3 percent, 6 percent, and 10 percent. | The mean health and social care costs were estimated at £2,396.9 per mother-infant dyad in the preventive intervention group and £2,277.5 per mother-infant dyad in the routine primary care group, providing a mean cost difference of £119.5 (bootstrap 95 percent confidence interval [CI], -535.4, 784.9). At a willingness to pay threshold of £1,000 per month of postnatal depression avoided, the probability that the preventive intervention is cost-effective is .71 and the mean net benefit is £383.4 (bootstrap 95 percent CI, -£863.3-£1,581.5). |
| Ride et al (2016) [25]      | Intervention group: What Were We Thinking (WWWTT) - a psychoeducational                                                                                                                                       | A range of perspectives including patient, NHS, and                     | The time horizon of 6 months mirrored the                                                                                                                                     | No discounting was necessary due to the                                                                            | The incremental cost-effectiveness ratios were \$A36 451 per QALY gained and \$A152 per percentage point                                                                                                                                                                                                                                                                                                                                                                                                                                                        |

|                             |                                                                                                                                             |                           |                                                   |                                                                           |                                                                                                                                                                                                                                                                                                                                                                                                                                                                                                                                                                                                                                                                                                          |
|-----------------------------|---------------------------------------------------------------------------------------------------------------------------------------------|---------------------------|---------------------------------------------------|---------------------------------------------------------------------------|----------------------------------------------------------------------------------------------------------------------------------------------------------------------------------------------------------------------------------------------------------------------------------------------------------------------------------------------------------------------------------------------------------------------------------------------------------------------------------------------------------------------------------------------------------------------------------------------------------------------------------------------------------------------------------------------------------|
|                             | intervention targeted at the partner relationship, management of infant behaviour and parental fatigue.<br><b>Control group:</b> Usual care | social services.          | trial follow-up period. No                        | duration of the follow-up period.                                         | reduction in 30-day prevalence of depression, anxiety, and adjustment disorders. The estimate lies under the unofficial cost-effectiveness threshold of \$A55 000 per QALY; however, there was considerable uncertainty surrounding the results, with a 55% probability that WWWT would be considered cost-effective at that threshold.                                                                                                                                                                                                                                                                                                                                                                  |
| Stevenson et al (2010) [26] | <b>Intervention group:</b> Cognitive Behaviour Therapy (gCBT).<br><b>Control group:</b> Usual care                                          | Health sector perspective | Treatment up to 8 weeks, and a 6-month follow-up. | No discounting was necessary due to the duration of the follow-up period. | The use of gCBT does not appear to be cost-effective.<br><br>The mean cost per quality adjusted life year (QALY) from the stochastic analysis was estimated to be £36,062; however, there was considerable uncertainty around this value. The expected value of perfect information (EVPI) was estimated to be greater than £64 million; the key uncertainties were in the cost per woman of providing treatment and in the statistical relationship between changes in the Edinburgh Postnatal Depression Scale (EPDS) values and changes in the Short Form – 6 Dimensions (SF-6D) values. The expected value of perfect partial information for both of these parameters was in excess of £25 million. |

The included papers are organised under three different themes: perinatal anxiety, perinatal depression, and perinatal health and well-being. These studies are detailed below, and all non-UK prices have been converted to pound sterling currency and inflated to the latest available prices [37–41].

### Summary of studies including perinatal anxiety

This review found one economic evaluation focussing on perinatal anxiety [25,42]. This study consisted of a cost-effectiveness, cost-utility analysis and cluster-

1  
2  
3 randomised controlled trial of the What Were We Thinking (WWWT) intervention  
4 [25]. WWWT is a psychoeducational intervention targeted at the partner relationship,  
5 management of infant behaviour and parental fatigue for the prevention of postnatal  
6 maternal mental health problems (See Table 3 for further details). There were no  
7 statistically significant differences in either costs or effectiveness.  
8  
9

### 10 Summary of studies including perinatal depression

11 Fifteen studies focussed on perinatal depression [3,4,6,26–33,35,43–45]. A cross-  
12 sectional study from the USA conducted between 2006 and 2011 investigated the  
13 out-of-pocket expenses and insurer expenses of depressed mothers compared to  
14 non-depressed mothers [30]. Depressed mothers were more likely to incur insurer  
15 out-of-pocket expenses (£1,285 vs £853<sup>□□</sup>) and have higher insurer expenses  
16 (£10,485 vs £7,508<sup>□□</sup>).  
17  
18

19 One Study used the perspective of the public sector, individuals, and society to  
20 examine some of the outcomes and long-term economic implications experienced by  
21 offspring who have been exposed to perinatal depression in a South London cohort  
22 [6]. Bauer et al. (2015) found that for each child exposed to perinatal depression,  
23 public sector costs exceeded £3,380<sup>□</sup>, costs due to reduced earnings were £1,562<sup>□</sup>,  
24 and health-related quality of life loss was valued at £3760<sup>□</sup>.  
25  
26

27 A decision analytic model used a simulated cohort of 1,000 Medicaid-enrolled  
28 pregnant individuals to evaluate the health care costs for individuals receiving PND  
29 preventive intervention or not, for 1 to 5 years post-partum [32]. This study found that  
30 providing preventive interventions for PPD resulted in an estimated 5-year saving of  
31 £602<sup>□□</sup>.  
32  
33

34 A cross-sectional study in the USA which investigated expenditure on healthcare  
35 services from hospital discharge until 11 weeks postpartum [29]. There was a  
36 significant difference in healthcare expenditure between depressed and non-  
37 depressed women. The Edinburgh Postnatal Depression Scale (EPDS) was used to  
38 measure depression [46]. The total cost of all mental health counselling visits for the  
39 depressed group (n=31) was £165<sup>□□</sup>, and the cost for the non-depressed group (n=  
40 607) was £15.50<sup>□□</sup> (in 2007). This was a statistically significant difference ( $p <$   
41 0.001).  
42  
43

44 Using a theoretical cohort of 180,000 individuals, a decision-analytic model  
45 compared outcomes in pregnant adolescents who received counselling interventions  
46 versus those who did not [33]. This study found that it is cost-effective to refer all  
47 pregnant adolescents for preventive counselling interventions. Within the theoretical  
48 cohort for counselling, there were 8,935 fewer cases of PND, 1,606 fewer cases of  
49 chronic depression, 166 fewer preterm deliveries, four fewer neonatal deaths, 20  
50 fewer cases of sudden infant death syndrome (SIDS), and one fewer case of  
51 cerebral palsy. In total, there were 21,976 additional QALYs and cost savings of  
52 £183,463,169<sup>^</sup>, making it the dominant strategy that had better outcomes with lower  
53 costs.  
54  
55

56 An RCT trial compared a multicomponent collaborative care intervention for  
57 depression (MOMcare - a choice of brief interpersonal psychotherapy or  
58 pharmacotherapy or both) with enhanced maternity support services (MSS-Plus) in  
59  
60

1  
2  
3 the public health system of Seattle, USA [27]. The incremental benefit and cost and  
4 the net benefit for women with major depression and PTSD were estimated. When  
5 controlled for baseline depression severity, women with probable depression and  
6 PTSD in MOMCare had 68 more depression-free days over 18 months than those in  
7 MSS-Plus ( $p < .05$ ). There was an additional £1,943<sup>□</sup> depression care cost per  
8 MOMCare participant with comorbid PTSD. The incremental net benefit of MOMCare  
9 was positive if depression free days were valued below £18<sup>□</sup>. For women with  
10 probable major depression and PTSD, MOMCare had a significant clinical benefit  
11 over MSS-Plus, with only a moderate increase in health services cost.  
12  
13

14  
15 A cluster RCT of health visitors trained to assess PND and deliver psychological  
16 approaches to women at risk of depression plus either a cognitive behavioural  
17 approach or a person-centred approach weekly for eight weeks was conducted in  
18 2019 [24]. A cost-effectiveness analysis was run parallel to this for all mothers at  
19 low-risk of depression in accordance with the EPDS at six months postnatal. This  
20 study found that CBT had a marginally higher probability of being cost-effective than  
21 a person-centred approach. The short time horizon of 6 months postnatally means  
22 that the risks of long-term adverse effects were not factored into the analysis.  
23  
24

25  
26 A cohort study with a sample size of 135,678 mother-child pairs with and without  
27 PND exposure revealed similar findings [4]. The results of this analysis suggest that  
28 the health resource utilisation and costs over the first 24 months of life in children of  
29 mothers with PND exceeded that of children of mothers without evidence of PND  
30 £22,940<sup>□</sup> and £20,487<sup>□</sup>, respectively. This was a significant difference of £2,453.  
31  
32

33  
34 A longitudinal study (18 months) conducted in 2002 estimated the economic costs of  
35 PND in cohort of women at high-risk of developing the condition with the use of an  
36 RCT to identify women considered to be of high-risk [28]. Unit costs were applied to  
37 estimates of health and social care resource use made by 206 women and their  
38 infants recruited from antenatal clinics, and net costs per mother-infant dyad over the  
39 first 18 months post-partum were estimated. This study found that costs were £587<sup>□</sup>  
40 higher for women with PND than for women without PND. Economic costs were  
41 particularly higher for women with extended experiences of the condition.  
42  
43

44  
45 A cost-effectiveness analysis of preventive interventions, consisting of counselling  
46 and support for the mother–infant relationship at high-risk of developing PND, was  
47 conducted in 2006 [3]. This study found that given the negative impact of PND on  
48 later child development, preventive interventions are likely to be cost-effective even  
49 at relatively low willingness to pay thresholds for preventing one month of PND  
50 during the first 18 months post-partum. The mean health and social care costs were  
51 estimated at £3,345<sup>□</sup> per mother–infant dyad in the preventive intervention group and  
52 £3,277<sup>□</sup> per mother–infant dyad in the routine primary care group, providing a mean  
53 cost difference of £166<sup>□</sup>.  
54  
55

56  
57 A cross-sectional study of 1,250 mothers of infants in a Canadian setting used the  
58 EPDS to investigate the costs associated with perinatal depression [31]. It was found  
59 that costs were notably different for mothers with and without depression. The total  
60 cost for health and social care was £833<sup>□</sup> for mothers with depression and their



1  
2  
3 infants, compared to £406<sup>□</sup> for those with lower depression scores. This was  
4 statistically a significant difference at  $p < .01$ .  
5  
6

7 An economic evaluation conducted in 2010 compared the cost-effectiveness of  
8 group Cognitive Behavioural Therapy (gCBT) compared with routine primary care for  
9 women with PND in the UK [26]. This economic evaluation found that gCBT does not  
10 appear to be cost-effective due to the lack of literature providing robust information.  
11 Only one study, an RCT, was deemed applicable to the decision problem.  
12  
13

14 A cost-effectiveness analysis found that screening for and treating post-partum  
15 depression is a cost-effective intervention [35]. This study followed a hypothetical  
16 cohort of 1,000 pregnant women experiencing one live birth over a 2-year time  
17 horizon. The analysis found that screening for and treating PND and psychosis  
18 produced 29 more healthy women at the cost of £938<sup>□</sup> per woman. The incremental  
19 cost-effectiveness ratios (ICERs) of the intervention branch compared to usual care  
20 were £13,702<sup>□</sup> per quality-adjusted life year (QALY) gained (below the commonly  
21 accepted willingness to pay threshold of \$50,000/QALY gained) and \$10,182 per  
22 remission achieved.  
23  
24

### 25 26 Summary of studies including maternal health and well-being

27 This review found four studies relating to the health and well-being of perinatal  
28 women [23,34,36,47]. An RCT conducted in 2000 aimed to establish the relative  
29 cost-effectiveness of postnatal support in the community in addition to the usual care  
30 provided by the community midwives [23]. Three hundred and eleven women were  
31 allocated to the intervention of up to ten home visits by a community postnatal  
32 support worker. No health benefit was found for additional home visits by community  
33 postnatal support workers compared with traditional community midwifery visiting, as  
34 measured by the Short Form 36 measure. At six months, there was no significant  
35 improvement in health status among the women in the intervention group despite  
36 there being a significant difference in costs of £1,250<sup>□</sup> (intervention group) and £980<sup>□</sup>  
37 (usual care group), ( $P = 0.001$ ). Although there were no savings to the NHS over six  
38 months after the introduction of the community postnatal support worker service, the  
39 women in the intervention group were very satisfied with the support worker visits.  
40  
41  
42

43 Authors have suggested that prenatal interventions that do not seem cost-effective in  
44 the short term may be cost-effective over a longer time horizon [48]. A decision  
45 analytic modelling study noted that it is important to consider caregiving and family  
46 health effects in the outcomes of maternal health studies [34]. By not including  
47 broader sets of costs and outcomes, resources in postnatal mental health may be  
48 misallocated. As a result, some women may not benefit as much from interventions  
49 that might be cost-effective given a broader time horizon. The uncertainty  
50 surrounding the results in the decision analytic model may reflect decisions and  
51 investment in PND interventions.  
52  
53

54 A modelling study from Australia, published in 2019, utilised cohort data from 1921 to  
55 1995 and found that the healthcare costs for postnatal women who had poor mental  
56 health prior to birth were £1,066<sup>^</sup> [36]. This is, on average, 11% more than for  
57 mothers with no previous history of poor mental health. These figures do not include  
58 out-of-pocket expenditure for the women who may have also purchased their own  
59  
60

1  
2  
3 over-the-counter medications and had other patient expenses which were not  
4 captured in the analysis.  
5  
6  
7

## 8 Discussion

9 The aim of this review was to investigate the type of health economic evaluations of  
10 preventative care for perinatal anxiety and associated disorders carried out within the  
11 National Health Service (NHS) and similar healthcare systems. Twenty-one papers  
12 were included in this review from Australia, Canada, Ireland, the USA, and the UK,  
13 each examining maternal mental health.  
14  
15

16 The results indicate a lack of economic evaluation specifically for perinatal anxiety,  
17 with most study articles focusing on PND [26]. Only two included papers focussed on  
18 anxiety, with one being a systematic review looking at anxiety alongside depression  
19 [42]. The other was an economic evaluation of a maternal mental health intervention.  
20 Treatments for maternal mental health in the WWWT intervention consisted of health  
21 visitors with psychiatric training and group sessions focusing on parenting  
22 confidence and emotional well-being with online and face-to-face components [25].  
23 The WWWT intervention shows promise as a preventive intervention, but uncertainty  
24 surrounding cost-effectiveness. The analysis showed no statistically significant  
25 difference in costs or outcomes between the intervention and control groups, with the  
26 intervention estimated to cost £74.48 per participant.  
27  
28  
29

30 Most of the studies included (n=15 of the 17 included studies) focussed on the cost  
31 of services and interventions for PND. The evidence suggests significant health  
32 resource costs outside of mental health services as well as social care costs for PND  
33 for mother and mother-infant dyad. Costs were significantly higher for children of  
34 mothers with PND than for children of mothers without PND. This was a statistically  
35 significant difference of £2,453 (p <.001) [4].  
36  
37  
38

39 Counselling was found to be a cost-effective, preventative intervention for pregnant  
40 adolescents [33]. Using a hypothetical cohort, one study found that counselling was  
41 a cost-effective preventative measure, leading to fewer cases of perinatal and  
42 chronic depression [33]. Another study estimated that group counselling (costing  
43 £114 per mother) cost around £73<sup>□</sup> less than individual counselling (£187 per  
44 mother) for mothers with PND [32]. This study found that screening for PND costs  
45 less than £2 per mother [32]. Studies that combined screening for PND with an  
46 intervention were also found to be cost-effective, resulting in 29 more healthy women  
47 at a cost of £938<sup>□□</sup> per woman [35]. The incremental cost-effectiveness ratios of the  
48 intervention branch compared to usual care were \$13,857 per QALY gained (below  
49 the commonly accepted willingness to pay threshold of \$50,000/QALY gained) and  
50 \$10,182 per remission achieved.  
51  
52  
53

54 Within this review, the EPDS, a validated measure for postnatal depression and  
55 anxiety [46], was the most frequently used instrument to detect perinatal and PND in  
56 the included studies, followed by the SF-36 scale, postal questionnaires such as the  
57 Ontario health survey, Health and Social Service Utilisation Questionnaire (HSUQ),  
58 blinded telephone assessments and medical records, Medicaid data, resource use  
59  
60

logs completed by health visitors based on GP records, and prospective diaries and face-to-face interviews.

In summary, screening was found to be a relatively low-cost method of identifying women in need of mental health support during the perinatal period. Interventions to prevent postnatal mental health problems were found to be cost-effective [25]. Also, two modelling studies found that treating PND with counselling would be cost-effective [26,35].

Future research in this area should investigate how best to screen all mothers to prevent and treat further adverse outcomes such as anxiety, OCD, or PTSD [2]. Various psycho-social methods could be used to screen and provide treatment over the telephone, online or face-to-face. Interventions could be provided by a range of healthcare professionals, such as midwives, health visitors, counsellors, psychologists, and psychiatrists. The effectiveness and cost-effectiveness of each intervention, including screening, should be evaluated.

Web-based approaches are already promising to be cost-effective solutions to support mothers in the perinatal period. A recent cost-effectiveness study alongside an RCT in Singapore evaluated a web-based approach for delivering a psychoeducational intervention [14]. This web-based approach was cost-effective in supporting first-time mothers and provided the best improvements in self-efficacy, social support, and psychological well-being of mothers in the perinatal period. Most women of childbearing age, including women who reside in rural areas, now have access to the internet in the UK and similar health care systems. Being able to access support and treatment using online resources has widened access to care to postnatal care support.

### Limitations of this study

Although this study conducted a thorough systematic search, only peer-reviewed literature was included. Relevant grey literature in this area may provide more insight into preventative interventions for maternal mental health that could be cost-effective. The findings in this area are limited by the literature available, particularly the absence of published RCTs with cost data, which would provide a rigorous method of hypothesis testing of perinatal mental health interventions.

### Conclusion

This review demonstrated that very few economic evaluations have focussed on perinatal anxiety, and those which reported on cost of perinatal depression had short time horizons which did not allow for long-term outcomes for the mother and child dyad to be addressed. However, there was some evidence that preventative measures, such as postnatal depression screening, combined with treatment, such as counselling for maternal mental health, are proven to be effective interventions to improve outcomes for women and children.

## Recommendations

It is recommended that:

- Mothers should be screened for maternal mental health issues to identify mothers at risk and provide treatment, leading to better outcomes for the mother and child dyad.
- Studies focussing on interventions for perinatal anxiety as a distinct condition to other mental health issues such as depression should be conducted.
- Cost of intervention studies related to perinatal anxiety should be conducted.

**Acknowledgements:** The authors thank the wider MAP ALLIANCE team from City University of London and the University of Stirling for input into the development of this review. We would also like to thank Yasmine Noorani, Academic Support Librarian at Bangor University, for her assistance in creating our search strategy. Additional thanks to Dr Catherine Lawrence for early input and feedback on this paper.

**Contributors:** The review was conceived by RTE, and the protocol was developed by LT, KP and LHS; searches were undertaken by KP; article screening was carried out by KP and LHS with mediation by LT; quality appraisal was undertaken by KP, LHS and LT; data were interpreted by all authors; the manuscript was drafted by KP and LHS and critically reviewed by all authors, RC, SA and RTE.

**Funding:** This review is to complement the MAP ALLIANCE study, funded by the National Institute for Health and Care Research (NIHR) (Award ID: NIHR133727). This rapid review was partially funded by Health and Care Economics Cymru (HCEC), an organisation funded by Health and Care Research Wales.

**Conflict of interest:** All authors declare that they have no conflicts of interest.

**Ethical approval:** The MAP ALLIANCE study received ethical approval from the West of Scotland Research Ethics Committee on 6<sup>th</sup> May 2022 (REC 3. Reference: 22/WS/0029).

**Data statement:** No datasets were generated and/or analysed for this study

## References

- [1] NHS England and NHS Improvement. The Perinatal Mental Health Care Pathways NHS England and NHS Improvement. 2018.
- [2] Bauer A, Personage M, Knapp M, Lemmi V, Adeleja B. Costs of perinatal mental health problems. London: 2014.
- [3] Petrou S, Cooper P, Murray L, Davidson LL, Lawson C, Woolgar M, et al. Cost-effectiveness of a preventive counseling and support package for postnatal depression. *Int J Technol Assess Health Care* 2006;22:443–53. <https://doi.org/10.1017/S0266462306051361>.
- [4] Moore Simas TA, Huang MY, Packnett ER, Zimmerman NM, Moynihan M, Eldar-Lissai A. Matched cohort study of healthcare resource utilization and costs in young children of mothers with postpartum depression in the United States. *J Med Econ* 2020;23:174–83. <https://doi.org/10.1080/13696998.2019.1679157>.
- [5] Giallo R, Woolhouse H, Gartland D, Hiscock H, Brown S. The emotional–behavioural functioning of children exposed to maternal depressive symptoms across pregnancy and early childhood: a prospective Australian pregnancy cohort study. *Eur Child Adolesc Psychiatry* 2015;24:1233–44. <https://doi.org/10.1007/s00787-014-0672-2>.
- [6] Bauer A, Pawlby S, Plant DT, King D, Pariante CM, Knapp M. Perinatal depression and child development: Exploring the economic consequences from a South London cohort. *Psychol Med* 2015;45:51–61. <https://doi.org/10.1017/S0033291714001044>.
- [7] Hardcastle K, Bellis MA, Ford K, Hughes K, Garner J, Ramos Rodriguez G. Measuring the relationships between adverse childhood experiences and educational and employment success in England and Wales: findings from a retrospective study. *Public Health* 2018;165:106–16. <https://doi.org/10.1016/J.PUHE.2018.09.014>.
- [8] Posmontier B, Neugebauer R, Stuart S, Chittams J, Shaughnessy R. Telephone-Administered Interpersonal Psychotherapy by Nurse-Midwives for Postpartum Depression. *J Midwifery Womens Health* 2016;61:456–66. <https://doi.org/10.1111/jmwh.12411>.
- [9] The National Institute of Health and Care Excellence. NICE | The National Institute for Health and Care Excellence 2022. <https://www.nice.org.uk/> (accessed February 9, 2022).
- [10] National Institute for Health and Care Excellence. Maternity and mental health 2022. <https://www.nice.org.uk/about/what-we-do/into-practice/measuring-the-use-of-nice-guidance/impact-of-our-guidance/niceimpact-maternity/ch2-maternity-and-mental-health> (accessed July 27, 2022).

- 1  
2  
3 [11] Maternal Mental Health Alliance. Map of Specialist Community Perinatal  
4 Mental Health Teams (UK). 2020.  
5
- 6 [12] Page M, McKenzie J, Bossuyt P, Boutron I, Hoffmann T, Mulrow C. The  
7 PRISMA 2020 statement: an updated guideline for reporting systematic  
8 reviews. *BMJ* 2021;10. <https://doi.org/doi.org/10.1186/s13643-021-01626-4>.  
9
- 10 [13] Health and Care Research Wales. Impact of the COVID-19 pandemic on the  
11 health and access to health care of disabled people: a rapid review 2022.  
12 [https://healthandcareresearchwales.org/impact-covid-19-pandemic-disabled-](https://healthandcareresearchwales.org/impact-covid-19-pandemic-disabled-people)  
13 [people](https://healthandcareresearchwales.org/impact-covid-19-pandemic-disabled-people) (accessed May 10, 2022).  
14  
15
- 16 [14] Health and Care Research Wales. Modelling studies used to evaluate the  
17 effect of population-level non-pharmaceutical interventions on the reproduction  
18 number of Severe Acute Respiratory Syndrome Coronavirus 2 (SARS-CoV-2)  
19 2022. [https://healthandcareresearchwales.org/modelling-studies-used-](https://healthandcareresearchwales.org/modelling-studies-used-evaluate-effect-population-level-non-pharmaceutical-interventions)  
20 [evaluate-effect-population-level-non-pharmaceutical-interventions](https://healthandcareresearchwales.org/modelling-studies-used-evaluate-effect-population-level-non-pharmaceutical-interventions) (accessed  
21 May 10, 2022).  
22  
23
- 24 [15] Tricco AC, Khalil H, Holly C, Feyissa G, Godfrey C, Evans C, et al. Rapid  
25 reviews and the methodological rigor of evidence synthesis. *JBI Evid Synth*  
26 2022; Publish Ah:944–9. <https://doi.org/10.11124/jbies-21-00371>.  
27  
28
- 29 [16] Mandrik O, Severens J, Bardach A, Ghabri S, Hamel C, Mathes T, et al.  
30 Critical Appraisal of Systematic Reviews With Costs and Cost-Effectiveness  
31 Outcomes: An ISPOR Good Practices Task Force Report 2021.  
32 <https://doi.org/10.1016/j>.  
33
- 34 [17] Schardt C, Adams MB, Owens T, Keitz S, Fontelo P. Utilization of the PICO  
35 framework to improve searching PubMed for clinical questions. *BMC Med*  
36 *Inform Decis Mak* 2007;7:1–6.  
37  
38
- 39 [18] Drummond MF, Sculpher MJ, Claxton K, Stoddart GL, Torrance G W. *Methods*  
40 *for the economic evaluation of health care programmes*. 4th ed. Oxford: Oxford  
41 University Press; 2015.  
42
- 43 [19] Moons KGM, de Groot JAH, Bouwmeester W, Vergouwe Y, Mallett S, Altman  
44 DG, et al. Critical Appraisal and Data Extraction for Systematic Reviews of  
45 Prediction Modelling Studies: The CHARMS Checklist. *PLoS Med* 2014;11.  
46 <https://doi.org/10.1371/journal.pmed.1001744>.  
47  
48
- 49 [20] Aromataris E, Fernandez R, Godfrey C, Holly C, Kahlil H, Tungpunkom P.  
50 Summarizing systematic reviews: methodological development, conduct and  
51 reporting of an Umbrella review approach. *Int J Evid Based Healthc* 2015  
52 2015;13:132–40.  
53
- 54 [21] Tufanaru C, Munn Z, Aromataris E, Campbell J, Hopp L. Systematic reviews of  
55 effectiveness. In: Aromataris E, Munn Z, editors. *JBI Manual for Evidence*  
56 *Synthesis*, JBI; 2020.  
57  
58  
59  
60

- 1  
2  
3 [22] Moola S, Munn Z, Tufanaru C, Aromataris E, Sears K, Sfetcu R, et al.  
4 Systematic reviews of etiology and risk. In: Aromataris E, Munn Z, editors.  
5 Manual for Evidence Synthesis, JBI; 2020.  
6  
7 [23] Morrell CJ, Spiby H, Stewart P, Walters S, Morgan A. Costs and effectiveness  
8 of community postnatal support workers: Randomised controlled trial. *Br Med J*  
9 2000;321:593–8. <https://doi.org/10.1136/BMJ.321.7261.593>.  
10  
11 [24] Henderson C, Dixon S, Bauer A, Knapp M, Jane Morrell C, Slade P, et al.  
12 Cost-effectiveness of PoNDER health visitor training for mothers at lower risk  
13 of depression: Findings on prevention of postnatal depression from a cluster-  
14 randomised controlled trial. *Psychol Med* 2019;49:1324–34.  
15 <https://doi.org/10.1017/S0033291718001940>.  
16  
17 [25] Ride J, Lorgelly P, Tran T, Wynter K, Rowe H, Fisher J. Preventing postnatal  
18 maternal mental health problems using a psychoeducational intervention: the  
19 cost-effectiveness of What Were We Thinking. *BMJ Open* 2016;6.  
20 <https://doi.org/10.1136/bmjopen-2016>.  
21  
22 [26] Stevenson MD, Scope A, Sutcliffe PA. The Cost-Effectiveness of Group  
23 Cognitive Behavioral Therapy Compared with Routine Primary Care for  
24 Women with Postnatal Depression in the UK. *Value in Health* 2010;13:580–4.  
25 <https://doi.org/10.1111/j.1524-4733.2010.00720.x>.  
26  
27 [27] Grote NK, Simon GE, Russo J, Lohr MJ, Carson K, Katon W. Incremental  
28 benefit-cost of MOMCare: Collaborative care for perinatal depression among  
29 economically disadvantaged women. *Psychiatric Services* 2017;68:1164–71.  
30 <https://doi.org/10.1176/APPI.PS.201600411>.  
31  
32 [28] Petrou S, Cooper P, Murray L, Davidson LL. Economic costs of post-natal  
33 depression in a high-risk British cohort. *British Journal of Psychiatry*  
34 2002;181:505–12. <https://doi.org/10.1192/bjp.181.6.505>.  
35  
36 [29] Dagher RK, McGovern PM, Dowd BE, Gjerdingen DK. Postpartum depression  
37 and health services expenditures among employed women. *J Occup Environ*  
38 *Med* 2012;54:210–5. <https://doi.org/10.1097/JOM.0B013E31823FDF85>.  
39  
40 [30] Ammerman RT, Chen J, Mallow PJ, Rizzo JA, Folger AT, van Ginkel JB.  
41 Annual direct health care expenditures and employee absenteeism costs in  
42 high-risk, low-income mothers with major depression. *J Affect Disord*  
43 2016;190:386–94. <https://doi.org/10.1016/J.JAD.2015.10.025>.  
44  
45 [31] Roberts J, Sword W, Watt S, Gafni A, Krueger P, Sheehan D, et al. Costs of  
46 postpartum care examining associations from the Ontario mother and infant  
47 survey. *Canadian Journal of Nursing Research* 2001;33:19–34.  
48  
49 [32] Counts NZ, Kuklinski MR, Wong V, Feinberg ME, Creedon TB. Comparison of  
50 Estimated Incentives for Preventing Postpartum Depression in Value-Based  
51 Payment Models Using the Net Present Value of Care vs Total Cost of Care.  
52 *JAMA Netw Open* 2022;5:e229401.  
53 <https://doi.org/10.1001/JAMANETWORKOPEN.2022.9401>.  
54  
55  
56  
57  
58  
59  
60

- 1  
2  
3 [33] Franta G, Hersh AR, Cirino NH, Caughey AB. Prevention of perinatal  
4 depression with counseling in adolescents: a cost-effectiveness analysis. *The*  
5 *Journal of Maternal-Fetal & Neonatal Medicine: The Official Journal of the*  
6 *European Association of Perinatal Medicine* 2022.  
7 <https://doi.org/10.1080/14767058.2022.2049746>.  
8  
9  
10 [34] Ride J. Setting the Boundaries for Economic Evaluation: Investigating Time  
11 Horizon and Family Effects in the Case of Postnatal Depression. *Value in*  
12 *Health* 2018;21:573–80. <https://doi.org/10.1016/j.jval.2017.10.016>.  
13  
14 [35] Wilkinson A, Anderson S, Wheeler SB. Screening for and Treating Postpartum  
15 Depression and Psychosis: A Cost-Effectiveness Analysis. *Matern Child*  
16 *Health J* 2017;21:903–14. <https://doi.org/10.1007/s10995-016-2192-9>.  
17  
18 [36] Chojenta C, William J, Martin MA, Byles J, Loxton D. The impact of a history of  
19 poor mental health on health care costs in the perinatal period. *Arch Womens*  
20 *Ment Health* 2019;22:467–73. <https://doi.org/10.1007/S00737-018-0912-4>.  
21  
22 [37] Bank of England. Inflation calculator 2022.  
23 <https://www.bankofengland.co.uk/monetary-policy/inflation/inflation-calculator>  
24 (accessed August 18, 2022).  
25  
26 [38] U.S. Bureau of Labor Statistics. CPI Inflation Calculator 2022.  
27 [https://www.bls.gov/data/inflation\\_calculator.htm](https://www.bls.gov/data/inflation_calculator.htm) (accessed August 18, 2022).  
28  
29 [39] Google. Google currency converter 2022.  
30 [https://www.google.com/search?q=currency+convertor&rlz=1C1GCEA\\_enGB991GB991&oq=currency+convertor&aqs=chrome..69i57j0i10i131i433l2j0i10i7.4286j1j3&sourceid=chrome&ie=UTF-8](https://www.google.com/search?q=currency+convertor&rlz=1C1GCEA_enGB991GB991&oq=currency+convertor&aqs=chrome..69i57j0i10i131i433l2j0i10i7.4286j1j3&sourceid=chrome&ie=UTF-8) (accessed September 5, 2022).  
31  
32 [40] Bank of Canada. Inflation Calculator 2022.  
33 <https://www.bankofcanada.ca/rates/related/inflation-calculator/> (accessed  
34 August 18, 2022).  
35  
36 [41] Reserve Bank of Australia 2022.  
37 <https://www.rba.gov.au/calculator/annualDecimal.html> (accessed March 29,  
38 2023).  
39  
40 [42] Camacho EM, Shields GE. Cost-effectiveness of interventions for perinatal  
41 anxiety and/or depression: A systematic review. *BMJ Open* 2018;8.  
42 <https://doi.org/10.1136/bmjopen-2018-022022>.  
43  
44 [43] Gurung B, Jackson LJ, Monahan M, Butterworth R, Roberts TE. Identifying  
45 and assessing the benefits of interventions for postnatal depression: A  
46 systematic review of economic evaluations. *BMC Pregnancy Childbirth*  
47 2018;18. <https://doi.org/10.1186/S12884-018-1738-9>.  
48  
49 [44] Henderson J. The cost effectiveness of prenatal care - ProQuest 1994.  
50 <https://www.proquest.com/assia/docview/196971225/abstract/36297FA264EA438FPQ/1?accountid=14874> (accessed May 21, 2022).  
51  
52  
53  
54  
55  
56  
57  
58  
59  
60



- 1  
2  
3 [45] Morrell CJ, Sutcliffe P, Booth A, Stevens J, Scope A, Stevenson M, et al. A  
4 systematic review, evidence synthesis and meta-analysis of quantitative and  
5 qualitative studies evaluating the clinical effectiveness, the cost-effectiveness,  
6 safety and acceptability of interventions to prevent postnatal depression.  
7 Health Technol Assess 2016;20:1–414. <https://doi.org/10.3310/HTA20370>.  
8  
9  
10 [46] Cox JL, Chapman G, Murray D, Jones P. Validation of the Edinburgh postnatal  
11 depression scale ( EPDS) in non-postnatal women. vol. 39. 1996.  
12  
13 [47] Moran PS, Wuytack F, Turner M, Normand C, Brown S, Begley C, et al.  
14 Economic burden of maternal morbidity – A systematic review of cost-of-illness  
15 studies. PLoS One 2020;15.  
16 <https://doi.org/10.1371/JOURNAL.PONE.0227377>.  
17  
18 [48] Ride J. Setting the Boundaries for Economic Evaluation: Investigating Time  
19 Horizon and Family Effects in the Case of Postnatal Depression 2018.  
20 <https://doi.org/10.1016/j.jval.2017.10.016>.  
21  
22  
23  
24  
25  
26  
27  
28  
29  
30  
31  
32  
33  
34  
35  
36  
37  
38  
39  
40  
41  
42  
43  
44  
45  
46  
47  
48  
49  
50  
51  
52  
53  
54  
55  
56  
57  
58  
59  
60

1  
2  
3  
4  
5  
6  
7  
8  
9  
10  
11  
12  
13  
14  
15  
16  
17  
18  
19  
20  
21  
22  
23  
24  
25  
26  
27  
28  
29  
30  
31  
32  
33  
34  
35  
36  
37  
38  
39  
40  
41  
42  
43  
44  
45  
46

## Figure legend

Figure 1. PRISMA study selection flowchart (Page et al., 2021b)

For peer review only

Figure 1. PRISMA study selection flowchart (Page et al., 2021b)

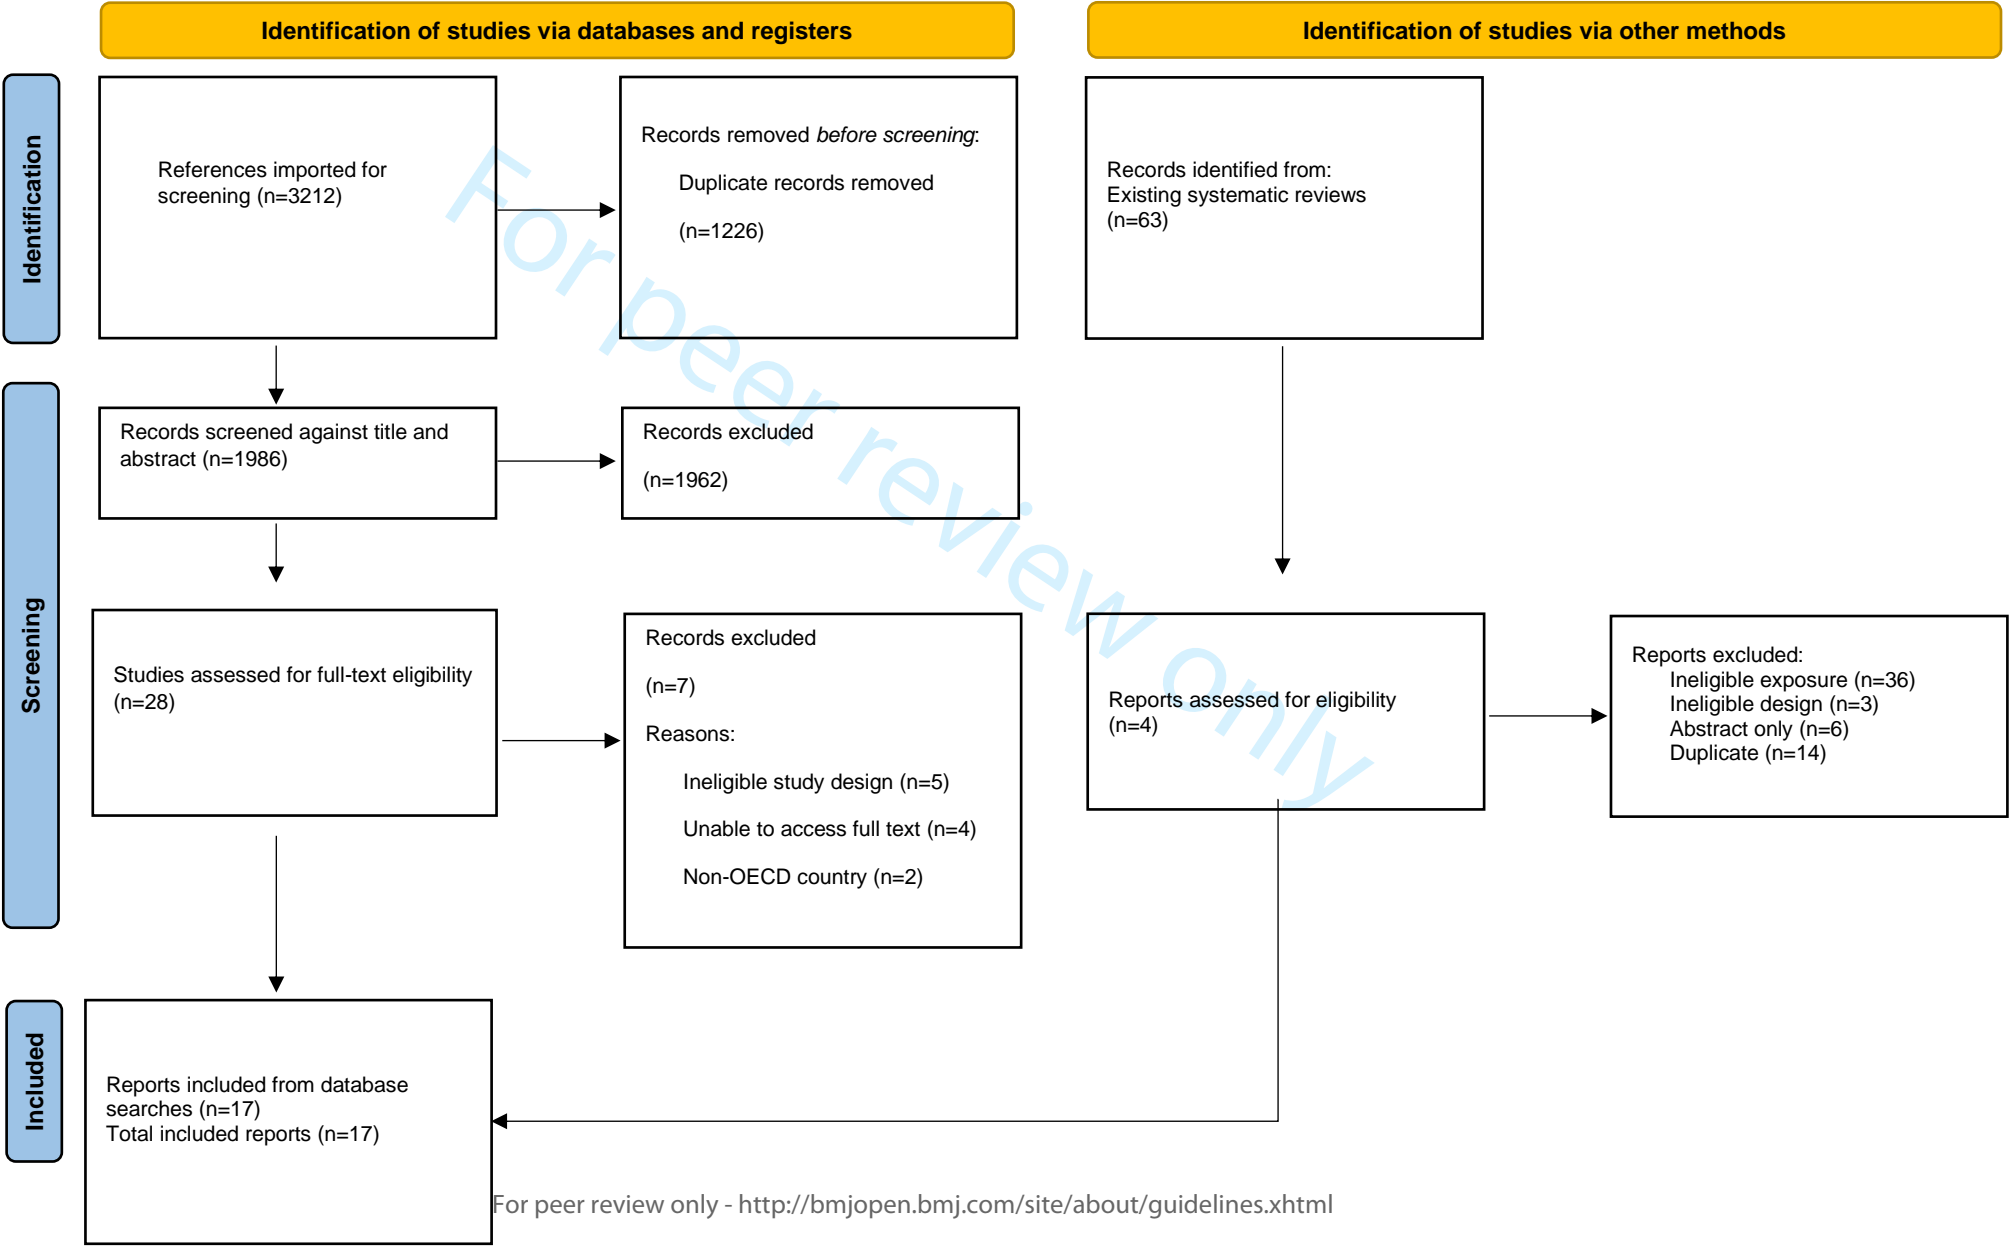

## Search strategy

Below is an example of a search strategy for the Medline database.

| ID | Search terms                                                                                                                                              |
|----|-----------------------------------------------------------------------------------------------------------------------------------------------------------|
| 1  | exp Pregnancy/                                                                                                                                            |
| 2  | (pregnan* or childbearing).ti,ab,kw.                                                                                                                      |
| 3  | (postpartum or post-partum or postnatal or postnatal or perinatal or peri-natal or prenatal or pre-natal or antenatal or ante-natal or matern*).ti,ab,kw. |
| 4  | perinatal anxiety.ti,ab,kw. or exp Perinatal anxiety/                                                                                                     |
| 5  | exp Depression/                                                                                                                                           |
| 6  | depress\$.ti,ab,kw.                                                                                                                                       |
| 7  | 5 or 6                                                                                                                                                    |
| 8  | (Infant or baby or child).ti,ab,kw                                                                                                                        |
| 9  | (care* or treatment).ti,ab,kw                                                                                                                             |
| 10 | NHS.ti,ab,kw                                                                                                                                              |
| 11 | hospitali\$ation*.ti,ab,kw                                                                                                                                |
| 12 | exp Resource allocation/                                                                                                                                  |
| 13 | economic evaluation\$.ti,ab,kw.                                                                                                                           |
| 14 | (cost* or economic* or pharmacoeconomic*).ti.                                                                                                             |
| 15 | 13 or 14                                                                                                                                                  |
| 16 | exp "costs and cost analysis"/ or exp Health Care Costs/                                                                                                  |
| 17 | exp Cost-Benefit Analysis/                                                                                                                                |
| 18 | (cost* adj2 (effective* or utility* or benefit* or consequence* or minimi*)).ti,ab,kw.                                                                    |
| 19 | 16 or 17 or 18                                                                                                                                            |
| 20 | quality-adjusted life year\$.ti,ab,kw. or exp Quality-Adjusted Life Years/                                                                                |
| 21 | Or 7 and 15 and 19                                                                                                                                        |

## Quality appraisal of health economic evaluation studies [24]

| Drummond et al checklist 2015                                                                    | Petrou et al (2002) [40] | Petrou et al (2006) [4] | Ride et al (2016) [32] | Henderson et al (2019) [38] |
|--------------------------------------------------------------------------------------------------|--------------------------|-------------------------|------------------------|-----------------------------|
| 1. Was a well defined question posed in an answerable form?                                      | Yes                      | Yes                     | Yes                    | Yes                         |
| 2. Was a comprehensive description of the competing alternatives given?                          | n/a                      | n/a                     | Yes                    | Yes                         |
| 3. Was the effectiveness of the programs or services established?                                | n/a                      | n/a                     | Yes                    | Yes                         |
| 4. Were all the important and relevant costs and consequences for each alternative identified?   | n/a                      | n/a                     | Yes                    | Yes                         |
| 5. Were costs and consequences measured accurately in appropriate physical units?                | Yes                      | Yes                     | Yes                    | Yes                         |
| 6. Were costs and consequences valued credibly?                                                  | Yes                      | Yes                     | Yes                    | Yes                         |
| 7. Were costs and consequences adjusted for differential timing?                                 | n/a                      | n/a                     | No                     | No                          |
| 8. Was an incremental analysis of costs and consequences of alternatives performed?              | n/a                      | n/a                     | No                     | Yes                         |
| 9. Was allowance made for uncertainty in the estimates of costs and consequences?                | Yes                      | Yes                     | Yes                    | Yes                         |
| 10. Did the presentation and discussion of study results include all issues of concern to users? | Yes                      | Yes                     | Yes                    | Yes                         |

Source of checklist: Drummond, M. F., Sculpher, M. J., Claxton, K., Stoddart, G. L., & Torrance G W. (2015). *Methods for the economic evaluation of health care programmes* (4th ed.). Oxford: Oxford University Press.

## Quality appraisal of health economic modelling studies with CHARMS Checklist [25]

| Domain                            | Key items                                                                                 | Counts et al (2022) - [34] | Franta et al (2022) - (Franta et al., 2022) | Ride (2018) - [45] | Wilkins on et al (2017) - [5] | Bauer et al (2015) (Bauer et al, 2015) | Stevenson et al, (2010) [42] |
|-----------------------------------|-------------------------------------------------------------------------------------------|----------------------------|---------------------------------------------|--------------------|-------------------------------|----------------------------------------|------------------------------|
| <b>SOURCE OF DATA</b>             | Source of data (e.g., cohort, case-control, randomized trial participants).               | p.3                        | p.2                                         | p.575              | p.3                           | p.52                                   | p.581                        |
| <b>PARTICIPANTS</b>               | Participant eligibility and recruitment method (e.g., consecutive participants, location, | p.3                        | p.2                                         | p.575              | p.3                           | p.52                                   | p.581                        |
|                                   | Participant description                                                                   | p.3                        | p.2                                         | p.575              | p.3                           | p.52                                   | p.581                        |
|                                   | Details of treatments received, if                                                        | p.5                        | p.2                                         | p.575              | p.3                           | p.52                                   | N/A                          |
|                                   | Study dates                                                                               | p.4                        | p.2                                         | p.575              | p.3                           | p.52                                   | p.581                        |
| <b>OUTCOME(S) TO BE PREDICTED</b> | Definition and method for measurement of outcome                                          | p.4                        | p.2                                         | p.574              | p.4                           | p.53                                   | p.581-582                    |
|                                   | Was the same outcome definition (and method for measurement ) used in all                 | Yes p.5                    | p.2                                         | p.574              | p.4                           | p.53                                   | p.581-582                    |
|                                   | Type of outcome (e.g., single or combined                                                 | p.3                        | p.5                                         | p.574              | p.4                           | p.53                                   | p.581                        |
|                                   | Was the outcome assessed without knowledge of                                             | No                         | No                                          | No                 | No                            | No                                     | p.581                        |
|                                   | Were candidate predictors part of the outcome                                             | No                         | No                                          | No                 | No                            | No                                     | p.581                        |

|                                              |                                                                                                    |         |         |         |         |         |           |
|----------------------------------------------|----------------------------------------------------------------------------------------------------|---------|---------|---------|---------|---------|-----------|
|                                              | Time of outcome occurrence or summary of duration of follow-up                                     | p.5     | p.5     | p.578   | p.4     | p.52    | p.581     |
| <b>CANDIDATE PREDICTORS (OR INDEX TESTS)</b> | Number and type of predictors (e.g., demographics, patient history, physical examination,          | p.5     | p.5     | p.577   | p.6     | p.55    | p.582     |
|                                              | Definition and method for measurement of candidate predictors                                      | p.5     | p.5     | p.575   | p.6     | p.55    | p.580-582 |
|                                              | Timing of predictor measurement (e.g., at patient presentation, at diagnosis,                      | p.5     | p.5     | p.577   | p.6     | p.55    | p.581     |
|                                              | Were predictors assessed blinded for outcome, and for each other                                   | No      | No      | No      | No      | No      | p.582     |
|                                              | Handling of predictors in the modelling (e.g., continuous, linear, non-linear transformation       | Unclear | Unclear | Unclear | Unclear | p.52    | p.582     |
| <b>SAMPLE SIZE</b>                           | Number of participants and number of outcomes/ev                                                   | p.3     | p.2     | p.575   | P.3     | p.55    | p.582     |
|                                              | Number of outcomes/ev ents in relation to the number of candidate predictors (Events Per Variable) | p.5     | p.3     | p.577   | p.20    | p.57    | p.582     |
| <b>MISSING DATA</b>                          | Number of participants with any missing value                                                      | p.4     | Unclear | Unclear | Unclear | Unclear | Unclear   |

|                          |                                                                                                                                                                                                     |                                  |                        |                         |                        |                         |                    |
|--------------------------|-----------------------------------------------------------------------------------------------------------------------------------------------------------------------------------------------------|----------------------------------|------------------------|-------------------------|------------------------|-------------------------|--------------------|
|                          | Number of participants with missing data for each predictor                                                                                                                                         | Unclear                          | Unclear                | Unclear                 | Unclear                | Unclear                 | Unclear            |
|                          | Handling of missing data (e.g., complete-case analysis, imputation, or                                                                                                                              | Unclear                          | Unclear                | Unclear                 | Unclear                | Unclear                 | Unclear            |
| <b>MODEL DEVELOPMENT</b> | Modelling method (e.g., logistic, survival, neural network, or                                                                                                                                      | Simulated cohort model           | Simulated cohort model | Decision analytic model | Simulated cohort model | Decision analytic model | Mathematical model |
|                          | Modelling assumptions satisfied                                                                                                                                                                     | See Appendix 1 in the supplement | p.5                    | p.577                   | p.4                    | p.53                    | p.580              |
|                          | Method for selection of predictors <b>for inclusion</b> in multivariable modelling (e.g., all candidate predictors, pre-selection based on unadjusted association with the                          | Unclear                          | Unclear                | p.577                   | p.4                    | p.53                    | p.581              |
|                          | Method for selection of predictors <b>during multivariable modelling</b> (e.g., full model approach, backward or forward selection) and criteria used (e.g., p-value, Akaike Information Criterion) | Unclear                          | Unclear                | Unclear                 | Unclear                | p.53                    | Unclear            |



|                          |                                                                                                                                                                                                                      |                  |         |         |         |         |         |
|--------------------------|----------------------------------------------------------------------------------------------------------------------------------------------------------------------------------------------------------------------|------------------|---------|---------|---------|---------|---------|
|                          | Shrinkage of predictor weights or regression coefficients (e.g., no shrinkage,                                                                                                                                       | Unclear          | Unclear | Unclear | Unclear | Unclear | Unclear |
| <b>MODEL PERFORMANCE</b> | Calibration (calibration plot, calibration slope, Hosmer-Lemeshow test) and Discrimination (C-statistic, D-statistic, log-rank)                                                                                      | p.5              | Unclear | Unclear | Unclear | Unclear | Unclear |
|                          | Classification measures (e.g., sensitivity, specificity, predictive values, net reclassification improvement) and whether a-priori cut                                                                               | See e-appendix 3 | p.6     | p.577   | p.6     | No      | p.581   |
| <b>MODEL EVALUATION</b>  | Method used for testing model performance: development dataset only (random split of data, resampling methods e.g. bootstrap or cross-validation, none) or separate external validation (e.g. temporal, geographical | See e-appendix 3 | Unclear | Unclear | p.6     | No      | Unclear |

|                |                                                                                                                                                                                                            |         |         |         |         |    |         |
|----------------|------------------------------------------------------------------------------------------------------------------------------------------------------------------------------------------------------------|---------|---------|---------|---------|----|---------|
|                | In case of poor validation, whether model was adjusted or updated (e.g., intercept recalibrated, predictor effects)                                                                                        | Unclear | Unclear | Unclear | Unclear | No | Unclear |
| <b>RESULTS</b> | Final and other multivariable models (e.g., basic, extended, simplified) presented, including predictor weights or regression coefficients, intercept, baseline survival, model performance measures (with | Unclear | Unclear | Unclear | Unclear | No | No      |
|                | Any alternative presentation of the final prediction models, e.g., sum score, nomogram, score chart, predictions for specific risk subgroups                                                               | No      | No      | p.578   | p.23    | No | No      |
|                | Comparison of the distribution of predictors (including missing data) for development and validation                                                                                                       | No      | No      | No      | No      | No | No      |

|                                      |                                                                                                                            |     |     |       |     |      |       |
|--------------------------------------|----------------------------------------------------------------------------------------------------------------------------|-----|-----|-------|-----|------|-------|
| <b>INTERPRETATION AND DISCUSSION</b> | Interpretation of presented models (confirmatory, i.e., model useful for practice versus exploratory, i.e., more research) | p.7 | p.5 | p.577 | p.6 | p.56 | p.583 |
|                                      | Comparison with other studies, discussion of generalizability, strengths and limitations.                                  | p.7 | p.5 | p.577 | p.6 | p.58 | p.583 |

### JBIC critical appraisal checklist for Systematic Reviews and Research Syntheses [26]

| Citation                  | Q1. Is the review question clearly and explicitly stated? | Q2. Were the inclusion criteria appropriate for the review question? | Q3. Was the search strategy appropriate? | Q4. Were the sources and resources used to search for studies adequate? | Q5. Were the criteria for appraising studies appropriate? | Q6. Was critical appraisal conducted by two or more reviewers independently? | Q7. Were there methods to minimize errors in data extraction? | Q8. Were the methods used to combine studies appropriate? | Q9. Was the likelihood of publication bias assessed? | Q10. Were recommendations for policy and/or practice supported by the reported data? | Q11. Were the specific directives for new research appropriate? |
|---------------------------|-----------------------------------------------------------|----------------------------------------------------------------------|------------------------------------------|-------------------------------------------------------------------------|-----------------------------------------------------------|------------------------------------------------------------------------------|---------------------------------------------------------------|-----------------------------------------------------------|------------------------------------------------------|--------------------------------------------------------------------------------------|-----------------------------------------------------------------|
| (Camacho & Shields, 2018) | Yes                                                       | Yes                                                                  | Yes                                      | Yes                                                                     | Yes                                                       | Unclear                                                                      | Yes                                                           | Yes                                                       | Yes                                                  | Yes                                                                                  | Yes                                                             |
| [37]                      | Yes                                                       | Yes                                                                  | Yes                                      | Yes                                                                     | Yes                                                       | Unclear                                                                      | Yes                                                           | Unclear                                                   | Yes                                                  | Yes                                                                                  | Yes                                                             |
| (Moran et al., 2020)      | Yes                                                       | Yes                                                                  | Yes                                      | Yes                                                                     | Yes                                                       | Yes                                                                          | Yes                                                           | Yes                                                       | Yes                                                  | Unclear                                                                              | Yes                                                             |
| (Morrell et al., 2016)    | Yes                                                       | Yes                                                                  | Yes                                      | Yes                                                                     | Yes                                                       | Yes                                                                          | Yes                                                           | Yes                                                       | Yes                                                  | Yes                                                                                  | Yes                                                             |

### JBIC Critical appraisal checklist for randomized controlled trials [27]

| Citation | Q1. Was true randomization used for assignment of participants to treatment groups? | Q2. Was allocation to treatment groups concealed? | Q3. Were treatment groups similar at the baseline? | Q4. Were participants blind to treatment assignment? | Q5. Were those delivering treatment blind to treatment? | Q6. Were outcomes assessed by those blind to treatment? | Q7. Were treatment groups treated identically other than the intervention? | Q8. Was follow-up complete and if not, were differences? | Q9. Were participants analyzed in the groups to which they were assigned? | Q10. Were outcomes measured in the same way for all groups? | Q11. Were outcomes measured in a reliable way? | Q12. Was appropriate statistical analysis used? | Q13. Was the trial design appropriate, and any deviations from the standard? |
|----------|-------------------------------------------------------------------------------------|---------------------------------------------------|----------------------------------------------------|------------------------------------------------------|---------------------------------------------------------|---------------------------------------------------------|----------------------------------------------------------------------------|----------------------------------------------------------|---------------------------------------------------------------------------|-------------------------------------------------------------|------------------------------------------------|-------------------------------------------------|------------------------------------------------------------------------------|
|----------|-------------------------------------------------------------------------------------|---------------------------------------------------|----------------------------------------------------|------------------------------------------------------|---------------------------------------------------------|---------------------------------------------------------|----------------------------------------------------------------------------|----------------------------------------------------------|---------------------------------------------------------------------------|-------------------------------------------------------------|------------------------------------------------|-------------------------------------------------|------------------------------------------------------------------------------|

|      |     |     |     |         |             |             |                           |                                                                               |             |                   |         |     |                                                                                                                |
|------|-----|-----|-----|---------|-------------|-------------|---------------------------|-------------------------------------------------------------------------------|-------------|-------------------|---------|-----|----------------------------------------------------------------------------------------------------------------|
|      |     |     |     |         | assignment? | assignment? | intervention of interest? | between groups in terms of their follow up adequately described and analyzed? | randomized? | treatment groups? |         |     | RCT design (individual randomization, parallel groups) accounted for in the conduct and analysis of the trial? |
| [29] | Yes | Yes | Yes | Unclear | Yes         | Unclear     | Yes                       | Yes                                                                           | No          | Yes               | Unclear | Yes | N/A                                                                                                            |
| [44] | Yes | Yes | Yes | Yes     | Yes         | Unclear     | Yes                       | Yes                                                                           | Yes         | Yes               | Yes     | Yes | Yes                                                                                                            |

**JBICritical Appraisal Checklist for Cohort Studies [28]**

| Citation                   | Q1. Were the two groups similar and recruited from the same population? | Q2. Were the exposures measured similarly to assign people to both exposed and unexposed groups? | Q3. Was the exposure measured in a valid and reliable way? | Q4. Were confounding factors identified? | Q5. Were strategies to deal with confounding factors stated? | Q6. Were the groups/ participants free of the outcome at the start of the study (or at the moment of exposure)? | Q7. Were the outcomes measured in a valid and reliable way? | Q8. Was the follow up time reported and sufficient to be long enough for outcomes to occur? | Q9. Was follow up complete, and if not, were the reasons to loss to follow up described and explored? | Q10. Were strategies to address incomplete follow up utilized? | Q11. Was appropriate statistical analysis used? |
|----------------------------|-------------------------------------------------------------------------|--------------------------------------------------------------------------------------------------|------------------------------------------------------------|------------------------------------------|--------------------------------------------------------------|-----------------------------------------------------------------------------------------------------------------|-------------------------------------------------------------|---------------------------------------------------------------------------------------------|-------------------------------------------------------------------------------------------------------|----------------------------------------------------------------|-------------------------------------------------|
| (Moore Simas et al., 2020) | Yes                                                                     | Yes                                                                                              | Yes                                                        | No                                       | No                                                           | Yes                                                                                                             | Yes                                                         | Yes                                                                                         | Unclear                                                                                               | N/A                                                            | Yes                                             |

**JBICritical Appraisal Checklist for Cross-sectional studies [28]**

| Citation              | Q1. Were the criteria for inclusion in the sample clearly defined? | Q2. Were the study subjects and the setting described in detail? | Q3. Was the exposure measured in a valid and reliable way? | Q4. Were objective, standard criteria used for measurement of the condition? | Q5. Were confounding factors identified? | Q6. Were strategies to deal with confounding factors stated? | Q7. Were the outcomes measured in a valid and reliable way? | Q8. Was appropriate statistical analysis used? |
|-----------------------|--------------------------------------------------------------------|------------------------------------------------------------------|------------------------------------------------------------|------------------------------------------------------------------------------|------------------------------------------|--------------------------------------------------------------|-------------------------------------------------------------|------------------------------------------------|
| Dagher et al., 2012   | Yes                                                                | Yes                                                              | Yes                                                        | Yes                                                                          | No                                       | No                                                           | Yes                                                         | Yes                                            |
| Chojenta et al., 2019 | Yes                                                                | Yes                                                              | Yes                                                        | Yes                                                                          | Yes                                      | Yes                                                          | Yes                                                         | Unclear                                        |
| Ammerman et al., 2016 | Yes                                                                | Yes                                                              | Yes                                                        | Yes                                                                          | Yes                                      | Yes                                                          | Yes                                                         | Yes                                            |
| Roberts et al., 2001  | Yes                                                                | Yes                                                              | Yes                                                        | Yes                                                                          | No                                       | N/A                                                          | Yes                                                         | Yes                                            |

## Abbreviations

| Abbreviation        | Full                                                                 | Aspect            |
|---------------------|----------------------------------------------------------------------|-------------------|
| ANOVA               | Analysis of Variance                                                 | Analysis          |
| ANRQ-R              | Antenatal Risk Questionnaire                                         | Tool              |
| CATi                | Computer Assisted Telephone Interviews                               | Research          |
| CBA                 | Cognitive Behavioural Approach                                       | Intervention      |
| CBT                 | Cognitive Behavioural Therapy                                        | Intervention      |
| CEA                 | Cost Effectiveness Analysis                                          | Analysis          |
| CIDI                | Composite International Diagnostic Interview                         | Research          |
| CUA                 | Cost Utility Analysis                                                | Analysis          |
| DASS21              | Depression, Anxiety and Stress Scale                                 | Tool              |
| DCS                 | Depression Care Specialist                                           | Staff             |
| DFD                 | Disease Free Day                                                     | Research          |
| DSM-IV              | Diagnostic and Statistical Manual for Mental Disorders 4th Edition   | Source            |
| eMBI                | electronic Mindfulness-based Intervention                            | Intervention      |
| EPDS                | Edinburgh Postnatal Depression Scale                                 | Tool              |
| ePRO                | electronic Patient Reported Outcomes                                 | Research          |
| EQ-5D-3L            | EuroQol 5 Dimension 3 Level                                          | Tool              |
| GP                  | General Practitioner                                                 | Staff             |
| gCBT                | Group cognitive behavioural therapy                                  | Intervention      |
| HRU                 | Healthcare resource utilization                                      | Analysis          |
| HV                  | Health Visitor                                                       | Staff             |
| ICD                 | International Classification of Diseases                             | Source            |
| ICER                | Incremental Cost-Effectiveness Ratio                                 | Analysis          |
| IG                  | Intervention Group                                                   | Research          |
| IPT                 | Interpersonal psychotherapy                                          | Intervention      |
| ITT                 | Intention to Treat                                                   | Research          |
| LGA                 | Local Government Area                                                | Organisation      |
| MBS                 | Medical Benefits Schedule                                            | Source            |
| MCH                 | Maternal and Child Health                                            | Setting           |
| MFAS                | Maternal-Fetal Attachment Scale                                      | Tool              |
| MOMcare             |                                                                      | <i>Study name</i> |
| MINI                | Mini-International Neuropsychiatric Interview                        | Tool              |
| NHS                 | National Health Service                                              | Setting           |
| OOP                 | Out of Pocket                                                        | Research          |
| PAD                 | perinatal anxiety and/or depression                                  | Diagnosis         |
| PBS                 | Pharmaceutical Benefits Scheme                                       | Source            |
| PCA                 | Personalised Care Approach                                           | Intervention      |
| PHQ-9               | Patient Health Questionnaire                                         | Tool              |
| PND                 | Postnatal depression                                                 | Diagnosis         |
| PND                 | Post-partum depression                                               | Diagnosis         |
| <i>PoNDER trial</i> | <b>POstNatal Depression Economic evaluation and Randomised trial</b> | <i>Study name</i> |
| PRAQ-R              | Pregnancy-Related Anxiety Questionnaire                              | Tool              |
| PTSD                | Post-Traumatic Stress Disorder                                       | Diagnosis         |
| QALY                | Quality Adjusted Life Year                                           | Analysis          |

|        |                                                                  |              |
|--------|------------------------------------------------------------------|--------------|
| RCT    | Randomised controlled trial                                      | Research     |
| SCL-20 | Hopkins Symptom Checklist-20                                     | Tool         |
| SF36   | Short-Form 36                                                    | Tool         |
| SIDS   | Sudden infant death syndrome                                     | Diagnosis    |
| SPARCS | <i>Sleep, Parenting and Relationships in a Community Setting</i> | Study name   |
| STAI   | State-Trait Anxiety Questionnaire                                | Tool         |
| TAU    | Treatment as Usual                                               | Research     |
| TENS   | Transcutaneous Electrical Nerve Stimulation                      | Intervention |
| WHO    | World Health Organisation                                        | Organisation |
| WWWT   | What Were We Thinking                                            | Tool         |

For peer review only

### Data extraction table for studies including perinatal anxiety

| Citation (Country)                                                   | Study Details                                                                                                                                                                                                                                                                                                                                                                                                                                                                                                                                                  | Participants and setting                                                                                                                                                                                                                                                                                                                                                                                                                                      | Key findings                                                                                                                                                                                                                                                                                                                                                                                                                                                                                                                                                                                                                                                                                                                                                                                                                                                                                                                                                                                                                  | Observations                                                                                                                                                                                                                                                                                                                                                                                                                                                                                                                                                                                                                                                                                                                                                                                                                    |
|----------------------------------------------------------------------|----------------------------------------------------------------------------------------------------------------------------------------------------------------------------------------------------------------------------------------------------------------------------------------------------------------------------------------------------------------------------------------------------------------------------------------------------------------------------------------------------------------------------------------------------------------|---------------------------------------------------------------------------------------------------------------------------------------------------------------------------------------------------------------------------------------------------------------------------------------------------------------------------------------------------------------------------------------------------------------------------------------------------------------|-------------------------------------------------------------------------------------------------------------------------------------------------------------------------------------------------------------------------------------------------------------------------------------------------------------------------------------------------------------------------------------------------------------------------------------------------------------------------------------------------------------------------------------------------------------------------------------------------------------------------------------------------------------------------------------------------------------------------------------------------------------------------------------------------------------------------------------------------------------------------------------------------------------------------------------------------------------------------------------------------------------------------------|---------------------------------------------------------------------------------------------------------------------------------------------------------------------------------------------------------------------------------------------------------------------------------------------------------------------------------------------------------------------------------------------------------------------------------------------------------------------------------------------------------------------------------------------------------------------------------------------------------------------------------------------------------------------------------------------------------------------------------------------------------------------------------------------------------------------------------|
| Ride et al (2016)<br><br>(Ride et al., 2016)<br><br><b>Australia</b> | <p><b>Study Design:</b> Economic evaluation, including cost-effectiveness and cost-utility analyses, conducted alongside a cluster-randomised trial</p> <p><b>Type of intervention [exposure]:</b> What Were We Thinking (WWWT) - a psychoeducational intervention targeted at the partner relationship, management of infant behaviour and parental fatigue.</p> <p><b>Data collection methods:</b> Data were collected from participants via computer-assisted telephone interview at baseline (6 weeks postpartum) and follow-up (26 weeks postpartum).</p> | <p><b>Sample size:</b> 359</p> <p><b>Participants:</b> English-speaking first-time mothers who had recently given birth and attended participating Maternal and Child Health Centres (MCHCs)</p> <p><b>Setting:</b> 48 Maternal and Child Health Centres in Victoria, Australia.</p> <p><b>Dates of data collection:</b> Baseline interviews took place between May 2013 and April 2014, and follow-up interviews between September 2013 and August 2014.</p> | <p><b>Primary Findings:</b><br/>The intervention was estimated to cost \$A118.16 per participant. The analysis showed no statistically significant difference between the intervention and control groups in costs or outcomes. The incremental cost-effectiveness ratios were \$A36 451 per QALY gained and \$A152 per percentage point reduction in 30-day prevalence of depression, anxiety, and adjustment disorders. The estimate lies under the unofficial cost-effectiveness threshold of \$A55 000 per QALY; however, there was considerable uncertainty surrounding the results, with a 55% probability that WWWT would be considered cost-effective at that threshold.</p> <p><b>Additional Findings:</b><br/>The results suggest that, although WWWT shows promise as a preventive intervention for postnatal maternal mental health problems, further research is required to reduce the uncertainty over its cost-effectiveness as there were no statistically significant differences in costs or outcomes.</p> | <p>Ride et al (2016) investigated the cost-effectiveness of the What Were We Thinking (WWWT) intervention, for the prevention of postnatal maternal mental health problems. The intervention was estimated to cost \$A118.16 per participant. The analysis showed no statistically significant difference between the intervention and control groups in costs or outcomes. The incremental cost-effectiveness ratios were \$A36 451 per QALY gained and \$A152 per percentage point reduction in 30-day prevalence of depression, anxiety, and adjustment disorders. The estimate lies under the unofficial cost-effectiveness threshold of \$A55 000 per QALY; however, there was considerable uncertainty surrounding the results, with a 55% probability that WWWT would be considered cost-effective at that threshold</p> |

## Data extraction table for studies including maternal depression

| Citation (Country)                                      | Study Details                                                                                                                                                                                                                                                                                                                                                                                                                                                                                                                                                  | Participants and setting                                                                                                                                                                                                                          | Key findings                                                                                                                                                                                                                                                                                                                                                                                                                                                                                                                                                      | Observations                                                                                                                                                                                                                                                                                                                                                                                    |
|---------------------------------------------------------|----------------------------------------------------------------------------------------------------------------------------------------------------------------------------------------------------------------------------------------------------------------------------------------------------------------------------------------------------------------------------------------------------------------------------------------------------------------------------------------------------------------------------------------------------------------|---------------------------------------------------------------------------------------------------------------------------------------------------------------------------------------------------------------------------------------------------|-------------------------------------------------------------------------------------------------------------------------------------------------------------------------------------------------------------------------------------------------------------------------------------------------------------------------------------------------------------------------------------------------------------------------------------------------------------------------------------------------------------------------------------------------------------------|-------------------------------------------------------------------------------------------------------------------------------------------------------------------------------------------------------------------------------------------------------------------------------------------------------------------------------------------------------------------------------------------------|
| Ammerman et al (2016)<br>(Ammerman et al., 2016)<br>USA | <b>Study design:</b> Cross-sectional<br><br><b>Data collection methods:</b> MEPS database, a subset of the National Health Interview Survey (NHIS) that includes information on health care utilisation and expenditures for the civilian, non-institutionalised population in the USA.                                                                                                                                                                                                                                                                        | <b>Sample size:</b> 20,531<br><br><b>Participants:</b> 2,310 high-risk mothers with depression and 18,221 high-risk mothers without depression<br><br><b>Setting:</b> USA healthcare setting<br><br><b>Dates of data collection:</b> 1996 to 2011 | <b>Primary findings:</b><br>Depressed mothers were more likely to incur insurer (0.88 vs. 0.80) and out of pocket expenses (0.86 vs. 0.77) and to have higher insurer expenses (\$4916 vs. \$3521) and out of pocket expenses (\$786 vs. \$522) (in 2015).<br><b>Additional findings:</b><br>A higher proportion of the depressed sample was Caucasian which were in relatively worse health than women from other ethnic groups. The depressed sample was more likely to have public insurance, to be English-speaking and to have a usual health care provider. | The cross-sectional study from Ammerman et al (2016) the USA conducted between 2006 and 2011 investigated the out-of-pocket expenses and insurer expenses of depressed vs non-depressed mothers. Depressed mothers were more likely to incur insurer and out of pocket expenses and to have higher insurer expenses (\$4916 vs. \$3521) and out of pocket expenses (\$786 vs. \$522) (in 2015). |
| Bauer et al (2015)<br>(Bauer et al., 2015)<br>UK        | <b>Study Design:</b> The economic analysis takes a life-course perspective from the viewpoints of the public sector, individual and society. The study analysed the effects of perinatal depression on child development outcomes of children at ages 11 and 16 years from the community-based South London Child Development Study. Economic consequences were attached to those outcomes through simple decision-analytic techniques, building on evidence from studies of epidemiology, health-related quality of life, public sector costs and employment. | <b>Sample size:</b> 120<br><br><b>Participants:</b> Mothers and children<br><br><b>Setting:</b> Two antenatal clinics in the UK<br><br><b>Dates of data collection:</b> January to December 1986                                                  | <b>Primary Findings:</b><br>Additional risks that children exposed to perinatal depression develop emotional, behavioural, or cognitive problems ranged from 5% to 21%. In addition, there was a high risk (24%) that children would have special educational needs.<br><br>For each child exposed to perinatal depression, public sector costs exceeded £3,030, costs due to reduced earnings were £1,400 and health-related quality of life loss was valued at £3,760.                                                                                          | The study examined some of the outcomes and long-term economic implications experienced by offspring who have been exposed to perinatal depression.                                                                                                                                                                                                                                             |
| Counts et al (2022)<br>(Counts et al., 2022)<br>USA     | <b>Study Design:</b> Modelling study. A decision analytic model used a simulated cohort of 1,000 Medicaid-enrolled pregnant individuals. Health care costs for individuals receiving postpartum depression preventive intervention or not, over 1 or 5 years postpartum, in a variety of scenarios, including varying rates of Medicaid churn (i.e., transitions to a new Medicaid managed care plan, commercial insurance plan, or loss of coverage) were                                                                                                     | <b>Sample size:</b> 1,000<br><br><b>Participants:</b> simulated cohort of 1,000 Medicaid enrolled pregnant individuals<br><br><b>Setting:</b> USA healthcare system.                                                                              | <b>Primary Findings:</b><br>The main outcome was the amount of clinician incentive shared in a Value-based payment (VBP) model from providing preventive interventions. The likelihood of the health care payer realising a positive return on investment if it shared 50% of 5-year                                                                                                                                                                                                                                                                              | This economic modelling study found that providing preventive interventions for PND resulted in an estimated 5-year saving of £602 <sup>□</sup>                                                                                                                                                                                                                                                 |



1  
2  
3  
4  
5  
6  
7  
8  
9  
10  
11  
12  
13  
14  
15  
16  
17  
18  
19  
20  
21  
22  
23  
24  
25  
26  
27  
28  
29  
30  
31  
32  
33  
34  
35  
36  
37  
38  
39  
40  
41  
42  
43  
44  
45  
46

|                                                                       |                                                                                                                                                                                                                                                                                                     |                                                                                                                                                                                                                                                                       |                                                                                                                                                                                                                                                                                                                                                                                                                                                                                                                                                                                                                                                                                                                                                                                                                                                                                                                                                                                        |                                                                                                                                                                                                                                                                                                                                                                                                                                                                                                                                           |
|-----------------------------------------------------------------------|-----------------------------------------------------------------------------------------------------------------------------------------------------------------------------------------------------------------------------------------------------------------------------------------------------|-----------------------------------------------------------------------------------------------------------------------------------------------------------------------------------------------------------------------------------------------------------------------|----------------------------------------------------------------------------------------------------------------------------------------------------------------------------------------------------------------------------------------------------------------------------------------------------------------------------------------------------------------------------------------------------------------------------------------------------------------------------------------------------------------------------------------------------------------------------------------------------------------------------------------------------------------------------------------------------------------------------------------------------------------------------------------------------------------------------------------------------------------------------------------------------------------------------------------------------------------------------------------|-------------------------------------------------------------------------------------------------------------------------------------------------------------------------------------------------------------------------------------------------------------------------------------------------------------------------------------------------------------------------------------------------------------------------------------------------------------------------------------------------------------------------------------------|
|                                                                       | <p>estimated for the period 2020 to 2025. The model was developed between March 5 2021 and July 30 2021.</p> <p><b>Type of intervention [exposure]:</b> Individual counselling and group-based counselling.</p> <p><b>Data collection methods:</b> Simulation based on collected Medicaid data.</p> | <p><b>Dates of data collection:</b> Model developed between March 5 2021 and July 30 2021.</p>                                                                                                                                                                        | <p>expected savings with a clinician up front was also measured.</p> <p>The simulated cohort was designed to be reflective of the demographics characteristics of pregnant individuals receiving Medicaid; however, no specific demographic features were simulated. Providing preventive interventions for postpartum depression resulted in an estimated 5-year savings of \$734.12 (95% credible interval [CrI], \$217.21-\$1235.67) per person. Without health insurance churn, sharing 50% of 5-year expected savings could offer more than double the financial incentives for clinicians to prevent postpartum depression compared with traditional VBP (\$367.06 [95% CrI, \$108.61-\$617.83] vs \$177.74 [95% CrI, \$52.66-\$296.60], respectively), with a high likelihood of positive return for the health care payer (91%). As health insurance churn increased, clinician incentives from sharing estimated savings decreased (73% reduction with 50% annual churn).</p> |                                                                                                                                                                                                                                                                                                                                                                                                                                                                                                                                           |
| <p>Dagher et al (2012)<br/><br/>(Dagher et al., 2012<br/><br/>USA</p> | <p><b>Study design:</b> Cross-sectional</p> <p><b>Data collection methods:</b> Prices of service use and EPDS</p>                                                                                                                                                                                   | <p><b>Sample size:</b> 638 women.</p> <p><b>Participants:</b> Women receiving maternal healthcare services, from hospital discharge to 11 weeks postpartum.</p> <p><b>Setting:</b> USA healthcare setting.</p> <p><b>Dates of data collection:</b> The year 2001.</p> | <p><b>Primary findings:</b><br/>The total cost of all mental health counselling visits for the depressed group n =31 was \$138 and the cost for the non-depressed group n= 607 was \$13. This was a statistically significant difference (p &lt; 0.001).</p> <p><b>Additional findings:</b> The total cost of emergency department visits for the postpartum women was \$84 for the depressed group n = 31 and \$13 for the non-depressed group n = 607. This was a statistically significant difference (p &lt; 0.001).</p>                                                                                                                                                                                                                                                                                                                                                                                                                                                           | <p>The Dagher et al., (2012) cross-sectional study from the USA investigated expenditure from health care service from discharge until 11 weeks postpartum. There was a significant difference in healthcare expenditure between depressed and non-depressed women. The EPDS was used to measure depression. The total cost of all mental health counselling visits for the depressed group n =31 was \$138 and the cost for the non-depressed group n= 607 was \$13. This was a statistically significant difference (p &lt; 0.001).</p> |

|                                                                    |                                                                                                                                                                                                                                                                                                                                                                                                                                                                                                      |                                                                                                                                                                                                                                                                                                                                                                  |                                                                                                                                                                                                                                                                                                                                                                                                                                                                                                                                                                                                                                                                                                                                                                                                                                                                                        |                                                                                                                                                                                                                                                                                                                                                                                                                                                                                                                                                                                                                                                                                                                                                             |
|--------------------------------------------------------------------|------------------------------------------------------------------------------------------------------------------------------------------------------------------------------------------------------------------------------------------------------------------------------------------------------------------------------------------------------------------------------------------------------------------------------------------------------------------------------------------------------|------------------------------------------------------------------------------------------------------------------------------------------------------------------------------------------------------------------------------------------------------------------------------------------------------------------------------------------------------------------|----------------------------------------------------------------------------------------------------------------------------------------------------------------------------------------------------------------------------------------------------------------------------------------------------------------------------------------------------------------------------------------------------------------------------------------------------------------------------------------------------------------------------------------------------------------------------------------------------------------------------------------------------------------------------------------------------------------------------------------------------------------------------------------------------------------------------------------------------------------------------------------|-------------------------------------------------------------------------------------------------------------------------------------------------------------------------------------------------------------------------------------------------------------------------------------------------------------------------------------------------------------------------------------------------------------------------------------------------------------------------------------------------------------------------------------------------------------------------------------------------------------------------------------------------------------------------------------------------------------------------------------------------------------|
| <p>Franta et al (2022)</p> <p>(Franta et al., 2022)</p> <p>USA</p> | <p><b>Study Design:</b> Modelling study</p> <p><b>Type of intervention [exposure]:</b> Comparison of outcomes in pregnant adolescents who received versus did not receive counselling interventions</p> <p><b>Data collection methods:</b> Decision-analytic model using TreeAge Pro software</p>                                                                                                                                                                                                    | <p><b>Sample size:</b> Theoretical cohort of 180,000 individuals</p> <p><b>Participants:</b> pregnant adolescents</p> <p><b>Setting:</b> Obstetric setting</p> <p><b>Dates of data collection:</b> 2018</p>                                                                                                                                                      | <p><b>Primary Findings:</b></p> <ul style="list-style-type: none"> <li>A strategy of referral to counselling interventions was cost effective in the theoretical cohort, with 8,935 fewer cases of perinatal depression, 1,606 fewer cases of chronic depression, 166 fewer preterm deliveries, 4 fewer neonatal deaths, 1 fewer case of cerebral palsy, 20 fewer cases of SIDS. In total, there were 21,976 additional QALYs and cost savings of \$223,549,872, making it the dominant strategy (better outcomes with lower costs).</li> <li>Counselling interventions remained cost saving until the annual direct and indirect cost of chronic, severe depression was set below \$30,000, at which point it became cost effective (baseline input: \$182,309).</li> <li>It is cost effective to refer all pregnant adolescents for preventive counselling interventions.</li> </ul> | <p>Using a theoretical cohort, Franta et al. (2022) found that counselling was a cost-effective preventative measure, leading to fewer cases of perinatal and chronic depression</p>                                                                                                                                                                                                                                                                                                                                                                                                                                                                                                                                                                        |
| <p>Grote et al (2017)</p> <p>Grote et al., 2017)</p> <p>USA</p>    | <p><b>Study Design:</b> RCT, cost-benefit study</p> <p><b>Type of intervention [exposure]:</b> 18 months MOMCare collaborative care depression intervention (choice of brief interpersonal psychotherapy or pharmacotherapy or both) with enhanced maternity support services (MSS-Plus).</p> <p><b>Data collection methods:</b> Blinded telephone assessments, including depression severity on SCL-20. Unit costs of MOMCare intervention actual salary rate + fringe benefits + 30% overheads</p> | <p><b>Sample size:</b> 152</p> <p><b>Participants:</b> 152 pregnant women 12-32 wks. gestation with probable major depression or dysthymia (PTSD). Plus 12 excluded from analysis due to missing final data.</p> <p><b>Setting:</b> 10 county public health centres</p> <p><b>Dates of data collection:</b> Recruited Jan 2010 – July 2012. Study ended 2014</p> | <p><b>Primary Findings:</b> when controlled for baseline depression severity, women with probable depression and PTSD in MOMCare had 68 more depression-free days over 18 months than those in MSS-Plus (p,.05). Additional \$1,312. depression care cost per MOMCare participant with comorbid PTSD. Incremental net benefit of MOMCare was positive if a depression free days was valued at <math>\geq</math> \$20</p> <p><b>Additional Findings:</b><br/>Unit costs used 2013:<br/>\$80 per 45-50 min depression care specialist (DCS) visit<br/>\$31 per 20-30 min DCS phone call (Both included time for outreach efforts and record keeping)<br/>\$247 fixed cost per patient for caseload supervision and info support<br/>Other references to US-based data sources</p>                                                                                                        | <p>In this RCT, cost-benefit study, a multicomponent collaborative care intervention for depression (MOMcare - a choice of brief interpersonal psychotherapy or pharmacotherapy or both) with enhanced maternity support services (MSS-Plus) in the public health system of Seattle, USA. The incremental benefit and cost and the net benefit for women with major depression and PTSD was estimated. When controlled for baseline depression severity, women with probable depression and PTSD in MOMCare had 68 more depression-free days over 18 months than those in MSS-Plus (p&lt;.05). There was an additional £1,943** depression care cost per MOMCare participant with comorbid PTSD. The incremental net benefit of MOMCare was positive if</p> |

|                                                                   |                                                                                                                                                                                                                                                                                                                                                                                                                                                                                                           |                                                                                                                                                                                                                                                                                                                                                                         |                                                                                                                                                                                                                                                                                                                                                                                                                                                                                                                                                                     |                                                                                                                                                                                                                                           |
|-------------------------------------------------------------------|-----------------------------------------------------------------------------------------------------------------------------------------------------------------------------------------------------------------------------------------------------------------------------------------------------------------------------------------------------------------------------------------------------------------------------------------------------------------------------------------------------------|-------------------------------------------------------------------------------------------------------------------------------------------------------------------------------------------------------------------------------------------------------------------------------------------------------------------------------------------------------------------------|---------------------------------------------------------------------------------------------------------------------------------------------------------------------------------------------------------------------------------------------------------------------------------------------------------------------------------------------------------------------------------------------------------------------------------------------------------------------------------------------------------------------------------------------------------------------|-------------------------------------------------------------------------------------------------------------------------------------------------------------------------------------------------------------------------------------------|
|                                                                   |                                                                                                                                                                                                                                                                                                                                                                                                                                                                                                           |                                                                                                                                                                                                                                                                                                                                                                         |                                                                                                                                                                                                                                                                                                                                                                                                                                                                                                                                                                     | depression free days was valued below £18 <sup>1</sup> . For women with probable major depression and PTSD, MOMCare had a significant clinical benefit over MSS-Plus, with only a moderate increase in health services cost. <sup>1</sup> |
| Henderson et al (2019)<br>(Henderson et al., 2019)<br><br>UK      | <b>Study Design:</b> PONDER Cluster RCT<br><br><b>Type of intervention [exposure]:</b> GP practices assigned to usual health visitor (HV) care, HV trained to assess for PND plus offering either a CBA or a person-centred approach (PCA) weekly for 8 weeks<br><br><b>Data collection methods:</b> Postal questionnaires: Baseline including EPDS and SF36 at 6 weeks, Postnatal questionnaires at 6, 12 and 18 months postnatal. Resource use logs were completed by HVs based on their and GP records | <b>Sample size:</b> From 101 GP practices, 4,084 participants consented, baseline data from 3,449 participants.<br><br><b>Participants:</b> 2,241 lower risk women completed EPDS at 6 months – 767 control, 1,474 intervention. 1,459 women provided economic data.<br><br><b>Setting:</b> GP practices<br><br><b>Dates of data collection:</b> April 2003 for 3 years | <b>Primary Findings:</b> 99% probability of cost effectiveness at £20,000 at 6 months postnatal<br>Compared with controls, adjusted 6 months costs were £82 lower with the interventions<br><br><b>Additional Findings:</b><br>Little difference CBA to PCA – CBA marginally higher probability of being cost effective.                                                                                                                                                                                                                                            | This study found that CBT had a marginally higher probability of being cost-effective than a person-centred approach.                                                                                                                     |
| Moore Simas et al (2020)<br>(Moore Simas et al., 2020)<br><br>USA | <b>Study Design:</b> Cohort study<br><br><b>Type of intervention [exposure]:</b> PND.<br><br><b>Data collection methods:</b> Administrative claims data from the IBM Watson Health MarketScan Databases                                                                                                                                                                                                                                                                                                   | <b>Sample size:</b> 135,678<br><br><b>Participants:</b> mother-child pairs with and without postpartum depression (PND) exposure<br><br><b>Setting:</b> USA healthcare setting.<br><br><b>Dates of data collection:</b> 2010 to 2016                                                                                                                                    | <b>Primary Findings:</b><br><ul style="list-style-type: none"> <li>• 33,314 mother-child pairs with PND exposure were propensity score matched to 102,364 mother-child pairs without PND exposure.</li> <li>• During the 24-month follow-up period, HRU across most service categories was significantly higher among children in the PND exposure cohort than non-PND exposure cohort.</li> <li>• Among outpatient services, the percentages of children with a physician specialist service (68% versus 64%), early-intervention screening (40% versus</li> </ul> | This cohort study assessed healthcare resource utilisation (HRU) and costs in children of mothers with and without PND                                                                                                                    |

1 <sup>1</sup> Prices have been inflated and converted to GBP [53].

|                                                                              |                                                                                                                                                                                                                                                                                                                                                                                                                                                                                                                                                                                                                                                                                                                                                                                      |                                                                                                                                                                                                                     |                                                                                                                                                                                                                                                                                                                                                                                                                                                                                                                                                                                                                                                                                                                                                                                                                                                                                                                                    |                                                                                                                                          |
|------------------------------------------------------------------------------|--------------------------------------------------------------------------------------------------------------------------------------------------------------------------------------------------------------------------------------------------------------------------------------------------------------------------------------------------------------------------------------------------------------------------------------------------------------------------------------------------------------------------------------------------------------------------------------------------------------------------------------------------------------------------------------------------------------------------------------------------------------------------------------|---------------------------------------------------------------------------------------------------------------------------------------------------------------------------------------------------------------------|------------------------------------------------------------------------------------------------------------------------------------------------------------------------------------------------------------------------------------------------------------------------------------------------------------------------------------------------------------------------------------------------------------------------------------------------------------------------------------------------------------------------------------------------------------------------------------------------------------------------------------------------------------------------------------------------------------------------------------------------------------------------------------------------------------------------------------------------------------------------------------------------------------------------------------|------------------------------------------------------------------------------------------------------------------------------------------|
|                                                                              |                                                                                                                                                                                                                                                                                                                                                                                                                                                                                                                                                                                                                                                                                                                                                                                      |                                                                                                                                                                                                                     | <p>37%), and an emergency room visit (48% versus 42%) were greater in children of mothers with PND (all <math>p &lt; .001</math>).</p> <ul style="list-style-type: none"> <li>• Furthermore, children of mothers with PND incurred 12% higher total healthcare costs in the first 24 months of life compared to children of mothers without PND (\$24,572 versus \$21,946; <math>p &lt; .001</math>).</li> <li>• After excluding mothers with preterm delivery, the proportion of children with ER visits, physician specialist services, and outpatient pharmacy claims was significantly higher in the PND exposure cohort than non-PND exposure cohort (all <math>p &lt; .001</math>).</li> </ul> <p><b>Additional Findings:</b><br/>The results of this analysis suggest that HRU and costs over the first 24 months of life in children of mothers with PND exceeded that of children of mothers without evidence of PND.</p> |                                                                                                                                          |
| <p>Petrou et al (2002)<br/><br/>(Petrou et al., 2002)<br/><br/><b>UK</b></p> | <p><b>Study Design:</b> Economic evaluation in which unit costs were applied to resource-use data collected alongside a longitudinal study of women at high risk of developing PND. Unit costs were applied to estimates of health and social care resource use made by 206 women recruited from antenatal clinics and their infants. Net costs per mother-infant dyad over the first 18 months post-partum were estimated.</p> <p><b>Type of intervention [exposure]:</b><br/>Preventative PND intervention.</p> <p><b>Data collection methods:</b> primiparous women attending antenatal clinics at 26–28 weeks of gestation were screened using a predictive index for PND. Women identified as being at high risk of developing PND were entered into an RCT of a preventive</p> | <p><b>Sample size:</b> 206</p> <p><b>Participants:</b> Primiparous women at high risk of developing PND</p> <p><b>Setting:</b> antenatal clinics</p> <p><b>Dates of data collection:</b> May 1997 to April 1999</p> | <p><b>Primary Findings:</b><br/>Mean mother-infant dyad costs were estimated at £2,419.00 for women with PND and £2026.90 for women without PND, a mean cost difference of £392.10 (<math>P=0.17</math>). The mean cost differences between women with and without PND reached statistical significance for community care services (<math>P=0.01</math>), but not for other categories of service. Economic costs were higher for women with extended experiences of the condition.</p>                                                                                                                                                                                                                                                                                                                                                                                                                                           | <p>Aimed to estimate the economic costs of PND in a geographically defined cohort of women at high risk of developing the condition.</p> |

|                                                                   |                                                                                                                                                                                                                                                                                                                                                                                                                                                                          |                                                                                                                                                                                                                                                                                                                                           |                                                                                                                                                                                                                                                                                                                                                                                                                                                                                                                                                                                                                                                                                                                                                                                                                                                                                                                                                                                                                                                                                                                                                                                       |                                                                                                                                                                                                                                                                                                |
|-------------------------------------------------------------------|--------------------------------------------------------------------------------------------------------------------------------------------------------------------------------------------------------------------------------------------------------------------------------------------------------------------------------------------------------------------------------------------------------------------------------------------------------------------------|-------------------------------------------------------------------------------------------------------------------------------------------------------------------------------------------------------------------------------------------------------------------------------------------------------------------------------------------|---------------------------------------------------------------------------------------------------------------------------------------------------------------------------------------------------------------------------------------------------------------------------------------------------------------------------------------------------------------------------------------------------------------------------------------------------------------------------------------------------------------------------------------------------------------------------------------------------------------------------------------------------------------------------------------------------------------------------------------------------------------------------------------------------------------------------------------------------------------------------------------------------------------------------------------------------------------------------------------------------------------------------------------------------------------------------------------------------------------------------------------------------------------------------------------|------------------------------------------------------------------------------------------------------------------------------------------------------------------------------------------------------------------------------------------------------------------------------------------------|
|                                                                   | intervention for PND delivered by trained health visitors. Economic data of women in the trial and in the observational study were pooled. An independent researcher assessed the mental state of all women at 8 weeks, 18 weeks, 12 months, and 18 months post-partum using the Structured Clinical Interview for DSM-III-R diagnoses (SCID-II).                                                                                                                        |                                                                                                                                                                                                                                                                                                                                           |                                                                                                                                                                                                                                                                                                                                                                                                                                                                                                                                                                                                                                                                                                                                                                                                                                                                                                                                                                                                                                                                                                                                                                                       |                                                                                                                                                                                                                                                                                                |
| Petrou et al (2006)<br><br>(Petrou et al., 2006)<br><br><b>UK</b> | <p><b>Study Design</b> A prospective economic evaluation was conducted alongside a pragmatic RCT</p> <p><b>Type of intervention [exposure]:</b> psychosocial and psychological interventions including counselling for the prevention of PND.</p> <p><b>Data collection methods:</b> Data on health and social care use by women and their infants up to 18 months postpartum were collected, using a combination of prospective diaries and face-to-face interviews</p> | <p><b>Sample size:</b> 151 women</p> <p><b>Participants:</b> Women considered at high risk of developing PND were allocated randomly to the preventive intervention (<math>n = 74</math>) or to routine primary care (<math>n = 77</math>)</p> <p><b>Setting:</b> Health care setting.</p> <p><b>Dates of data collection:</b> c.2000</p> | <p><b>Primary Findings:</b></p> <ul style="list-style-type: none"> <li>Women in the preventive intervention group were depressed for an average of 2.21 months (9.57 weeks) during the study period, whereas women in the routine primary care group were depressed for an average of 2.70 months (11.71 weeks).</li> <li>The mean health and social care costs were estimated at £2,396.9 per mother–infant dyad in the preventive intervention group and £2,277.5 per mother–infant dyad in the routine primary care group, providing a mean cost difference of £119.5 (bootstrap 95 percent confidence interval [CI], –535.4, 784.9).</li> <li>At a willingness to pay threshold of £1,000 per month of PND avoided, the probability that the preventive intervention is cost-effective is .71 and the mean net benefit is £383.4 (bootstrap 95 percent CI, –£863.3–£1,581.5).</li> </ul> <p><b>Additional Findings:</b><br/>The preventive intervention is likely to be cost-effective even at relatively low willingness to pay thresholds for preventing 1 month of PND during the first 18 months postpartum. Given the negative impact of PND on later child development.</p> | This cost-effectiveness analysis found that given the negative impact of PND on later child development, preventive interventions are likely to be cost-effective even at relatively low willingness to pay thresholds for preventing one month of PND during the first 18 months post-partum. |
| Roberts et al (2001) [42]                                         | <p><b>Study design:</b> Cross-sectional</p> <p><b>Data collection methods:</b> EPDS and the Health and Social Service Utilization Questionnaire (HSUQ)</p>                                                                                                                                                                                                                                                                                                               | <p><b>Sample size:</b> 1,250</p> <p><b>Participants:</b> mothers of infants.</p>                                                                                                                                                                                                                                                          | <p><b>Primary findings:</b><br/>Costs were notably different for mothers with and without depression as determined by the EPDS (score of &gt; 12). The total cost for health and social care \$845 for mothers with</p>                                                                                                                                                                                                                                                                                                                                                                                                                                                                                                                                                                                                                                                                                                                                                                                                                                                                                                                                                               | A cross-sectional study of 1250 mothers of infants in a Canadian setting used the EPDS to investigate the costs associated with perinatal depression. It was found that                                                                                                                        |

|                                                            |                                                                                                                                                                                                                                                             |                                                                                                                                                                                                                                                                                                                                                                                                                 |                                                                                                                                                                                                                                                                                                                                                                                                                                                                                                                                                                                                                                                                                                                                                                                                                                                     |                                                                                                                                                                                                                                                                                                           |
|------------------------------------------------------------|-------------------------------------------------------------------------------------------------------------------------------------------------------------------------------------------------------------------------------------------------------------|-----------------------------------------------------------------------------------------------------------------------------------------------------------------------------------------------------------------------------------------------------------------------------------------------------------------------------------------------------------------------------------------------------------------|-----------------------------------------------------------------------------------------------------------------------------------------------------------------------------------------------------------------------------------------------------------------------------------------------------------------------------------------------------------------------------------------------------------------------------------------------------------------------------------------------------------------------------------------------------------------------------------------------------------------------------------------------------------------------------------------------------------------------------------------------------------------------------------------------------------------------------------------------------|-----------------------------------------------------------------------------------------------------------------------------------------------------------------------------------------------------------------------------------------------------------------------------------------------------------|
| Canada                                                     |                                                                                                                                                                                                                                                             | <p><b>Setting:</b> Canadian healthcare setting</p> <p><b>Dates of data collection:</b> 1999</p>                                                                                                                                                                                                                                                                                                                 | <p>depression and their infant's vs \$413 for those with lower scores. This was statistically significant difference at the (<math>p &lt; .01</math>).</p> <p><b>Additional findings:</b><br/>Costs for social work visits were higher for mothers with depression and mothers with low incomes.<br/>Total health and social care costs were double for mothers with family income below \$20,000 (\$788 v \$399) and for mothers with clinical depression (\$845 v \$413). Nursing care costs were greater for mothers with high depression scores (\$135 v \$81).</p>                                                                                                                                                                                                                                                                             | <p>costs were notably different for mothers with and without depression. The total cost for health and social care was \$845 for mothers with depression and their infant's vs \$413 for those with lower depression scores. This was statistically significant different at <math>p &lt; .01</math>.</p> |
| Stevenson et al (2010) (Stevenson et al., 2010)<br><br>UK  | <p><b>Study Design:</b> cost-effectiveness analysis to assess group-CBT (gCBT) in comparison with routine primary care for women with PND in the UK.</p> <p><b>Type of intervention [exposure]:</b> Group-CBT</p> <p><b>Data collection methods:</b> SR</p> | <p><b>Sample size:</b> 401</p> <p><b>Participants:</b> Data were analysed from 401 women with an EPDS score of 12 or greater at 6 weeks after childbirth, which had completed both the EPDS and the SF-6D questionnaire at both 6 weeks and 6 months</p> <p><b>Setting:</b> Postnatal healthcare setting in the UK</p> <p><b>Dates of data collection:</b> Pre-July 2009 (when PONDER study was published).</p> | <p><b>Primary Findings:</b><br/>The mean cost per QALY from the stochastic analysis was estimated to be £36,062; however, there was considerable uncertainty around this value. The EVPI was estimated to be greater than £64 million; the key uncertainties were in the cost per woman of providing treatment and in the statistical relationship between changes in EPDS values and changes in SF-6D values. The expected value of perfect partial information for both of these parameters was more than £25 million.</p> <p><b>Additional Findings:</b><br/>The use of gCBT does not appear to be cost-effective; however, this decision is uncertain. The value of information analyses conducted indicates that further research to provide robust information on key parameters is needed and appears justified in cost-effective terms.</p> | <p>This economic evaluation found that gCBT does not appear to be cost-effective due to the lack of literature providing robust information. Only one study, an RCT, was deemed applicable to the decision problem.</p>                                                                                   |
| Wilkinson et al (2017) (Wilkinson et al., 2017)<br><br>USA | <p><b>Study Design:</b> Modelling study</p> <p><b>Type of intervention [exposure]:</b> N/A</p> <p><b>Data collection methods:</b> Hypothetical cohort</p>                                                                                                   | <p><b>Sample size:</b> 1,000</p> <p><b>Participants:</b> follows a hypothetical cohort of 1000 pregnant women experiencing one live birth over a 2-year time horizon.</p>                                                                                                                                                                                                                                       | <p><b>Primary Findings:</b></p> <ul style="list-style-type: none"> <li>Screening for and treating postpartum depression and psychosis produced 29 more healthy women at a cost of \$943 per woman.</li> <li>The incremental cost-effectiveness ratios of the intervention branch compared to usual care were \$13,857 per QALY</li> </ul>                                                                                                                                                                                                                                                                                                                                                                                                                                                                                                           | <p>This economic modelling study modelled the cost-effectiveness of physicians screening for and treating postpartum depression and psychosis in partnership with a psychiatrist.</p>                                                                                                                     |

1  
2  
3  
4  
5  
6  
7  
8  
9  
10  
11  
12  
13  
14  
15  
16  
17  
18  
19  
20  
21  
22  
23  
24  
25  
26  
27  
28  
29  
30  
31  
32  
33  
34  
35  
36  
37  
38  
39  
40  
41  
42  
43  
44  
45  
46

|  |  |                                                                                                                                                            |                                                                                                                                                                                                                                                                                                                                                                                                                                                                                                                                                                                                    |  |
|--|--|------------------------------------------------------------------------------------------------------------------------------------------------------------|----------------------------------------------------------------------------------------------------------------------------------------------------------------------------------------------------------------------------------------------------------------------------------------------------------------------------------------------------------------------------------------------------------------------------------------------------------------------------------------------------------------------------------------------------------------------------------------------------|--|
|  |  | <p><b>Setting:</b> USA healthcare setting.</p> <p><b>Dates of data collection:</b> data were obtained from literature published between 1995 and 2015.</p> | <p>gained (below the commonly accepted willingness to pay threshold of \$50,000/QALY gained) and \$10,182 per remission achieved.</p> <ul style="list-style-type: none"> <li>• These results were robust in both the deterministic and probabilistic sensitivity analyses of input parameters.</li> </ul> <p><b>Additional Findings:</b><br/>Screening for and treating postpartum depression is a cost-effective intervention and should be considered as part of usual postnatal care, which aligns with the recently proposed recommendations from the U.S. Preventive Services Task Force.</p> |  |
|--|--|------------------------------------------------------------------------------------------------------------------------------------------------------------|----------------------------------------------------------------------------------------------------------------------------------------------------------------------------------------------------------------------------------------------------------------------------------------------------------------------------------------------------------------------------------------------------------------------------------------------------------------------------------------------------------------------------------------------------------------------------------------------------|--|

For peer review only

## Data extraction table for studies including maternal health and well-being

| Citation (Country)                                            | Study Details                                                                                                                                                                                                                                                                                                                                                                                                                                                                               | Participants and setting                                                                                                                                                                                                                                                          | Key findings                                                                                                                                                                                                                                                                                                                                                                                                                                                                                                                                                                                 | Observations                                                                                                                                                                                                                                                                                                                                                                                                                                                  |
|---------------------------------------------------------------|---------------------------------------------------------------------------------------------------------------------------------------------------------------------------------------------------------------------------------------------------------------------------------------------------------------------------------------------------------------------------------------------------------------------------------------------------------------------------------------------|-----------------------------------------------------------------------------------------------------------------------------------------------------------------------------------------------------------------------------------------------------------------------------------|----------------------------------------------------------------------------------------------------------------------------------------------------------------------------------------------------------------------------------------------------------------------------------------------------------------------------------------------------------------------------------------------------------------------------------------------------------------------------------------------------------------------------------------------------------------------------------------------|---------------------------------------------------------------------------------------------------------------------------------------------------------------------------------------------------------------------------------------------------------------------------------------------------------------------------------------------------------------------------------------------------------------------------------------------------------------|
| Chojenta et al (2019)<br>(Chojenta et al., 2019)<br>Australia | <b>Study design:</b> Cross-sectional<br><br><b>Data collection methods:</b> Health economics modelling study.<br><br>Data were taken from the Australian Longitudinal Study on Women's Health (ALSWH), an ongoing population-based study of health and well-being.                                                                                                                                                                                                                          | <b>Sample size:</b> 12,689<br><br><b>Participants:</b> Three cohorts of women born 1973–78, 1946–1951 and 1921–1926, with a fourth cohort born in 1989–1995 added in 2012.<br><b>Setting:</b> Australian healthcare setting.<br><br><b>Dates of data collection:</b> 1921 to 1995 | <b>Primary findings:</b><br>The healthcare costs for postnatal women who had poor mental health prior to birth was \$1,792 (AUD). This is on average 11% more than for mothers with no previous history of poor mental health.                                                                                                                                                                                                                                                                                                                                                               | This modelling study from Australia, utilising cohort data from 1921 to 1995 found that the healthcare costs for postnatal women who had poor mental health prior to birth was \$1,792 (AUD). This is on average 11% more than for mothers with no previous history of poor mental health.                                                                                                                                                                    |
| Morrell et al (2000)<br>[34]<br>UK                            | <b>Study Design:</b> RCT<br><br><b>Type of intervention [exposure]:</b><br>Up to 10 home visits in the first postnatal month of up to three hours duration by a community postnatal support worker.<br><br>Impact of community postnatal support worker in addition to usual community midwife care on rest and recovery, health status, satisfaction with services and NHS Resource use and costs.<br><br><b>Data collection methods:</b> Postal questionnaires (including SF36 and EPDS). | <b>Sample size:</b> 623<br><br><b>Participants:</b> Postnatal women delivering at a university hospital<br><b>Setting:</b> Home and community<br><br><b>Dates of data collection:</b> Recruitment on labour wards from October 1996 to November 1997                              | <b>Primary Findings:</b> 551 completed 6 weeks questionnaire, 493 at 6 months. No evidence of use of fewer NHS services by women using the support worker versus controls at 6 weeks or 6 months. Additional costs per woman at 6 weeks of £179.58 mostly due to support worker training ( $p < 0.001$ ).<br><br><b>Additional Findings:</b> No diff primary outcome at 6 weeks but $p < 0.05$ for physical and social functioning and $p = 0.05$ EPDS for controls. No difference in SF36 health status scores, EPDS scale or Duke Functional Social Support scale, rate of breastfeeding). | This study found that there were no savings to the NHS over six months after the introduction of a community support worker service and no improvement to the health status among the women in the intervention group, which was measured by an SF-36 questionnaire. At six weeks, the mean total NHS costs were £975 <sup>01</sup> for the intervention group and £700 for the control group. At six months, the figures were £1,250 and £980, respectively. |
| Ride (2018)                                                   | <b>Study Design:</b> Modelling study (health economics)                                                                                                                                                                                                                                                                                                                                                                                                                                     | <b>Date of model:</b> 2018<br><br>The models were developed using TreeAge Pro 2015 software (TreeAge Software, Inc.,                                                                                                                                                              | <b>Primary Findings:</b> The results suggest that broader boundaries, particularly extension of the time horizon, could make substantial differences to                                                                                                                                                                                                                                                                                                                                                                                                                                      | By ignoring broader sets of costs and outcomes, resources in postnatal mental health may be misallocated, and as a result, some women may not benefit as                                                                                                                                                                                                                                                                                                      |



1  
2  
3  
4  
5  
6  
7  
8  
9  
10  
11  
12  
13  
14  
15  
16  
17  
18  
19  
20  
21  
22  
23  
24  
25  
26  
27  
28  
29  
30  
31  
32  
33  
34  
35  
36  
37  
38  
39  
40  
41  
42  
43  
44  
45  
46

|                               |                                                             |                                                                                                                                                                                                                                                                                                                                                                                                                                                                                                                                                                                                                 |                                                                                                                                                                                                                                                                                                                                                                                                                                                                  |                                                                                    |
|-------------------------------|-------------------------------------------------------------|-----------------------------------------------------------------------------------------------------------------------------------------------------------------------------------------------------------------------------------------------------------------------------------------------------------------------------------------------------------------------------------------------------------------------------------------------------------------------------------------------------------------------------------------------------------------------------------------------------------------|------------------------------------------------------------------------------------------------------------------------------------------------------------------------------------------------------------------------------------------------------------------------------------------------------------------------------------------------------------------------------------------------------------------------------------------------------------------|------------------------------------------------------------------------------------|
| (Ride, 2018)<br><br><b>UK</b> | <b>Data collection methods:</b> Decision analytic modelling | Williamstown, MA, USA). The population of interest was postnatal women and their children in the United Kingdom, because much of the data came from that setting; this gave an explicit societal threshold of £20,000 to £30,000 per QALY for cost-effectiveness analysis in health care. A health sector perspective was taken, except for the children's model, which expanded to a public sector perspective to accommodate educational costs. A discount rate of 3.5% was applied to costs and QALYs, with discounting applied back to the child's birth. All costs were converted to 2014 pounds sterling. | estimated cost-effectiveness. Inclusion of family effects without extension of the time horizon had little impact, but where a longer time horizon was used, family effects could make a significant difference to the conclusions drawn from cost-effectiveness analysis<br><br><b>Additional Findings:</b><br>The authors note that it is important not only to consider caregiving but also family health effects in the outcomes of maternal health studies. | much from interventions that might be cost-effective given a broader time-horizon. |
|-------------------------------|-------------------------------------------------------------|-----------------------------------------------------------------------------------------------------------------------------------------------------------------------------------------------------------------------------------------------------------------------------------------------------------------------------------------------------------------------------------------------------------------------------------------------------------------------------------------------------------------------------------------------------------------------------------------------------------------|------------------------------------------------------------------------------------------------------------------------------------------------------------------------------------------------------------------------------------------------------------------------------------------------------------------------------------------------------------------------------------------------------------------------------------------------------------------|------------------------------------------------------------------------------------|



## PRISMA 2020 checklist

| Section and Topic             | Item # | Checklist item                                                                                                                                                                                                                                                                                       | Location where item is reported |
|-------------------------------|--------|------------------------------------------------------------------------------------------------------------------------------------------------------------------------------------------------------------------------------------------------------------------------------------------------------|---------------------------------|
| <b>TITLE</b>                  |        |                                                                                                                                                                                                                                                                                                      |                                 |
| Title                         | 1      | Identify the report as a systematic review.                                                                                                                                                                                                                                                          | Page 2                          |
| <b>ABSTRACT</b>               |        |                                                                                                                                                                                                                                                                                                      |                                 |
| Abstract                      | 2      | See the PRISMA 2020 for Abstracts checklist.                                                                                                                                                                                                                                                         | Figure 1                        |
| <b>INTRODUCTION</b>           |        |                                                                                                                                                                                                                                                                                                      |                                 |
| Rationale                     | 3      | Describe the rationale for the review in the context of existing knowledge.                                                                                                                                                                                                                          | Page 4                          |
| Objectives                    | 4      | Provide an explicit statement of the objective(s) or question(s) the review addresses.                                                                                                                                                                                                               | Page 4                          |
| <b>METHODS</b>                |        |                                                                                                                                                                                                                                                                                                      |                                 |
| Eligibility criteria          | 5      | Specify the inclusion and exclusion criteria for the review and how studies were grouped for the syntheses.                                                                                                                                                                                          | Page 5                          |
| Information sources           | 6      | Specify all databases, registers, websites, organisations, reference lists and other sources searched or consulted to identify studies. Specify the date when each source was last searched or consulted.                                                                                            | Page 5                          |
| Search strategy               | 7      | Present the full search strategies for all databases, registers and websites, including any filters and limits used.                                                                                                                                                                                 | Supplementary Material          |
| Selection process             | 8      | Specify the methods used to decide whether a study met the inclusion criteria of the review, including how many reviewers screened each record and each report retrieved, whether they worked independently, and if applicable, details of automation tools used in the process.                     | Page 6                          |
| Data collection process       | 9      | Specify the methods used to collect data from reports, including how many reviewers collected data from each report, whether they worked independently, any processes for obtaining or confirming data from study investigators, and if applicable, details of automation tools used in the process. | Page 6                          |
| Data items                    | 10a    | List and define all outcomes for which data were sought. Specify whether all results that were compatible with each outcome domain in each study were sought (e.g. for all measures, time points, analyses), and if not, the methods used to decide which results to collect.                        | Page 6                          |
|                               | 10b    | List and define all other variables for which data were sought (e.g. participant and intervention characteristics, funding sources). Describe any assumptions made about any missing or unclear information.                                                                                         | Page 6                          |
| Study risk of bias assessment | 11     | Specify the methods used to assess risk of bias in the included studies, including details of the tool(s) used, how many reviewers assessed each study and whether they worked independently, and if applicable, details of automation tools used in the process.                                    | Supplementary Material          |
| Effect measures               | 12     | Specify for each outcome the effect measure(s) (e.g. risk ratio, mean difference) used in the synthesis or presentation of results.                                                                                                                                                                  | Page 8                          |
| Synthesis methods             | 13a    | Describe the processes used to decide which studies were eligible for each synthesis (e.g. tabulating the study intervention characteristics and comparing against the planned groups for each synthesis (item #5)).                                                                                 | Page 6                          |
|                               | 13b    | Describe any methods required to prepare the data for presentation or synthesis, such as handling of missing summary statistics, or data conversions.                                                                                                                                                | Page 6                          |
|                               | 13c    | Describe any methods used to tabulate or visually display results of individual studies and syntheses.                                                                                                                                                                                               | From Page 9                     |
|                               | 13d    | Describe any methods used to synthesize results and provide a rationale for the choice(s). If meta-analysis was performed, describe the model(s), method(s) to identify the presence and extent of statistical heterogeneity, and software package(s) used.                                          | Page 8                          |
|                               | 13e    | Describe any methods used to explore possible causes of heterogeneity among study results (e.g. subgroup analysis, meta-regression).                                                                                                                                                                 | N/A                             |
|                               | 13f    | Describe any sensitivity analyses conducted to assess robustness of the synthesized results.                                                                                                                                                                                                         | N/A                             |
| Reporting bias assessment     | 14     | Describe any methods used to assess risk of bias due to missing results in a synthesis (arising from reporting biases).                                                                                                                                                                              | Supplementary Material          |
| Certainty                     | 15     | Describe any methods used to assess certainty (or confidence) in the body of evidence for an outcome.                                                                                                                                                                                                |                                 |



## PRISMA 2020 checklist

| Section and Topic                              | Item # | Checklist item                                                                                                                                                                                                                                                                       | Location where item is reported |
|------------------------------------------------|--------|--------------------------------------------------------------------------------------------------------------------------------------------------------------------------------------------------------------------------------------------------------------------------------------|---------------------------------|
| assessment                                     |        |                                                                                                                                                                                                                                                                                      |                                 |
| <b>RESULTS</b>                                 |        |                                                                                                                                                                                                                                                                                      |                                 |
| Study selection                                | 16a    | Describe the results of the search and selection process, from the number of records identified in the search to the number of studies included in the review, ideally using a flow diagram.                                                                                         | Page 8                          |
|                                                | 16b    | Cite studies that might appear to meet the inclusion criteria, but which were excluded, and explain why they were excluded.                                                                                                                                                          | Page 8                          |
| Study characteristics                          | 17     | Cite each included study and present its characteristics.                                                                                                                                                                                                                            | Page 8                          |
| Risk of bias in studies                        | 18     | Present assessments of risk of bias for each included study.                                                                                                                                                                                                                         | Page 8                          |
| Results of individual studies                  | 19     | For all outcomes, present, for each study: (a) summary statistics for each group (where appropriate) and (b) an effect estimate and its precision (e.g. confidence/credible interval), ideally using structured tables or plots.                                                     | Page 8                          |
| Results of syntheses                           | 20a    | For each synthesis, briefly summarise the characteristics and risk of bias among contributing studies.                                                                                                                                                                               | Page 8                          |
|                                                | 20b    | Present results of all statistical syntheses conducted. If meta-analysis was done, present for each the summary estimate and its precision (e.g. confidence/credible interval) and measures of statistical heterogeneity. If comparing groups, describe the direction of the effect. | Page 8                          |
|                                                | 20c    | Present results of all investigations of possible causes of heterogeneity among study results.                                                                                                                                                                                       | Page 8                          |
|                                                | 20d    | Present results of all sensitivity analyses conducted to assess the robustness of the synthesized results.                                                                                                                                                                           | N/A                             |
| Reporting biases                               | 21     | Present assessments of risk of bias due to missing results (arising from reporting biases) for each synthesis assessed.                                                                                                                                                              | Supplementary Material          |
| Certainty of evidence                          | 22     | Present assessments of certainty (or confidence) in the body of evidence for each outcome assessed.                                                                                                                                                                                  | Supplementary Material          |
| <b>DISCUSSION</b>                              |        |                                                                                                                                                                                                                                                                                      |                                 |
| Discussion                                     | 23a    | Provide a general interpretation of the results in the context of other evidence.                                                                                                                                                                                                    | Page 25                         |
|                                                | 23b    | Discuss any limitations of the evidence included in the review.                                                                                                                                                                                                                      | Page 2                          |
|                                                | 23c    | Discuss any limitations of the review processes used.                                                                                                                                                                                                                                | N/A                             |
|                                                | 23d    | Discuss implications of the results for practice, policy, and future research.                                                                                                                                                                                                       | Page 26                         |
| <b>OTHER INFORMATION</b>                       |        |                                                                                                                                                                                                                                                                                      |                                 |
| Registration and protocol                      | 24a    | Provide registration information for the review, including register name and registration number, or state that the review was not registered.                                                                                                                                       | Page 5                          |
|                                                | 24b    | Indicate where the review protocol can be accessed, or state that a protocol was not prepared.                                                                                                                                                                                       | Page 5                          |
|                                                | 24c    | Describe and explain any amendments to information provided at registration or in the protocol.                                                                                                                                                                                      | N/A                             |
| Support                                        | 25     | Describe sources of financial or non-financial support for the review, and the role of the funders or sponsors in the review.                                                                                                                                                        | Page 27                         |
| Competing interests                            | 26     | Declare any competing interests of review authors.                                                                                                                                                                                                                                   | Page 27                         |
| Availability of data, code and other materials | 27     | Report which of the following are publicly available and where they can be found: template data collection forms; data extracted from included studies; data used for all analyses; analytic code; any other materials used in the review.                                           | Page 9 onwards                  |

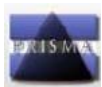

## PRISMA 2020 checklist

1  
2  
3  
4  
5  
6  
7  
8  
9  
10  
11  
12  
13  
14  
15  
16  
17  
18  
19  
20  
21  
22  
23  
24  
25  
26  
27  
28  
29  
30  
31  
32  
33  
34  
35  
36  
37  
38  
39  
40  
41  
42  
43  
44  
45  
46  
47

From: Page MJ, McKenzie JE, Bossuyt PM, Boutron I, Hoffmann TC, Mulrow CD, et al. The PRISMA 2020 statement: an updated guideline for reporting systematic reviews. *BMJ* 2021;372:n71. doi: 10.1136/bmj.n71  
For more information, visit: <http://www.prisma-statement.org/>

For peer review only
