# Supplementary material for: Health economic evaluations of preventative care for perinatal anxiety and associated disorders: a rapid review
Source: PubMed Central journal article supplement (PMC10900391; doi:10.1136/bmjopen-2022-068941), 2024-02-27
Supplement: bmjopen-2022-068941supp001.pdf [file bmjopen-2022-068941supp001.pdf]

## Search strategy

Below is an example of a search strategy for the Medline database.

| ID | Search terms                                                                                                                                              |
|----|-----------------------------------------------------------------------------------------------------------------------------------------------------------|
| 1  | exp Pregnancy/                                                                                                                                            |
| 2  | (pregnan* or childbearing).ti,ab,kw.                                                                                                                      |
| 3  | (postpartum or post-partum or postnatal or postnatal or perinatal or peri-natal or prenatal or pre-natal or antenatal or ante-natal or matern*).ti,ab,kw. |
| 4  | perinatal anxiety.ti,ab,kw. or exp Perinatal anxiety/                                                                                                     |
| 5  | exp Depression/                                                                                                                                           |
| 6  | depress\$.ti,ab,kw.                                                                                                                                       |
| 7  | 5 or 6                                                                                                                                                    |
| 8  | (Infant or baby or child).ti,ab,kw                                                                                                                        |
| 9  | (care* or treatment).ti,ab,kw                                                                                                                             |
| 10 | NHS.ti,ab,kw                                                                                                                                              |
| 11 | hospitali\$ation*.ti,ab,kw                                                                                                                                |
| 12 | exp Resource allocation/                                                                                                                                  |
| 13 | economic evaluation\$.ti,ab,kw.                                                                                                                           |
| 14 | (cost* or economic* or pharmacoeconomic*).ti.                                                                                                             |
| 15 | 13 or 14                                                                                                                                                  |
| 16 | exp "costs and cost analysis"/ or exp Health Care Costs/                                                                                                  |
| 17 | exp Cost-Benefit Analysis/                                                                                                                                |
| 18 | (cost* adj2 (effective* or utility* or benefit* or consequence* or minimi*).ti,ab,kw.                                                                     |
| 19 | 16 or 17 or 18                                                                                                                                            |
| 20 | quality-adjusted life year\$.ti,ab,kw. or exp Quality-Adjusted Life Years/                                                                                |
| 21 | Or 7 and 15 and 19                                                                                                                                        |

## Quality appraisal of health economic evaluation studies [24]

| Drummond et al checklist 2015                                                                    | Petrou et al (2002) [40] | Petrou et al (2006) [4] | Ride et al (2016) [32] | Henderson et al (2019) [38] |
|--------------------------------------------------------------------------------------------------|--------------------------|-------------------------|------------------------|-----------------------------|
| 1. Was a well defined question posed in an answerable form?                                      | Yes                      | Yes                     | Yes                    | Yes                         |
| 2. Was a comprehensive description of the competing alternatives given?                          | n/a                      | n/a                     | Yes                    | Yes                         |
| 3. Was the effectiveness of the programs or services established?                                | n/a                      | n/a                     | Yes                    | Yes                         |
| 4. Were all the important and relevant costs and consequences for each alternative identified?   | n/a                      | n/a                     | Yes                    | Yes                         |
| 5. Were costs and consequences measured accurately in appropriate physical units?                | Yes                      | Yes                     | Yes                    | Yes                         |
| 6. Were costs and consequences valued credibly?                                                  | Yes                      | Yes                     | Yes                    | Yes                         |
| 7. Were costs and consequences adjusted for differential timing?                                 | n/a                      | n/a                     | No                     | No                          |
| 8. Was an incremental analysis of costs and consequences of alternatives performed?              | n/a                      | n/a                     | No                     | Yes                         |
| 9. Was allowance made for uncertainty in the estimates of costs and consequences?                | Yes                      | Yes                     | Yes                    | Yes                         |
| 10. Did the presentation and discussion of study results include all issues of concern to users? | Yes                      | Yes                     | Yes                    | Yes                         |

Source of checklist: Drummond, M. F., Sculpher, M. J., Claxton, K., Stoddart, G. L., & Torrance G W. (2015). *Methods for the economic evaluation of health care programmes* (4th ed.). Oxford: Oxford University Press.

## Quality appraisal of health economic modelling studies with CHARMS Checklist [25]

| Domain                     | Key items                                                                                 | Counts et al (2022) - [34] | Franta et al (2022) - (Franta et al., 2022) | Ride (2018) - [45] | Wilkins on et al (2017) - [5] | Bauer et al (2015) (Bauer et al, 2015) | Stevenso n et al, (2010) [42] |
|----------------------------|-------------------------------------------------------------------------------------------|----------------------------|---------------------------------------------|--------------------|-------------------------------|----------------------------------------|-------------------------------|
| SOURCE OF DATA             | Source of data (e.g., cohort, case-control, randomized trial participants)                | p.3                        | p.2                                         | p.575              | p.3                           | p.52                                   | p.581                         |
| PARTICIPANTS               | Participant eligibility and recruitment method (e.g., consecutive participants, location, | p.3                        | p.2                                         | p.575              | p.3                           | p.52                                   | p.581                         |
|                            | Participant description                                                                   | p.3                        | p.2                                         | p.575              | p.3                           | p.52                                   | p.581                         |
|                            | Details of treatments received, if                                                        | p.5                        | p.2                                         | p.575              | p.3                           | p.52                                   | N/A                           |
|                            | Study dates                                                                               | p.4                        | p.2                                         | p.575              | p.3                           | p.52                                   | p.581                         |
| OUTCOME(S) TO BE PREDICTED | Definition and method for measurement of outcome                                          | p.4                        | p.2                                         | p.574              | p.4                           | p.53                                   | p.581-582                     |
|                            | Was the same outcome definition (and method for measurement ) used in all                 | Yes p.5                    | p.2                                         | p.574              | p.4                           | p.53                                   | p.581-582                     |
|                            | Type of outcome (e.g., single or combined                                                 | p.3                        | p.5                                         | p.574              | p.4                           | p.53                                   | p.581                         |
|                            | Was the outcome assessed without knowledge of                                             | No                         | No                                          | No                 | No                            | No                                     | p.581                         |
|                            | Were candidate predictors part of the outcome                                             | No                         | No                                          | No                 | No                            | No                                     | p.581                         |

|                                              |                                                                                                    |         |         |         |         |         |           |
|----------------------------------------------|----------------------------------------------------------------------------------------------------|---------|---------|---------|---------|---------|-----------|
|                                              | Time of outcome occurrence or summary of duration of follow-up                                     | p.5     | p.5     | p.578   | p.4     | p.52    | p.581     |
| <b>CANDIDATE PREDICTORS (OR INDEX TESTS)</b> | Number and type of predictors (e.g., demographics, patient history, physical examination,          | p.5     | p.5     | p.577   | p.6     | p.55    | p.582     |
|                                              | Definition and method for measurement of candidate predictors                                      | p.5     | p.5     | p.575   | p.6     | p.55    | p.580-582 |
|                                              | Timing of predictor measurement (e.g., at patient presentation, at diagnosis,                      | p.5     | p.5     | p.577   | p.6     | p.55    | p.581     |
|                                              | Were predictors assessed blinded for outcome, and for each other                                   | No      | No      | No      | No      | No      | p.582     |
|                                              | Handling of predictors in the modelling (e.g., continuous, linear, non-linear transformatio        | Unclear | Unclear | Unclear | Unclear | p.52    | p.582     |
|                                              |                                                                                                    |         |         |         |         |         |           |
| <b>SAMPLE SIZE</b>                           | Number of participants and number of outcomes/ev                                                   | p.3     | p.2     | p.575   | P.3     | p.55    | p.582     |
|                                              | Number of outcomes/ev ents in relation to the number of candidate predictors (Events Per Variable) | p.5     | p.3     | p.577   | p.20    | p.57    | p.582     |
| <b>MISSING DATA</b>                          | Number of participants with any missing value                                                      | p.4     | Unclear | Unclear | Unclear | Unclear | Unclear   |

|                          |                                                                                                                                                                                                     |                                  |                        |                         |                        |                         |                    |
|--------------------------|-----------------------------------------------------------------------------------------------------------------------------------------------------------------------------------------------------|----------------------------------|------------------------|-------------------------|------------------------|-------------------------|--------------------|
|                          | Number of participants with missing data for each predictor                                                                                                                                         | Unclear                          | Unclear                | Unclear                 | Unclear                | Unclear                 | Unclear            |
|                          | Handling of missing data (e.g., complete-case analysis, imputation, or                                                                                                                              | Unclear                          | Unclear                | Unclear                 | Unclear                | Unclear                 | Unclear            |
| <b>MODEL DEVELOPMENT</b> | Modelling method (e.g., logistic, survival, neural network, or                                                                                                                                      | Simulated cohort model           | Simulated cohort model | Decision analytic model | Simulated cohort model | Decision analytic model | Mathematical model |
|                          | Modelling assumptions satisfied                                                                                                                                                                     | See Appendix 1 in the supplement | p.5                    | p.577                   | p.4                    | p.53                    | p.580              |
|                          | Method for selection of predictors <b>for inclusion</b> in multivariable modelling (e.g., all candidate predictors, pre-selection based on unadjusted association with the                          | Unclear                          | Unclear                | p.577                   | p.4                    | p.53                    | p.581              |
|                          | Method for selection of predictors <b>during multivariable modelling</b> (e.g., full model approach, backward or forward selection) and criteria used (e.g., p-value, Akaike Information Criterion) | Unclear                          | Unclear                | Unclear                 | Unclear                | p.53                    | Unclear            |

|                          |                                                                                                                                                                                                                      |                  |         |         |         |         |         |
|--------------------------|----------------------------------------------------------------------------------------------------------------------------------------------------------------------------------------------------------------------|------------------|---------|---------|---------|---------|---------|
|                          | Shrinkage of predictor weights or regression coefficients (e.g., no shrinkage,                                                                                                                                       | Unclear          | Unclear | Unclear | Unclear | Unclear | Unclear |
| <b>MODEL PERFORMANCE</b> | Calibration (calibration plot, calibration slope, Hosmer-Lemeshow test) and Discrimination (C-statistic, D-statistic, log-rank)                                                                                      | p.5              | Unclear | Unclear | Unclear | Unclear | Unclear |
|                          | Classification measures (e.g., sensitivity, specificity, predictive values, net reclassification improvement) and whether a-priori cut                                                                               | See e-appendix 3 | p.6     | p.577   | p.6     | No      | p.581   |
| <b>MODEL EVALUATION</b>  | Method used for testing model performance: development dataset only (random split of data, resampling methods e.g. bootstrap or cross-validation, none) or separate external validation (e.g. temporal, geographical | See e-appendix 3 | Unclear | Unclear | p.6     | No      | Unclear |

|                |                                                                                                                                                                                                            |         |         |         |         |    |         |
|----------------|------------------------------------------------------------------------------------------------------------------------------------------------------------------------------------------------------------|---------|---------|---------|---------|----|---------|
|                | In case of poor validation, whether model was adjusted or updated (e.g., intercept recalibrated, predictor effects)                                                                                        | Unclear | Unclear | Unclear | Unclear | No | Unclear |
| <b>RESULTS</b> | Final and other multivariable models (e.g., basic, extended, simplified) presented, including predictor weights or regression coefficients, intercept, baseline survival, model performance measures (with | Unclear | Unclear | Unclear | Unclear | No | No      |
|                | Any alternative presentation of the final prediction models, e.g., sum score, nomogram, score chart, predictions for specific risk subgroups                                                               | No      | No      | p.578   | p.23    | No | No      |
|                | Comparison of the distribution of predictors (including missing data) for development and validation                                                                                                       | No      | No      | No      | No      | No | No      |

|                                      |                                                                                                                            |     |     |       |     |      |       |
|--------------------------------------|----------------------------------------------------------------------------------------------------------------------------|-----|-----|-------|-----|------|-------|
| <b>INTERPRETATION AND DISCUSSION</b> | Interpretation of presented models (confirmatory, i.e., model useful for practice versus exploratory, i.e., more research) | p.7 | p.5 | p.577 | p.6 | p.56 | p.583 |
|                                      | Comparison with other studies, discussion of generalizability, strengths and limitations.                                  | p.7 | p.5 | p.577 | p.6 | p.58 | p.583 |

**JBI critical appraisal checklist for Systematic Reviews and Research Syntheses [26]**

| Citation                  | Q1. Is the review question clearly stated and explicitly stated? | Q2. Were the inclusion criteria appropriate for the review question? | Q3. Was the search strategy appropriate? | Q4. Were the sources and resources used to search for studies adequate? | Q5. Were the criteria for appraising studies appropriate? | Q6. Was critical appraisal conducted by two or more reviewers independently? | Q7. Were there methods to minimize errors in data extraction? | Q8. Were the methods used to combine studies appropriate? | Q9. Was the likelihood of publication bias assessed? | Q10. Were recommendations for policy and/or practice supported by the reported data? | Q11. Were the specific directives for new research appropriate? |
|---------------------------|------------------------------------------------------------------|----------------------------------------------------------------------|------------------------------------------|-------------------------------------------------------------------------|-----------------------------------------------------------|------------------------------------------------------------------------------|---------------------------------------------------------------|-----------------------------------------------------------|------------------------------------------------------|--------------------------------------------------------------------------------------|-----------------------------------------------------------------|
| (Camacho & Shields, 2018) | Yes                                                              | Yes                                                                  | Yes                                      | Yes                                                                     | Yes                                                       | Unclear                                                                      | Yes                                                           | Yes                                                       | Yes                                                  | Yes                                                                                  | Yes                                                             |
| [37]                      | Yes                                                              | Yes                                                                  | Yes                                      | Yes                                                                     | Yes                                                       | Unclear                                                                      | Yes                                                           | Unclear                                                   | Yes                                                  | Yes                                                                                  | Yes                                                             |
| (Moran et al., 2020)      | Yes                                                              | Yes                                                                  | Yes                                      | Yes                                                                     | Yes                                                       | Yes                                                                          | Yes                                                           | Yes                                                       | Yes                                                  | Unclear                                                                              | Yes                                                             |
| (Morrell et al., 2016)    | Yes                                                              | Yes                                                                  | Yes                                      | Yes                                                                     | Yes                                                       | Yes                                                                          | Yes                                                           | Yes                                                       | Yes                                                  | Yes                                                                                  | Yes                                                             |

**JBI Critical appraisal checklist for randomized controlled trials [27]**

| Citation | Q1. Was true randomization used for assignment of participants to treatment groups? | Q2. Was allocation to treatment groups concealed? | Q3. Were treatment groups similar at baseline? | Q4. Were participants blind to treatment assignment? | Q5. Were those delivering treatment blind to treatment? | Q6. Were outcomes assessed blind to treatment? | Q7. Were treatment groups treated identically other than the intervention? | Q8. Was follow up complete and if not, were differences were? | Q9. Were participants analyzed in the groups to which they were? | Q10. Were outcomes measured in the same way for? | Q11. Were outcomes measured in a reliable way? | Q12. Was appropriate statistical analysis used? | Q13. Was the trial design appropriate, and any deviations from the standard? |
|----------|-------------------------------------------------------------------------------------|---------------------------------------------------|------------------------------------------------|------------------------------------------------------|---------------------------------------------------------|------------------------------------------------|----------------------------------------------------------------------------|---------------------------------------------------------------|------------------------------------------------------------------|--------------------------------------------------|------------------------------------------------|-------------------------------------------------|------------------------------------------------------------------------------|
|----------|-------------------------------------------------------------------------------------|---------------------------------------------------|------------------------------------------------|------------------------------------------------------|---------------------------------------------------------|------------------------------------------------|----------------------------------------------------------------------------|---------------------------------------------------------------|------------------------------------------------------------------|--------------------------------------------------|------------------------------------------------|-------------------------------------------------|------------------------------------------------------------------------------|



|      |     |     |     |         |             |             |                           |                                                                               |             |                   |         |     |                                                                                                                |
|------|-----|-----|-----|---------|-------------|-------------|---------------------------|-------------------------------------------------------------------------------|-------------|-------------------|---------|-----|----------------------------------------------------------------------------------------------------------------|
|      |     |     |     |         | assignment? | assignment? | intervention of interest? | between groups in terms of their follow up adequately described and analyzed? | randomized? | treatment groups? |         |     | RCT design (individual randomization, parallel groups) accounted for in the conduct and analysis of the trial? |
| [29] | Yes | Yes | Yes | Unclear | Yes         | Unclear     | Yes                       | Yes                                                                           | No          | Yes               | Unclear | Yes | N/A                                                                                                            |
| [44] | Yes | Yes | Yes | Yes     | Yes         | Unclear     | Yes                       | Yes                                                                           | Yes         | Yes               | Yes     | Yes | Yes                                                                                                            |

**JBI Critical Appraisal Checklist for Cohort Studies [28]**

| Citation                   | Q1. Were the two groups similar and recruited from the same population? | Q2. Were the exposures measured similarly to assign people to both exposed and unexposed groups? | Q3. Was the exposure measured in a valid and reliable way? | Q4. Were confounding factors identified? | Q5. Were strategies to deal with confounding factors stated? | Q6. Were the groups/participants free of the outcome at the start of the study (or at the moment of exposure)? | Q7. Were the outcomes measured in a valid and reliable way? | Q8. Was the follow up time reported and sufficient to be long enough for outcomes to occur? | Q9. Was follow up complete, and if not, were the reasons to loss to follow up described and explored? | Q10. Were strategies to address incomplete follow up utilized? | Q11. Was appropriate statistical analysis used? |
|----------------------------|-------------------------------------------------------------------------|--------------------------------------------------------------------------------------------------|------------------------------------------------------------|------------------------------------------|--------------------------------------------------------------|----------------------------------------------------------------------------------------------------------------|-------------------------------------------------------------|---------------------------------------------------------------------------------------------|-------------------------------------------------------------------------------------------------------|----------------------------------------------------------------|-------------------------------------------------|
| (Moore Simas et al., 2020) | Yes                                                                     | Yes                                                                                              | Yes                                                        | No                                       | No                                                           | Yes                                                                                                            | Yes                                                         | Yes                                                                                         | Unclear                                                                                               | N/A                                                            | Yes                                             |

**JBI Critical Appraisal Checklist for Cross-sectional studies [28]**

| Citation              | Q1. Were the criteria for inclusion in the sample clearly defined? | Q2. Were the study subjects and the setting described in detail? | Q3. Was the exposure measured in a valid and reliable way? | Q4. Were objective, standard criteria used for measurement of the condition? | Q5. Were confounding factors identified? | Q6. Were strategies to deal with confounding factors stated? | Q7. Were the outcomes measured in a valid and reliable way? | Q8. Was appropriate statistical analysis used? |
|-----------------------|--------------------------------------------------------------------|------------------------------------------------------------------|------------------------------------------------------------|------------------------------------------------------------------------------|------------------------------------------|--------------------------------------------------------------|-------------------------------------------------------------|------------------------------------------------|
| Dagher et al., 2012   | Yes                                                                | Yes                                                              | Yes                                                        | Yes                                                                          | No                                       | No                                                           | Yes                                                         | Yes                                            |
| Chojenta et al., 2019 | Yes                                                                | Yes                                                              | Yes                                                        | Yes                                                                          | Yes                                      | Yes                                                          | Yes                                                         | Unclear                                        |
| Ammerman et al., 2016 | Yes                                                                | Yes                                                              | Yes                                                        | Yes                                                                          | Yes                                      | Yes                                                          | Yes                                                         | Yes                                            |
| Roberts et al., 2001  | Yes                                                                | Yes                                                              | Yes                                                        | Yes                                                                          | No                                       | N/A                                                          | Yes                                                         | Yes                                            |

## Abbreviations

| Abbreviation        | Full                                                                 | Aspect            |
|---------------------|----------------------------------------------------------------------|-------------------|
| ANOVA               | Analysis of Variance                                                 | Analysis          |
| ANRQ-R              | Antenatal Risk Questionnaire                                         | Tool              |
| CATi                | Computer Assisted Telephone Interviews                               | Research          |
| CBA                 | Cognitive Behavioural Approach                                       | Intervention      |
| CBT                 | Cognitive Behavioural Therapy                                        | Intervention      |
| CEA                 | Cost Effectiveness Analysis                                          | Analysis          |
| CIDI                | Composite International Diagnostic Interview                         | Research          |
| CUA                 | Cost Utility Analysis                                                | Analysis          |
| DASS21              | Depression, Anxiety and Stress Scale                                 | Tool              |
| DCS                 | Depression Care Specialist                                           | Staff             |
| DFD                 | Disease Free Day                                                     | Research          |
| DSM-IV              | Diagnostic and Statistical Manual for Mental Disorders 4th Edition   | Source            |
| eMBI                | electronic Mindfulness-based Intervention                            | Intervention      |
| EPDS                | Edinburgh Postnatal Depression Scale                                 | Tool              |
| ePRO                | electronic Patient Reported Outcomes                                 | Research          |
| EQ-5D-3L            | EuroQol 5 Dimension 3 Level                                          | Tool              |
| GP                  | General Practitioner                                                 | Staff             |
| gCBT                | Group cognitive behavioural therapy                                  | Intervention      |
| HRU                 | Healthcare resource utilization                                      | Analysis          |
| HV                  | Health Visitor                                                       | Staff             |
| ICD                 | International Classification of Diseases                             | Source            |
| ICER                | Incremental Cost-Effectiveness Ratio                                 | Analysis          |
| IG                  | Intervention Group                                                   | Research          |
| IPT                 | Interpersonal psychotherapy                                          | Intervention      |
| ITT                 | Intention to Treat                                                   | Research          |
| LGA                 | Local Government Area                                                | Organisation      |
| MBS                 | Medical Benefits Schedule                                            | Source            |
| MCH                 | Maternal and Child Health                                            | Setting           |
| MFAS                | Maternal-Fetal Attachment Scale                                      | Tool              |
| MOMcare             |                                                                      | <i>Study name</i> |
| MINI                | Mini-International Neuropsychiatric Interview                        | Tool              |
| NHS                 | National Health Service                                              | Setting           |
| OOP                 | Out of Pocket                                                        | Research          |
| PAD                 | perinatal anxiety and/or depression                                  | Diagnosis         |
| PBS                 | Pharmaceutical Benefits Scheme                                       | Source            |
| PCA                 | Personalised Care Approach                                           | Intervention      |
| PHQ-9               | Patient Health Questionnaire                                         | Tool              |
| PND                 | Postnatal depression                                                 | Diagnosis         |
| PND                 | Post-partum depression                                               | Diagnosis         |
| <i>PoNDER trial</i> | <b>POstNatal Depression Economic evaluation and Randomised trial</b> | <i>Study name</i> |
| PRAQ-R              | Pregnancy-Related Anxiety Questionnaire                              | Tool              |
| PTSD                | Post-Traumatic Stress Disorder                                       | Diagnosis         |
| QALY                | Quality Adjusted Life Year                                           | Analysis          |

|        |                                                                  |                   |
|--------|------------------------------------------------------------------|-------------------|
| RCT    | Randomised controlled trial                                      | Research          |
| SCL-20 | Hopkins Symptom Checklist-20                                     | Tool              |
| SF36   | Short-Form 36                                                    | Tool              |
| SIDS   | Sudden infant death syndrome                                     | Diagnosis         |
| SPARCS | <i>Sleep, Parenting and Relationships in a Community Setting</i> | <i>Study name</i> |
| STAI   | State-Trait Anxiety Questionnaire                                | Tool              |
| TAU    | Treatment as Usual                                               | Research          |
| TENS   | Transcutaneous Electrical Nerve Stimulation                      | Intervention      |
| WHO    | World Health Organisation                                        | Organisation      |
| WWWT   | What Were We Thinking                                            | Tool              |
